# Supplementary material for: Chronic Ca2+ imaging of cortical neurons with long-term expression of GCaMP-X
Source: eLife journal article supplement (doi:10.7554/elife.76691), 2022-10-05

**A**

Rasgrf2-2A-dCre x Ai148

DIV 7

DIV 28

GFP

Ai148

GFP

Ai148

100  $\mu\text{m}$ 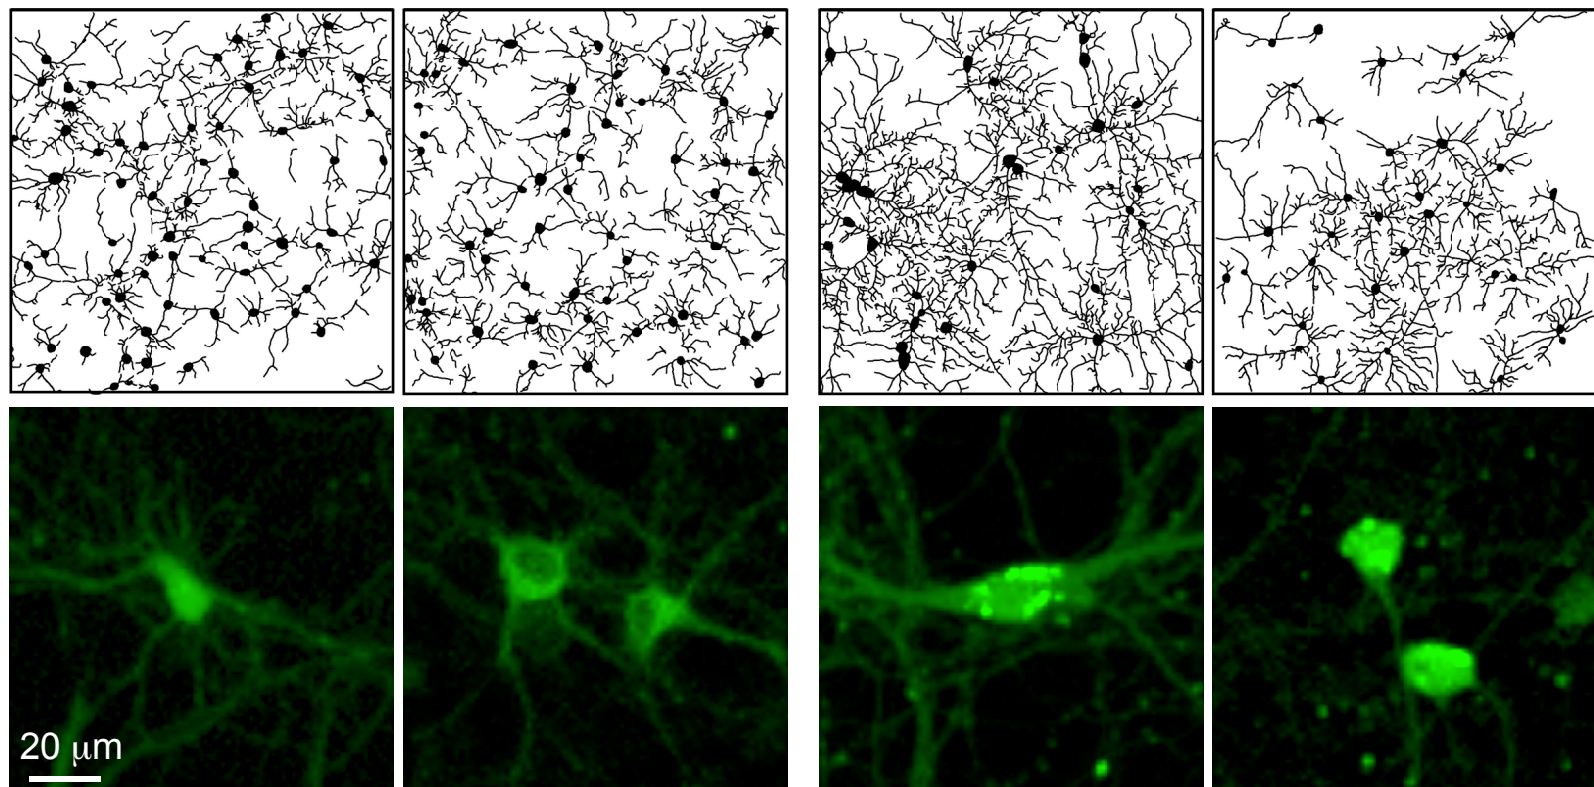**B**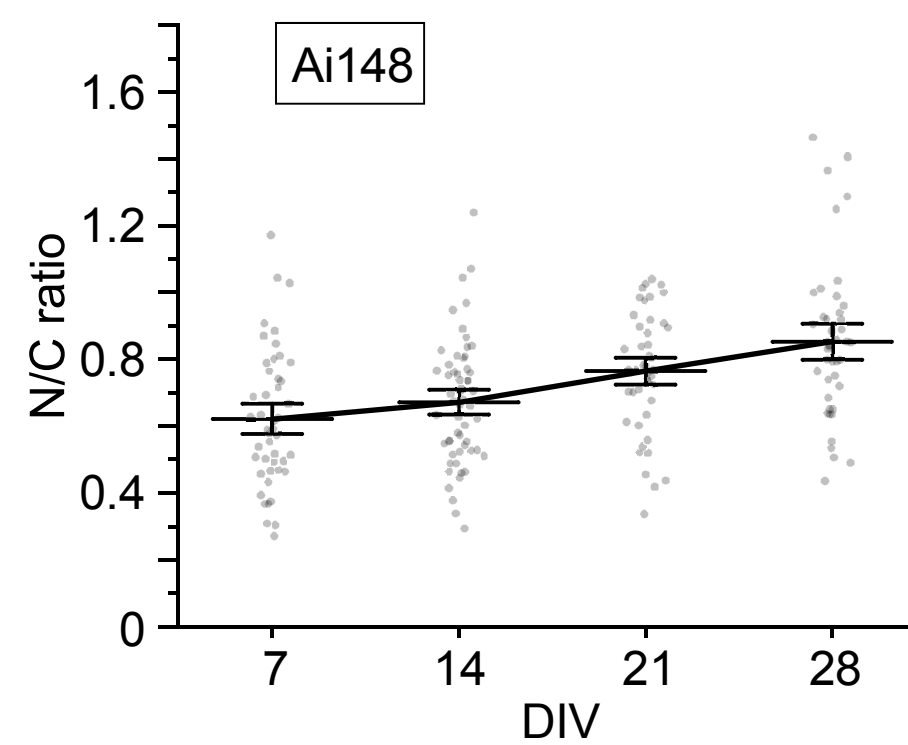**C**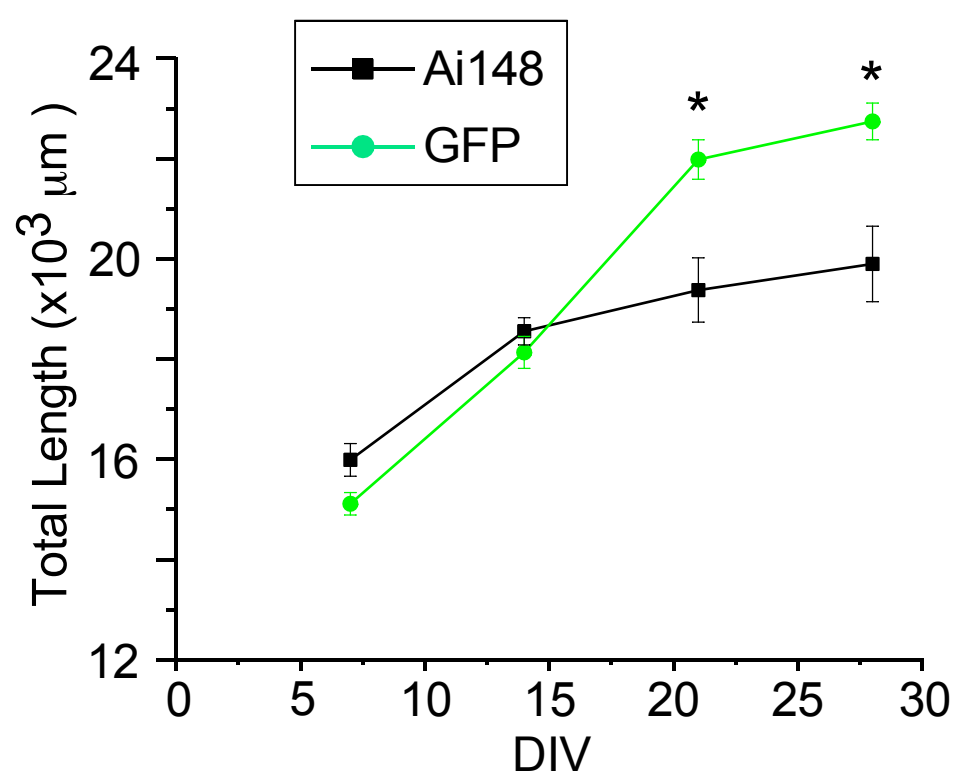**D**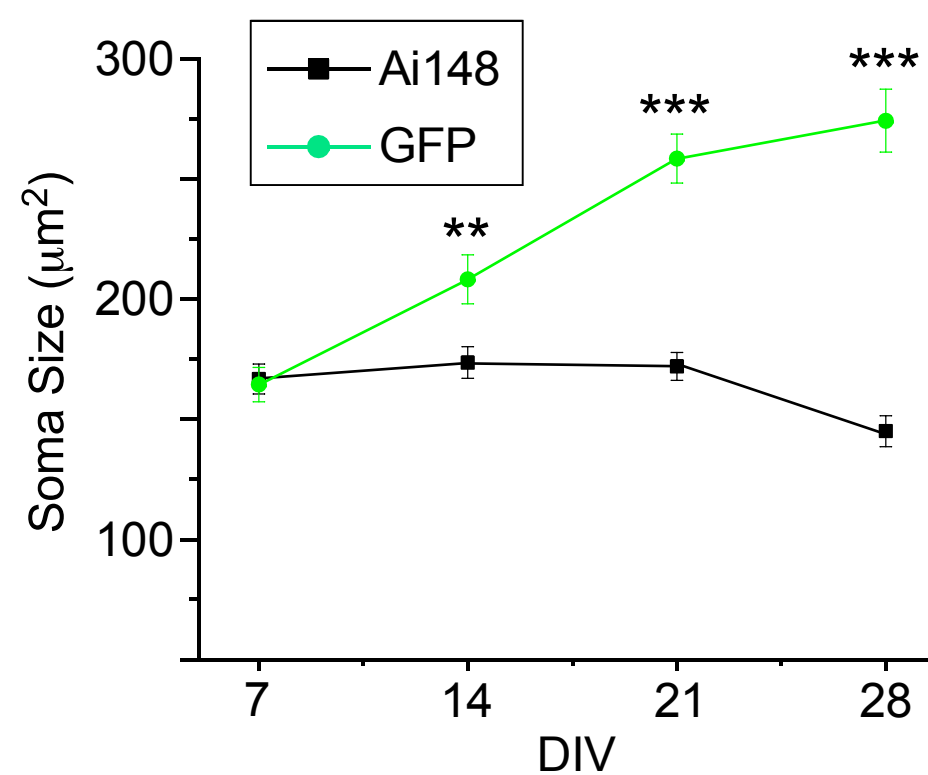**E**

Ai148 Neurons, DIV 28

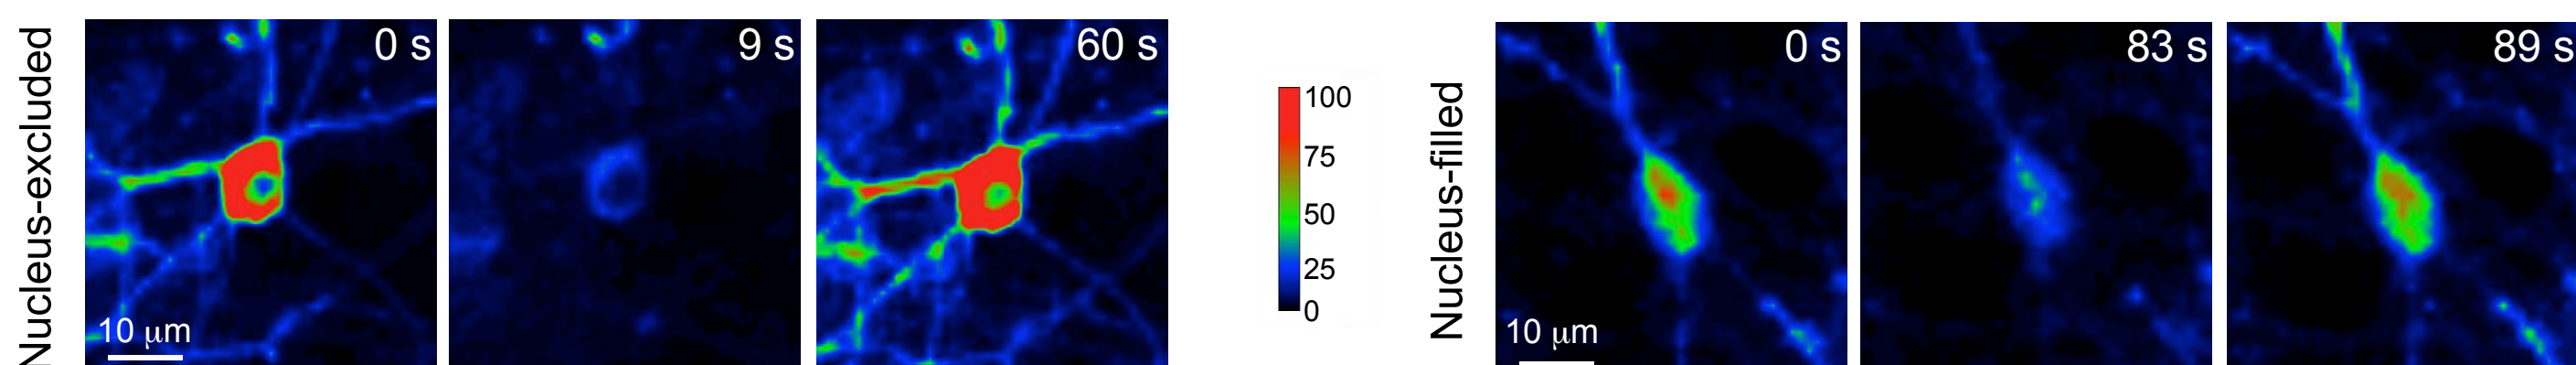**F**

DIV 7

DIV 14

DIV 21

DIV 28

Nucleus-excluded

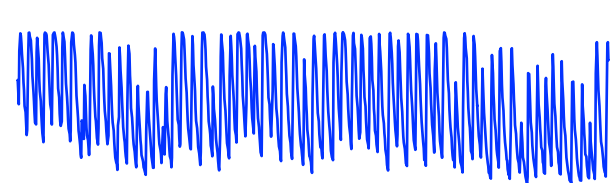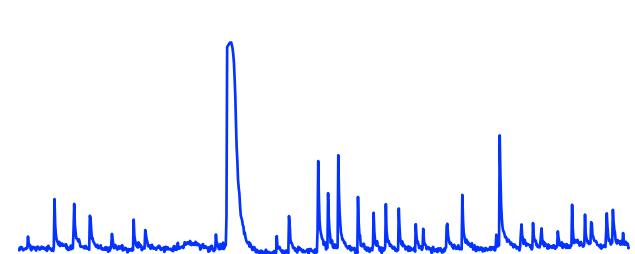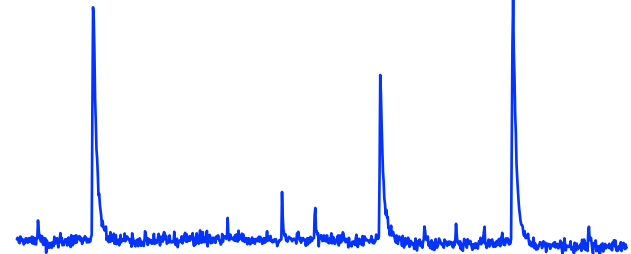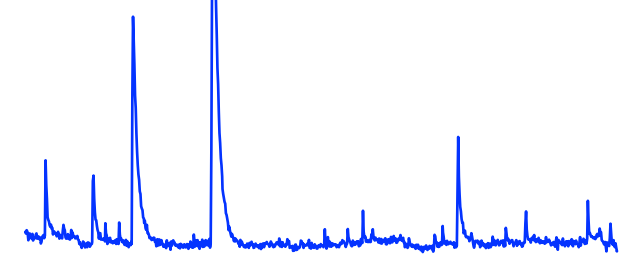

Nucleus-filled

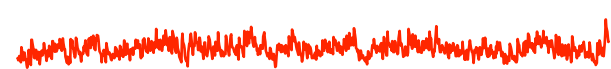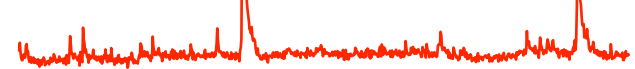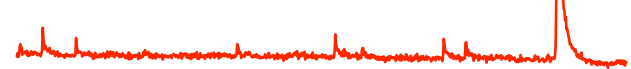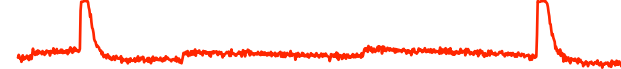
 $0.5 \Delta F/F_0$  | 50 s
**G**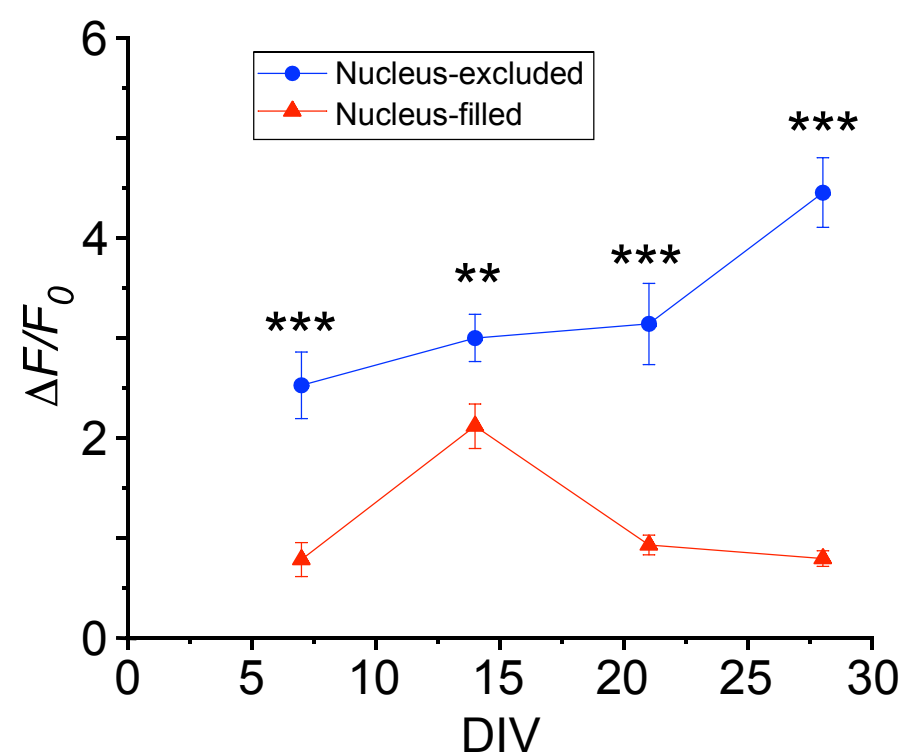**H**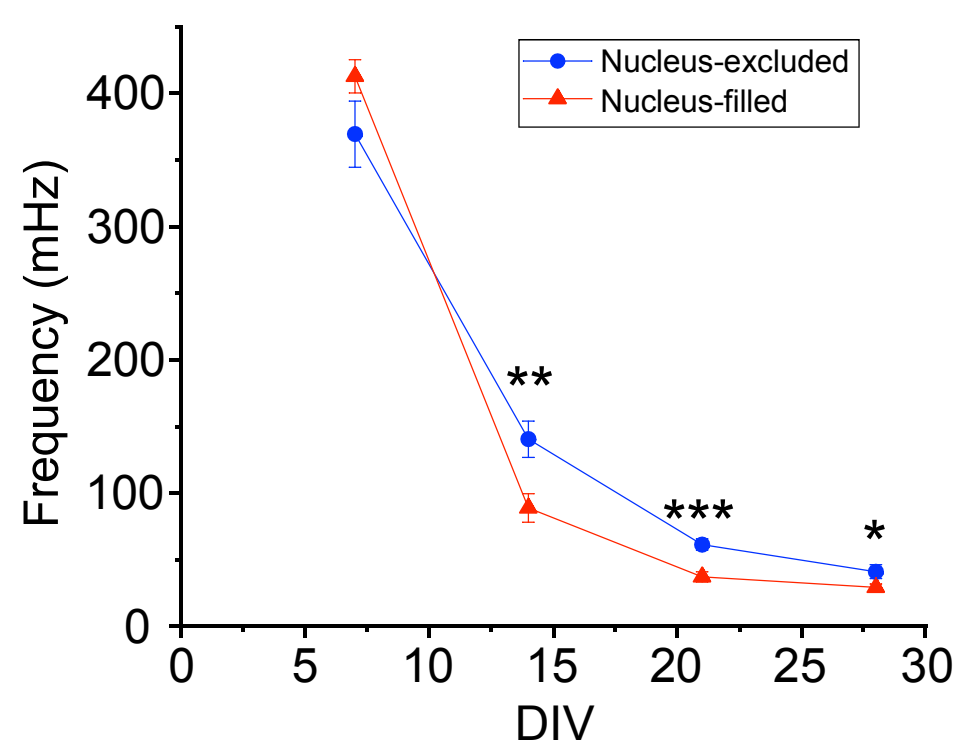

Supplement: supp [file elife-76691-supp-v1.zip]
