# Supplementary figures and images for: Chronic Ca2+ imaging of cortical neurons with long-term expression of GCaMP-X
Source: eLife journal article supplement (doi:10.7554/elife.76691), 2022-10-05

**A**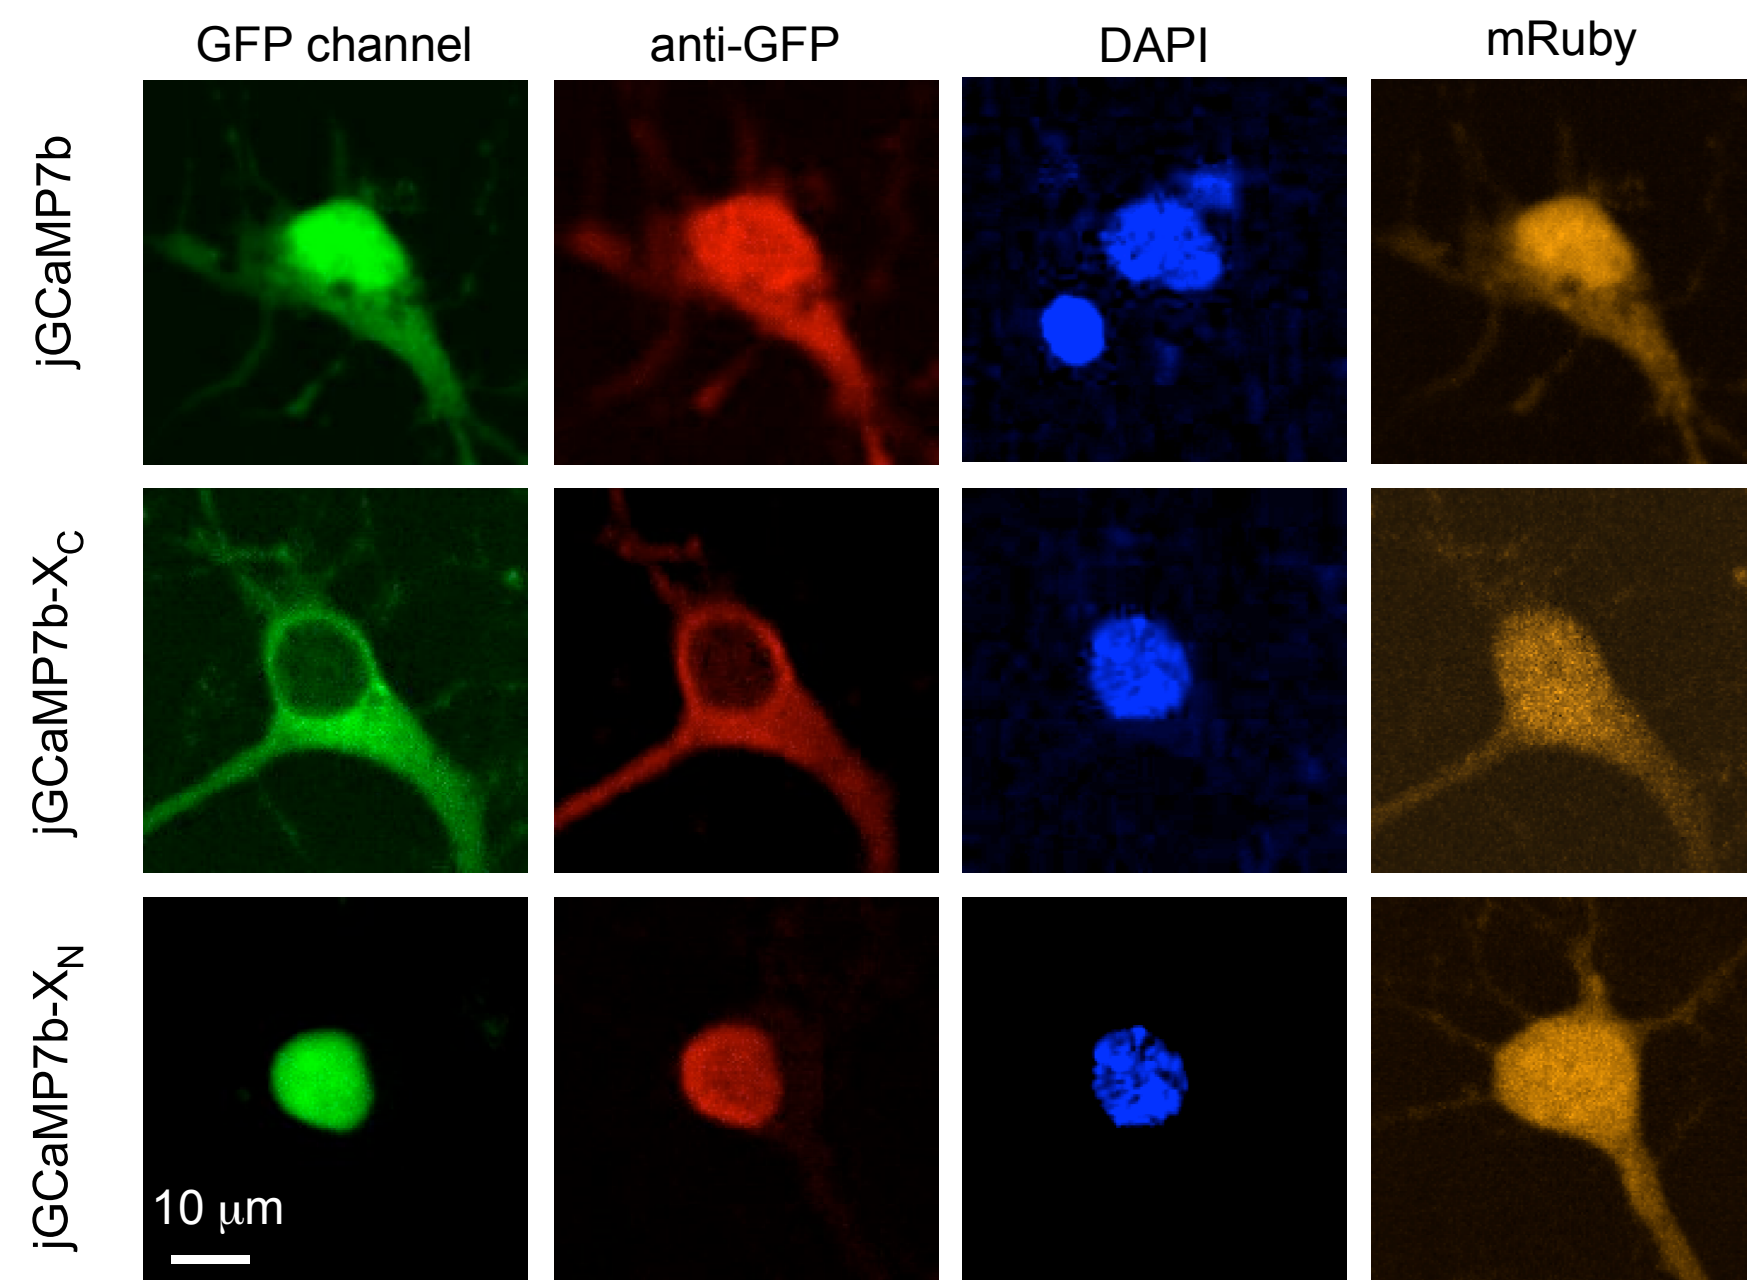**B**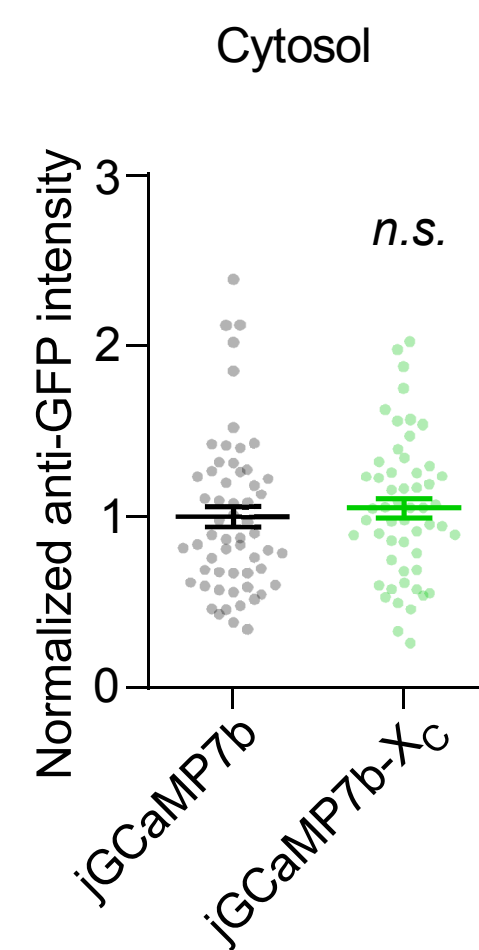**C**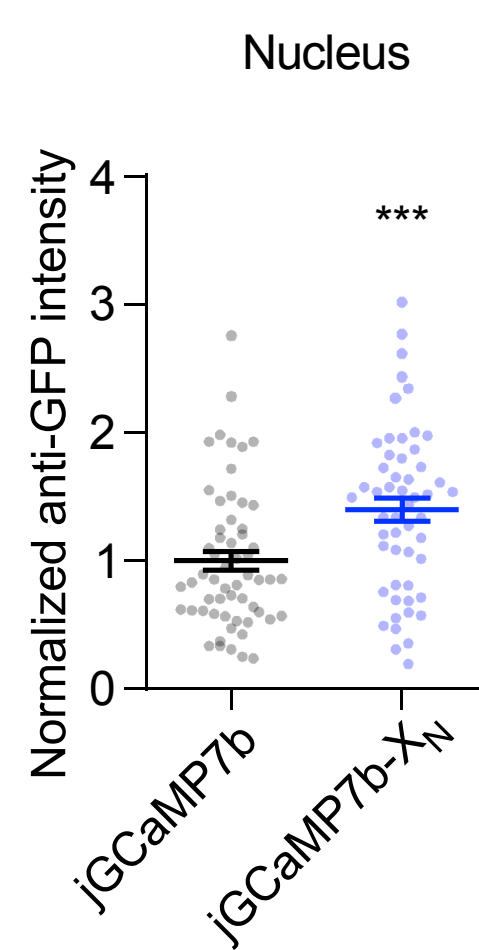**D**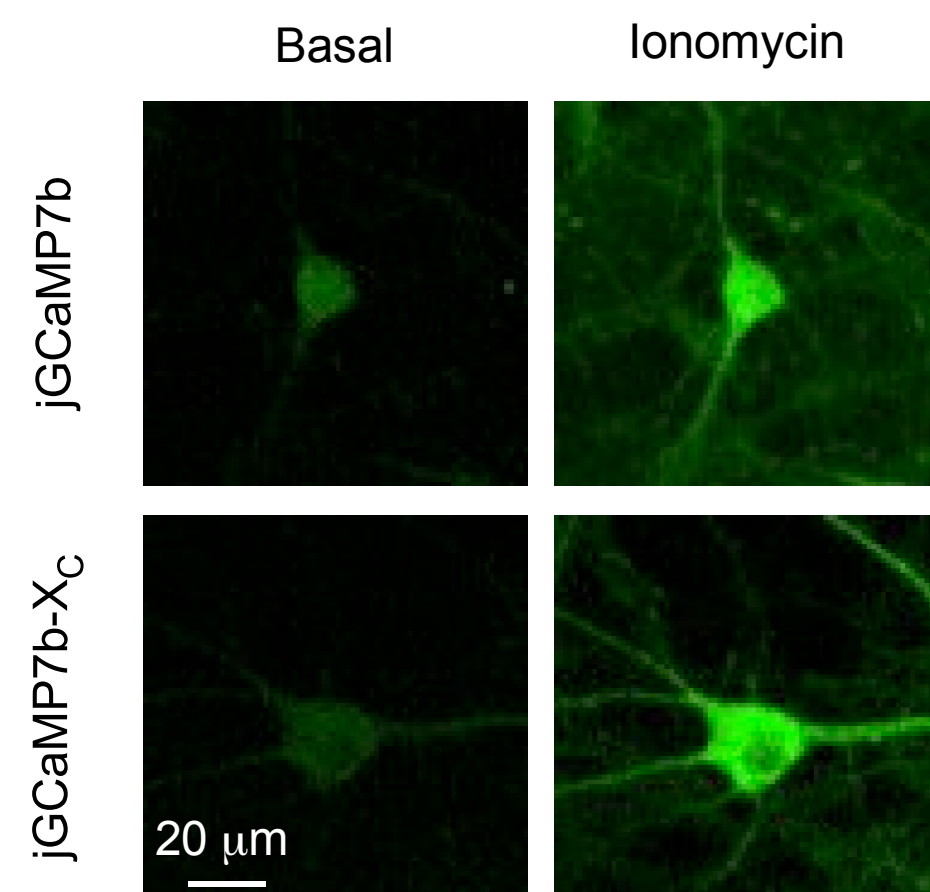**E**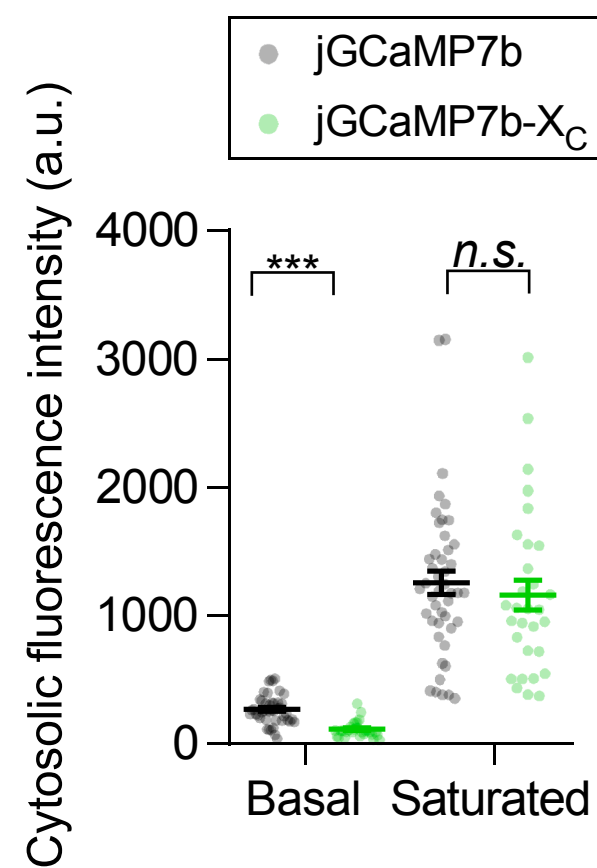**F**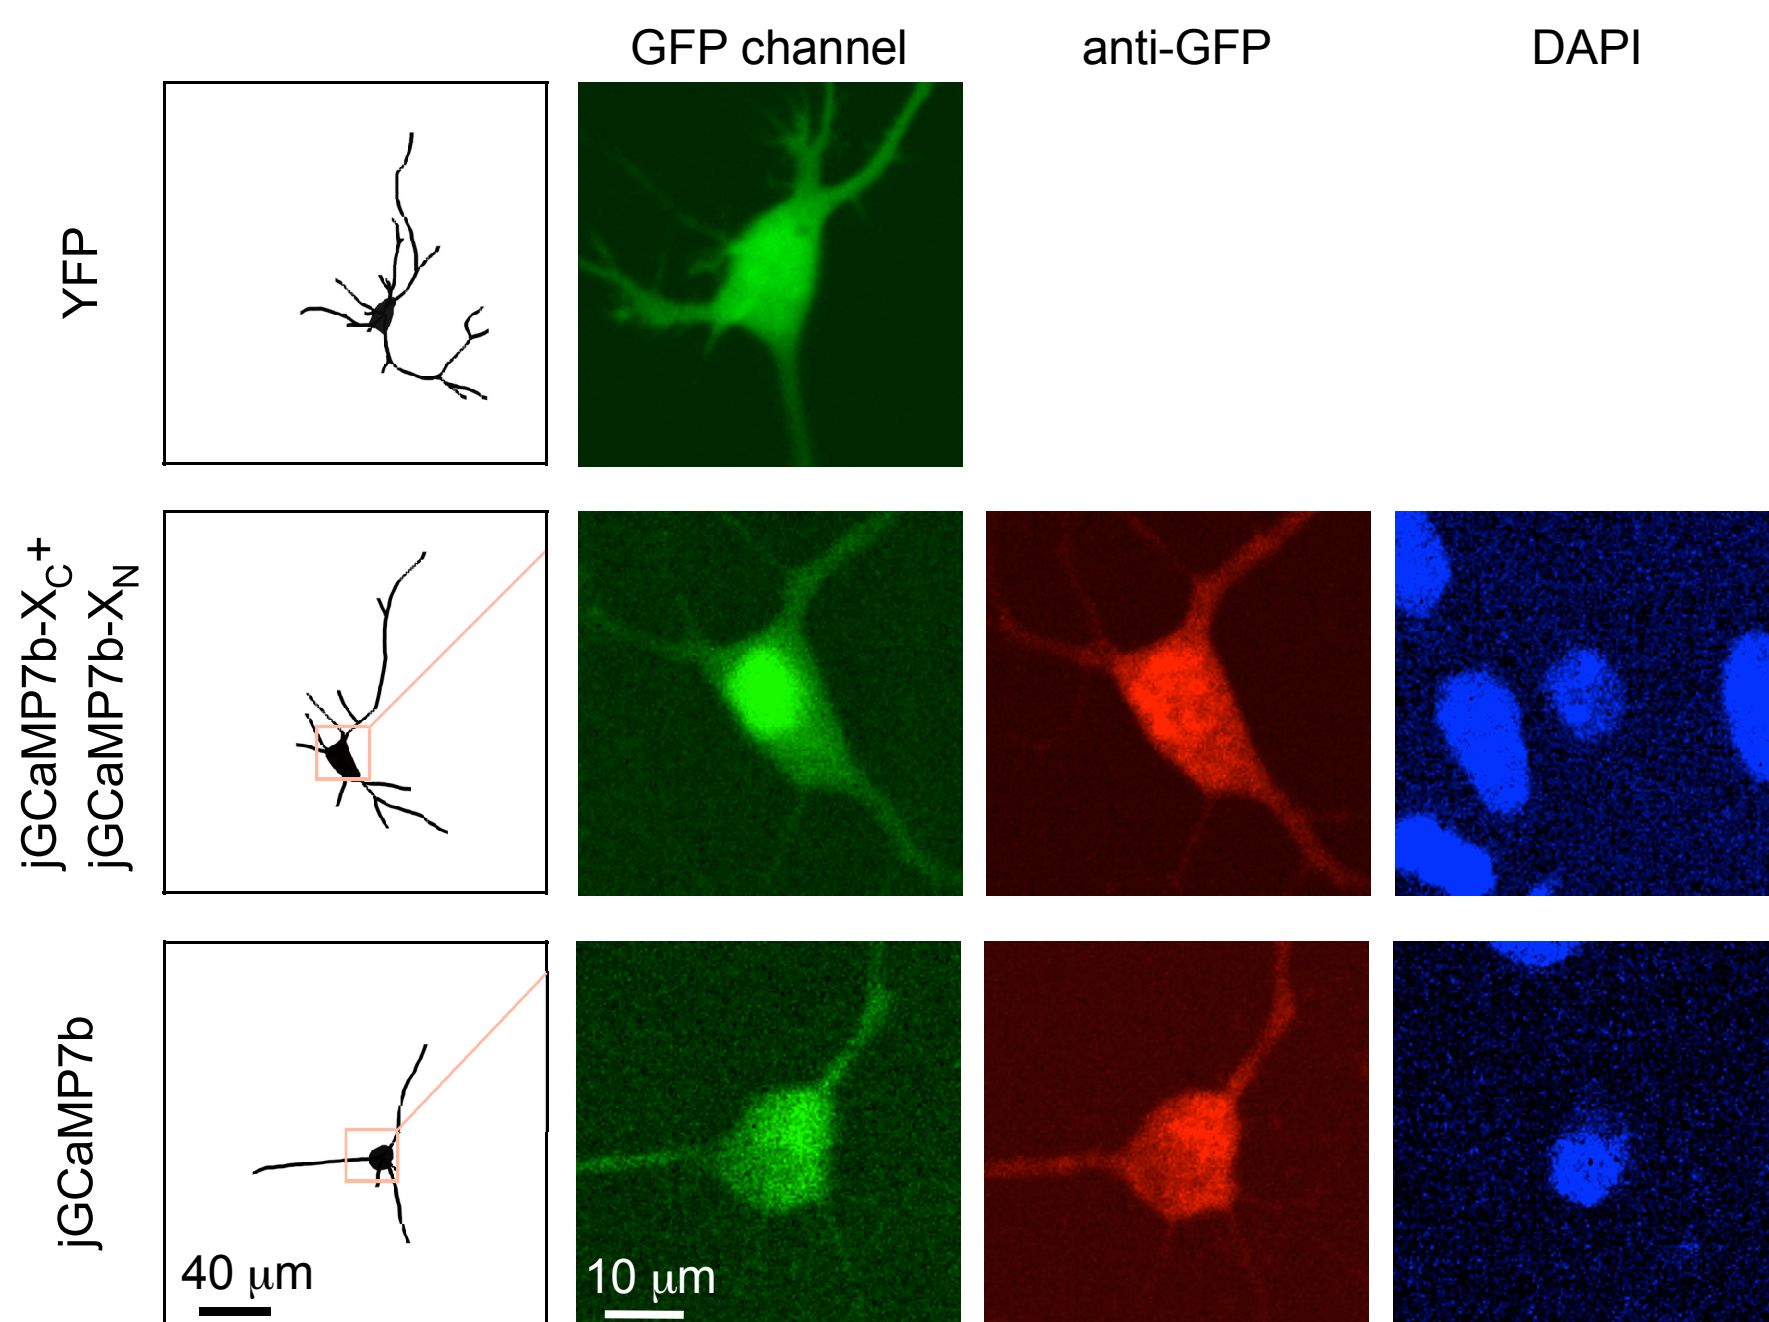**G**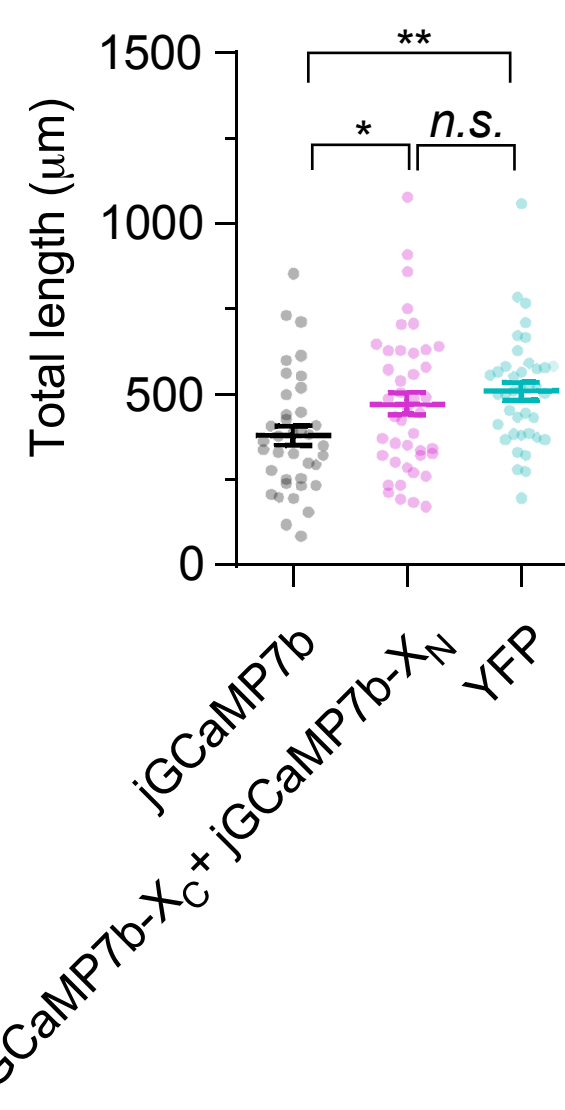**H**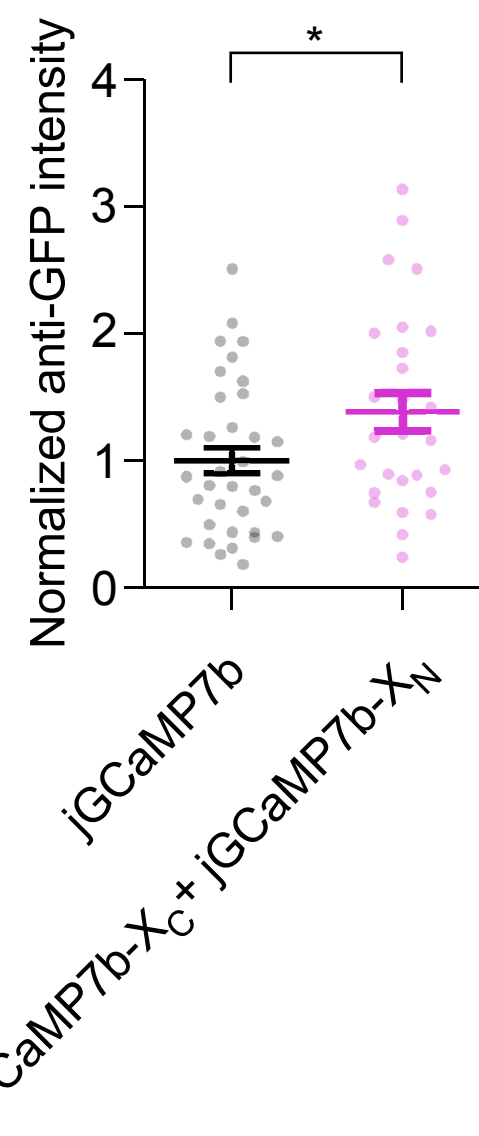

Supplement: supp [file elife-76691-supp-v1.zip]

**A**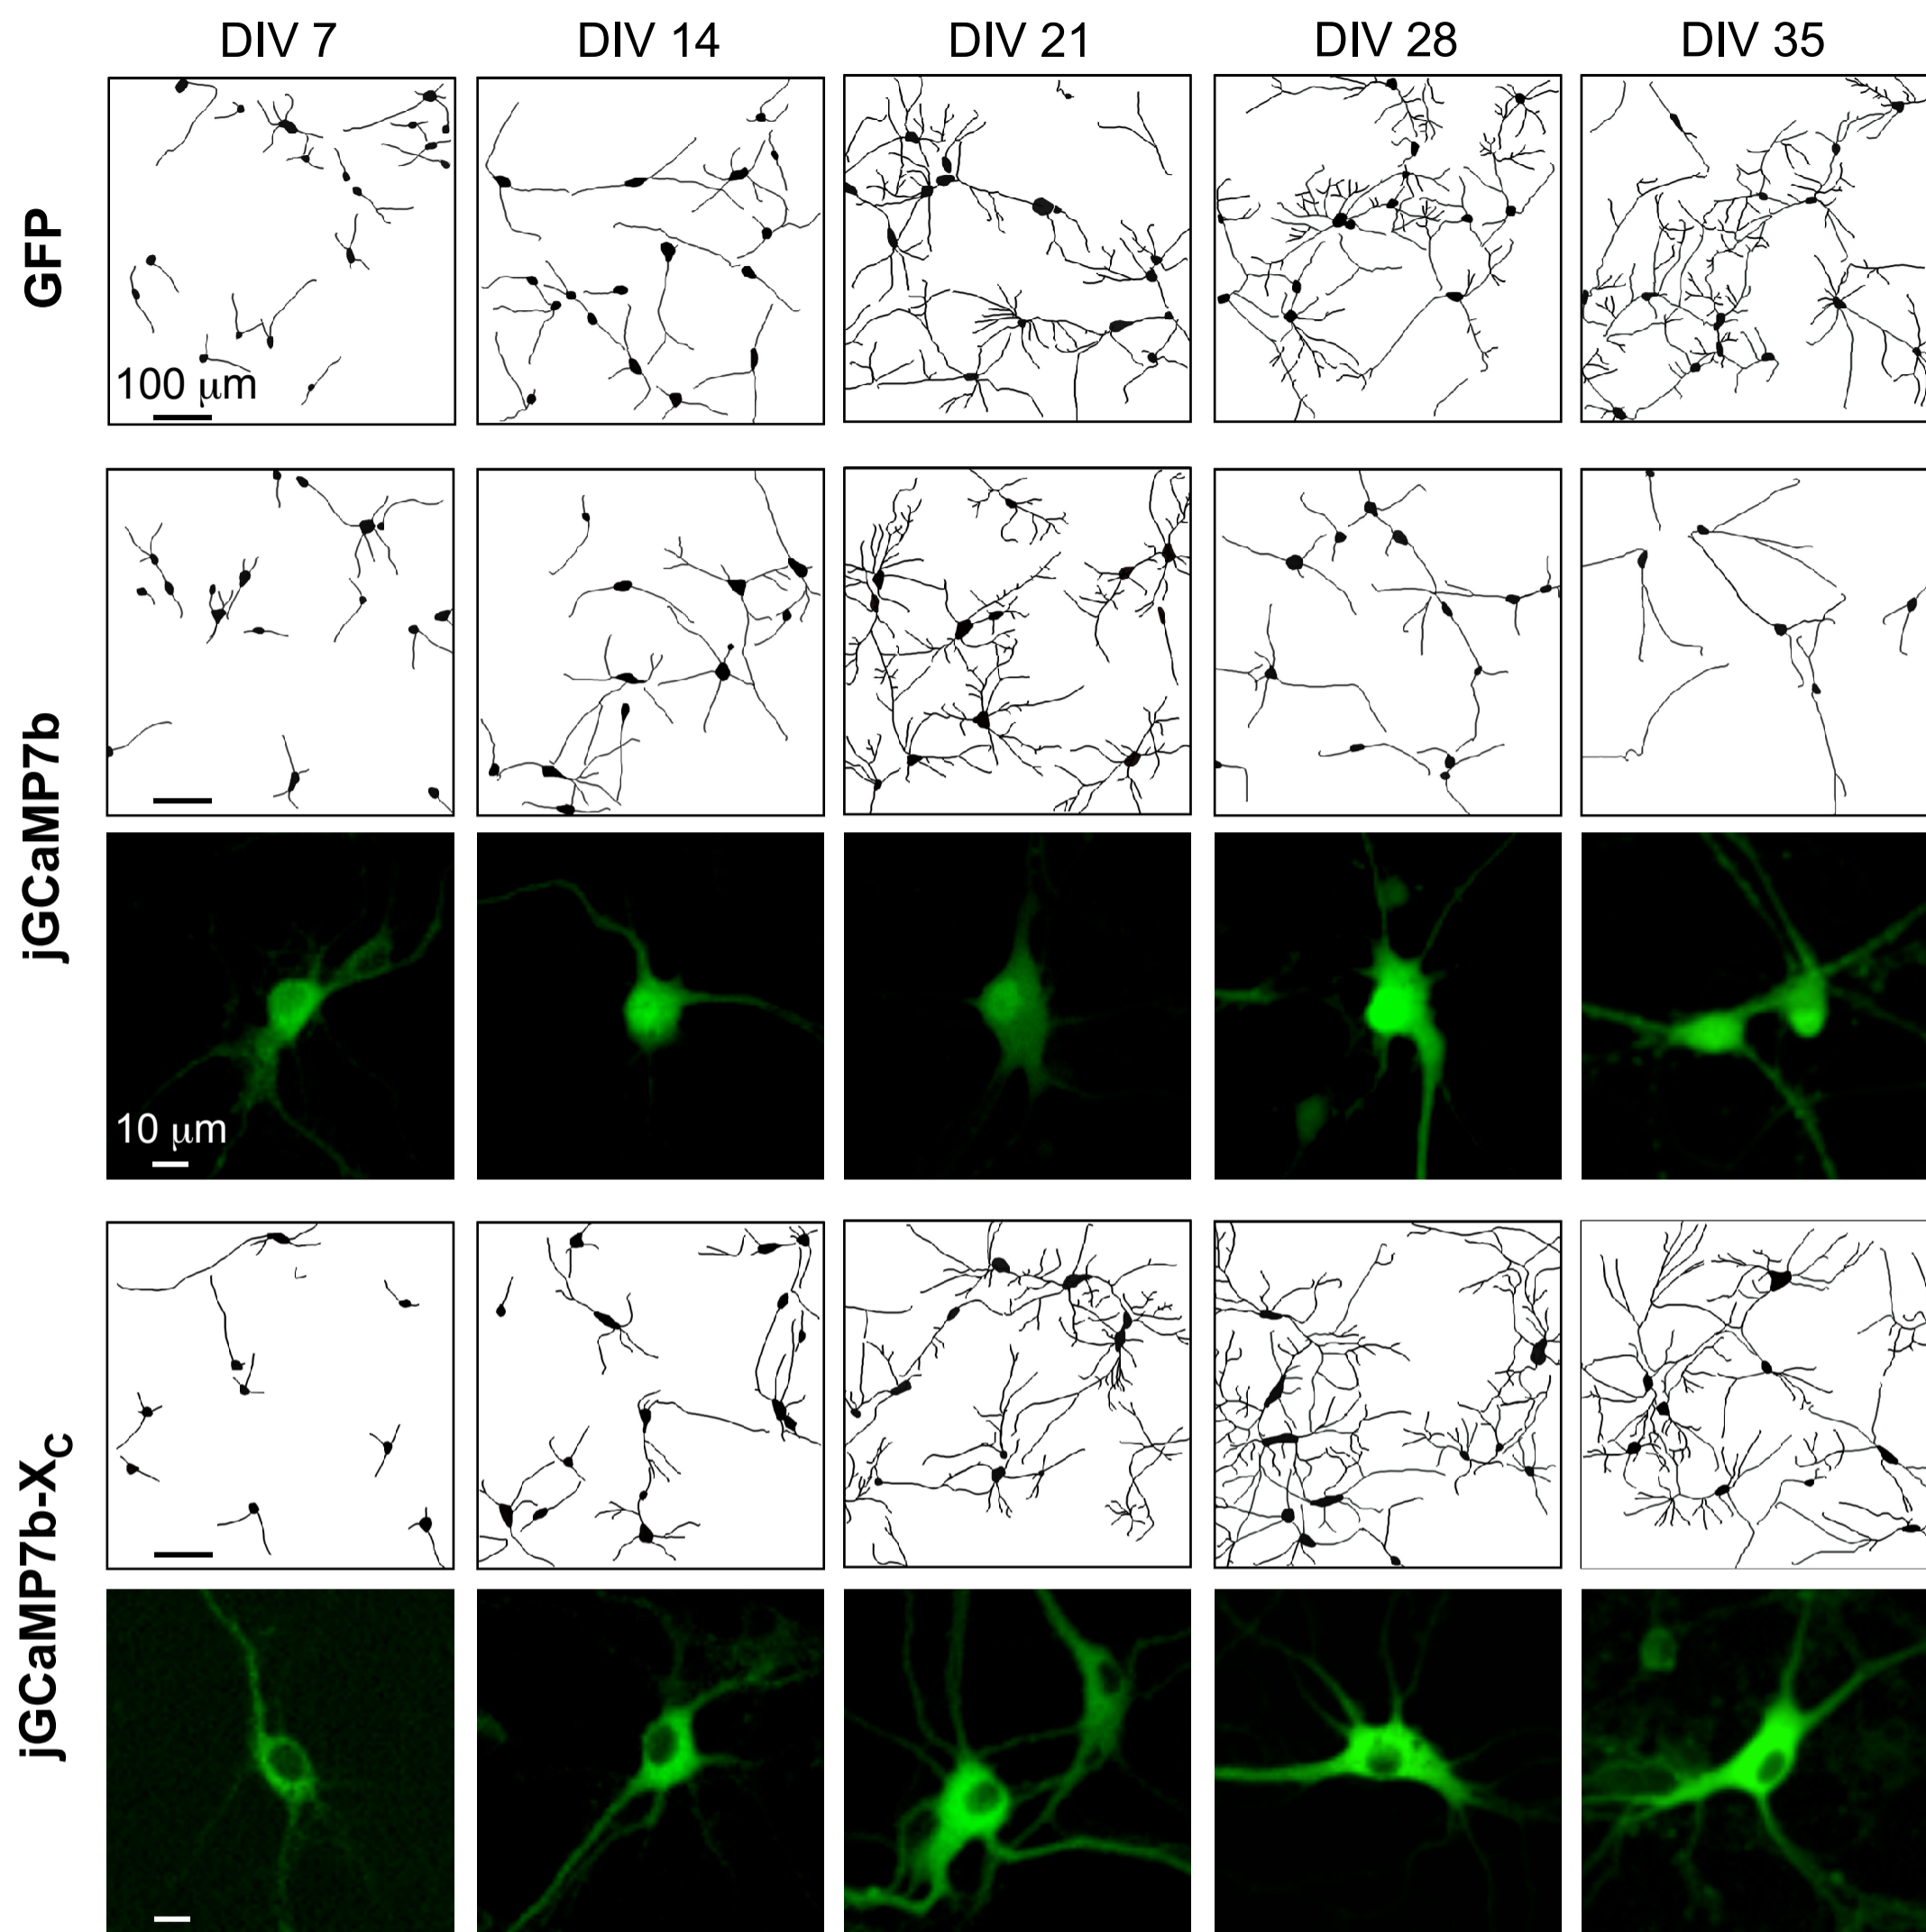**B**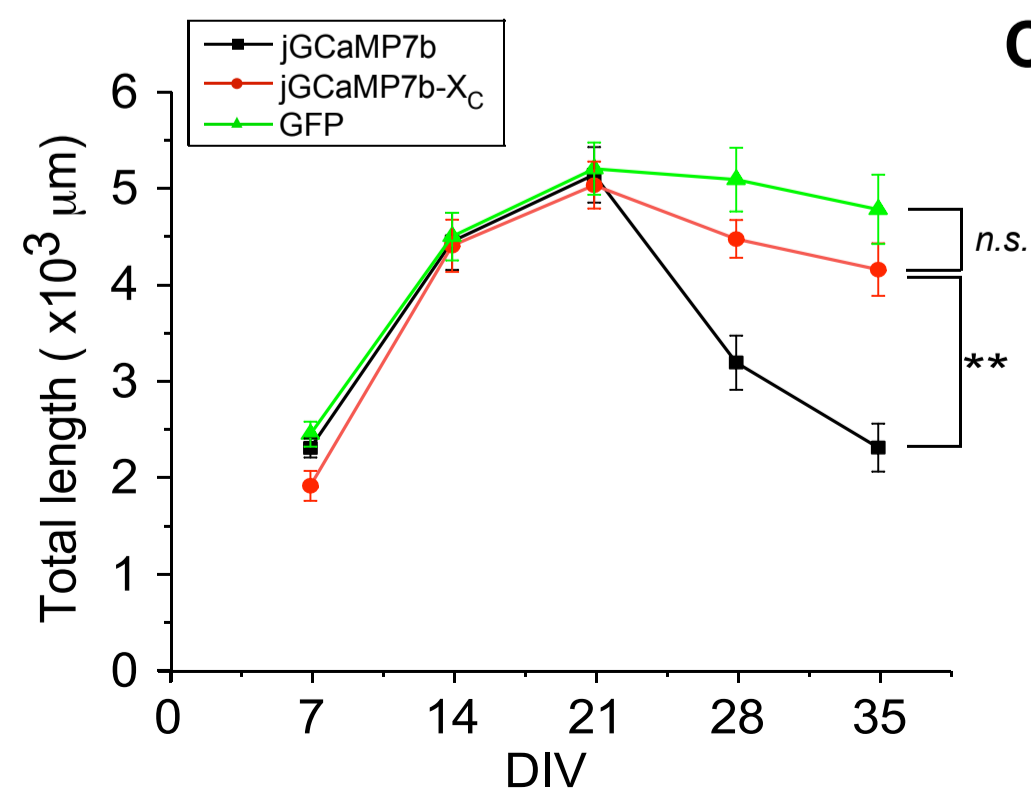**C**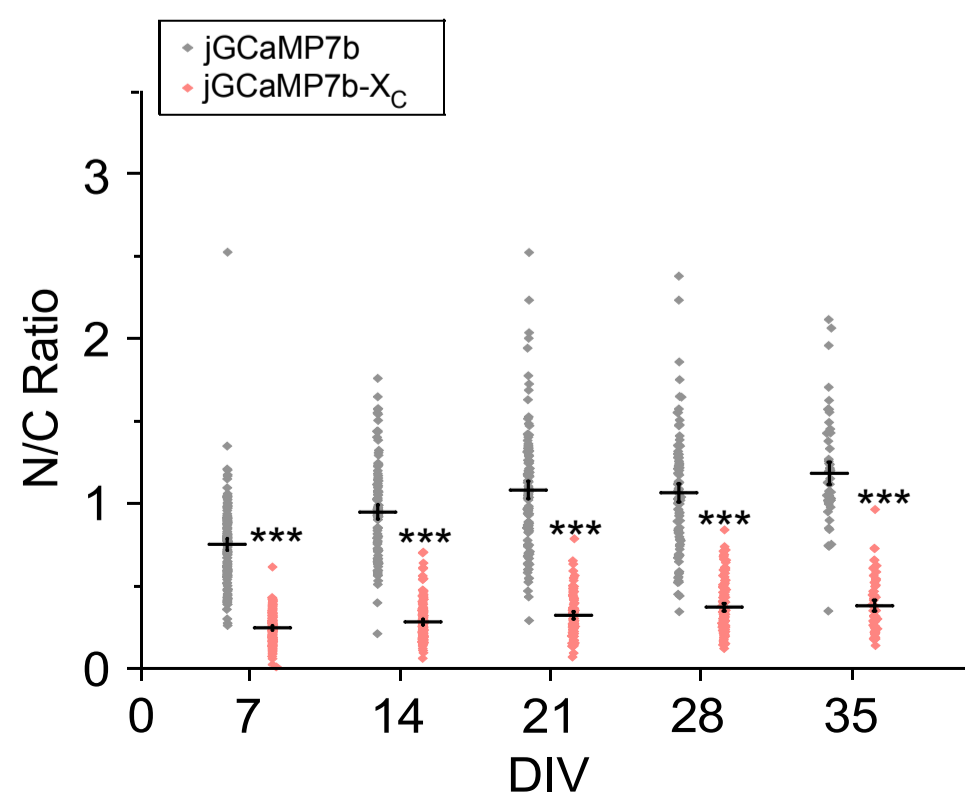

Supplement: supp [file elife-76691-supp-v1.zip]

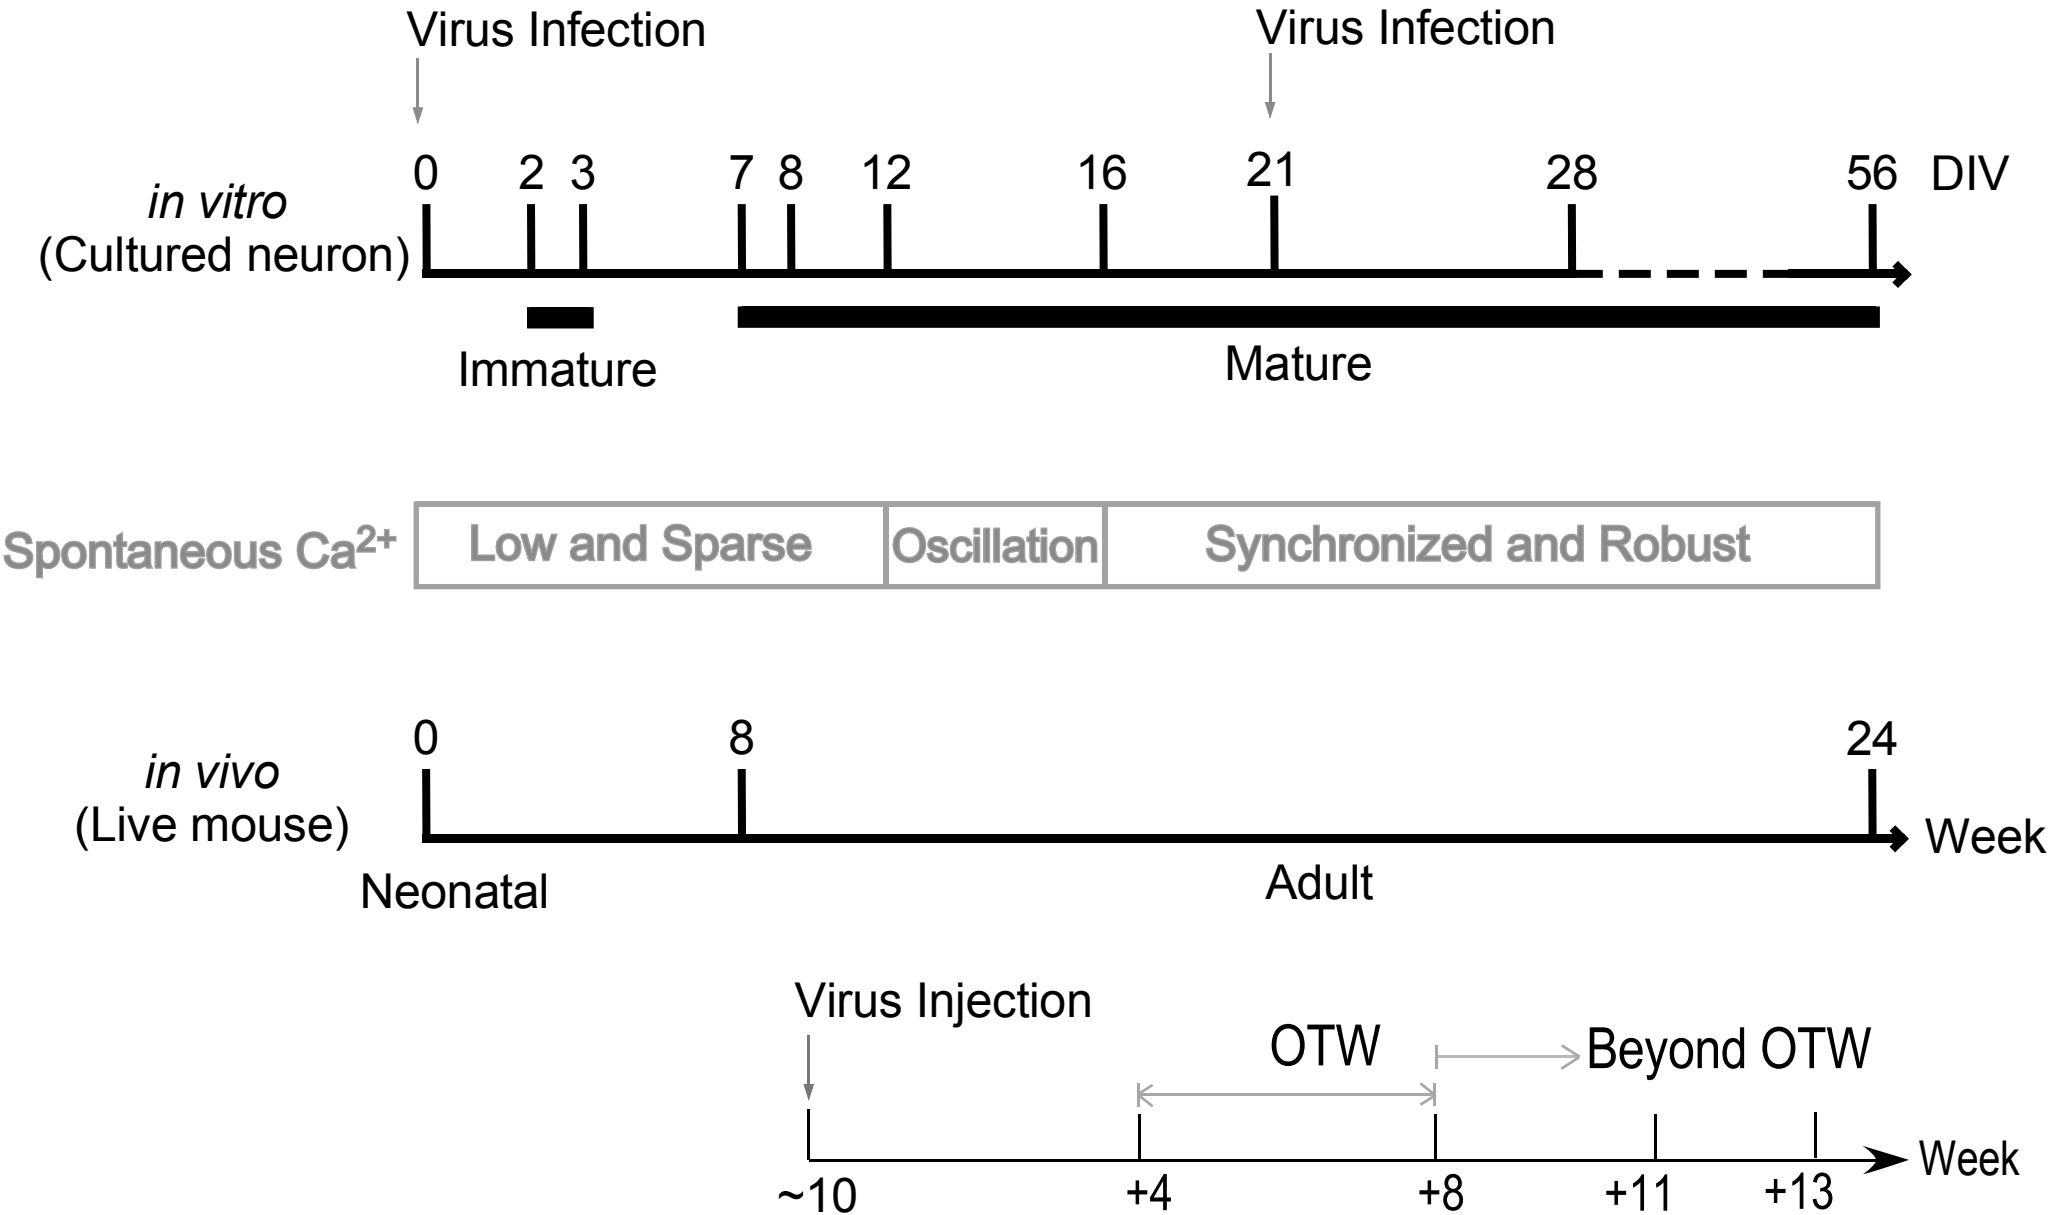

Supplement: supp [file elife-76691-supp-v1.zip]

**A**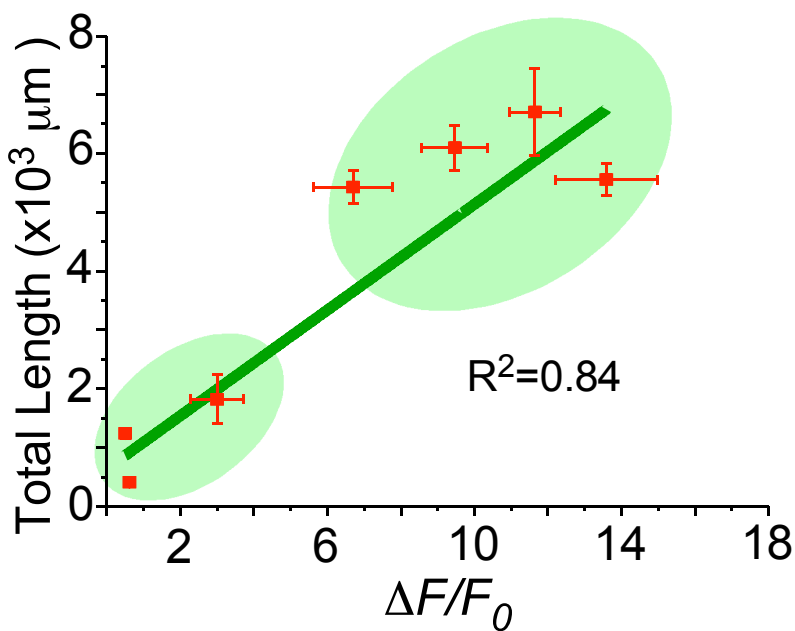**B**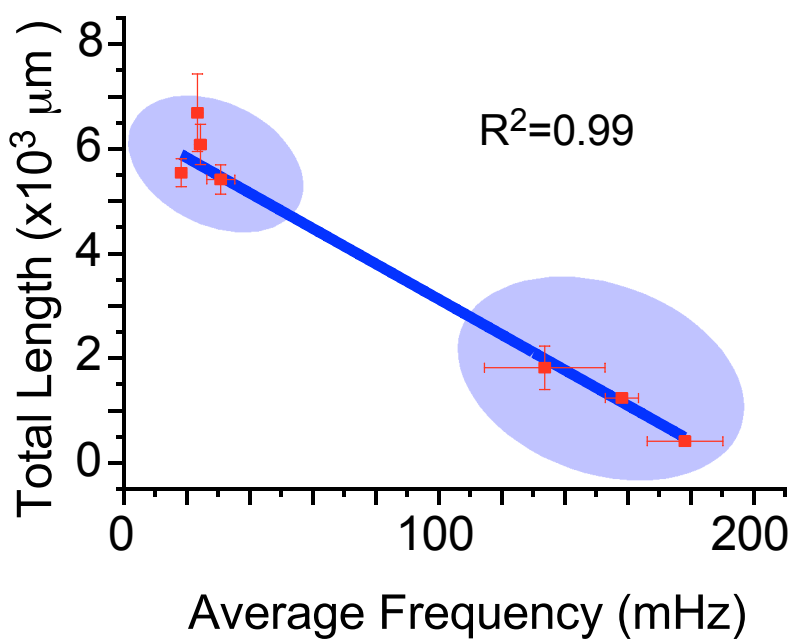**C**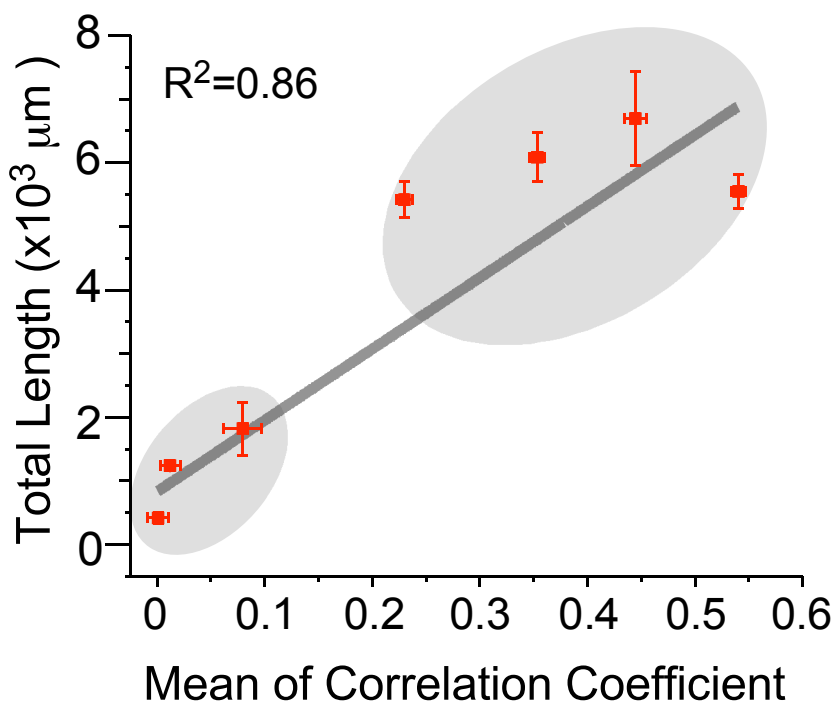

Supplement: supp [file elife-76691-supp-v1.zip]

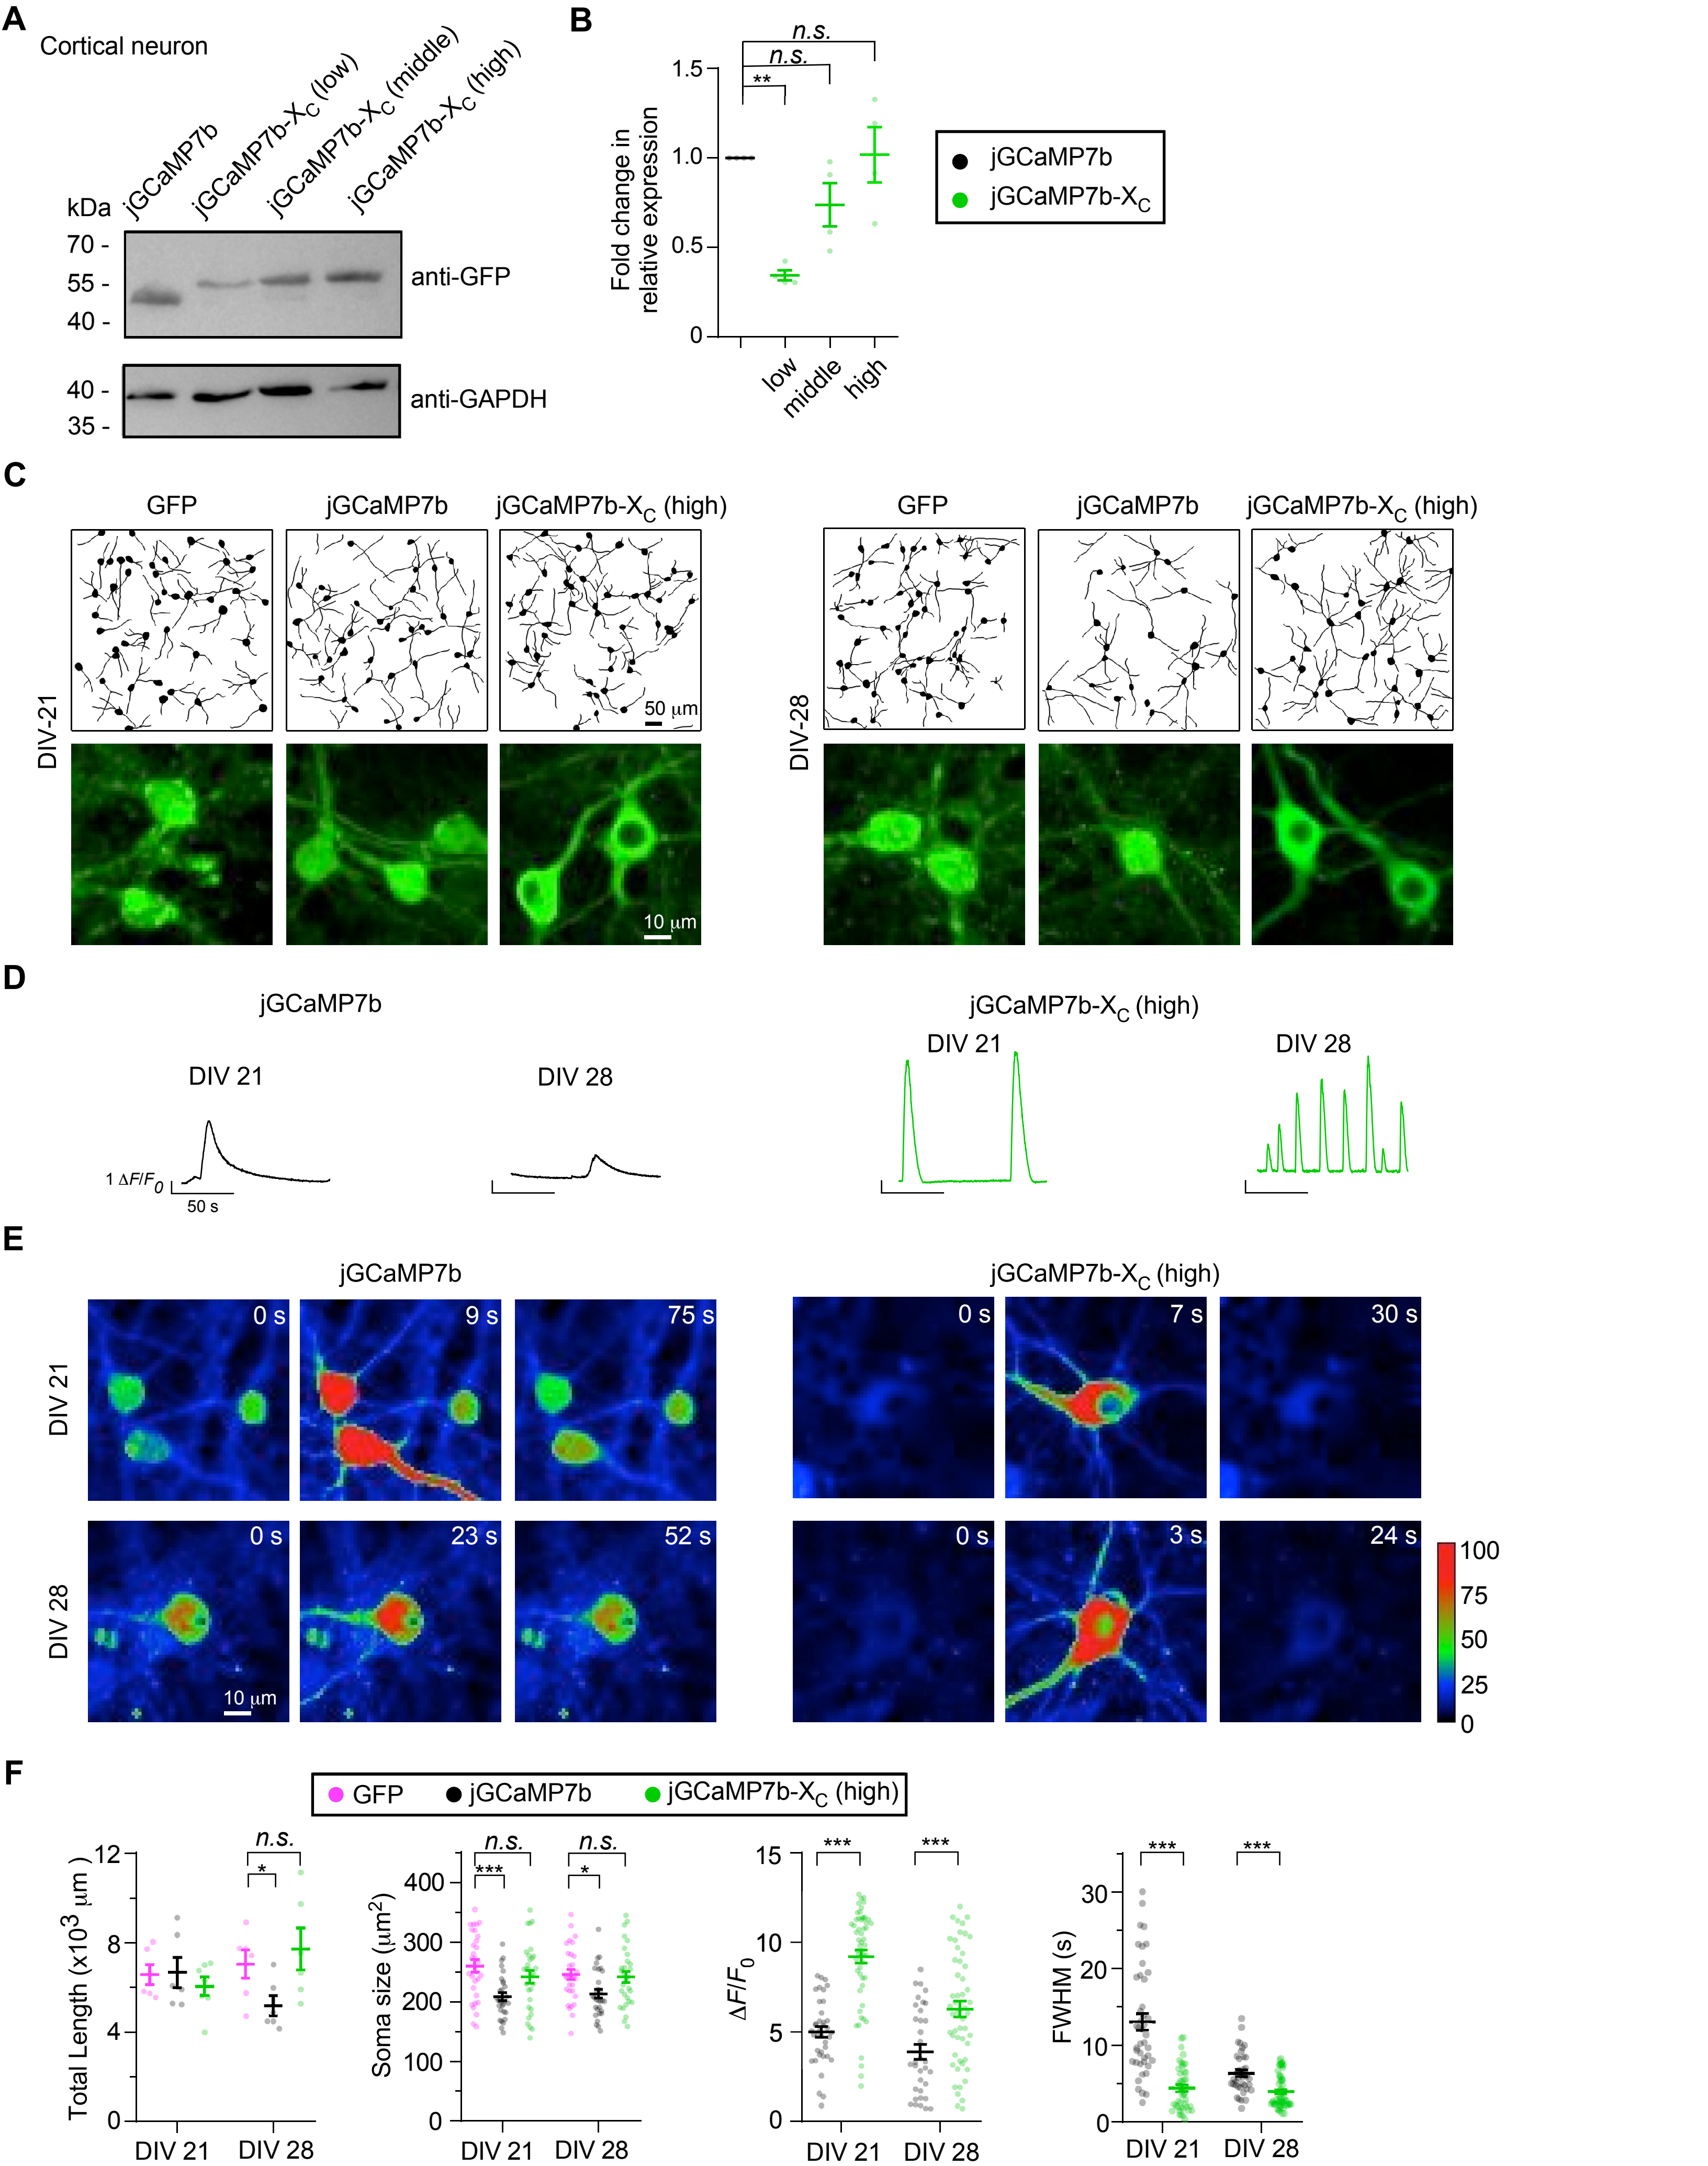

Supplement: supp [file elife-76691-supp-v1.zip]

**A**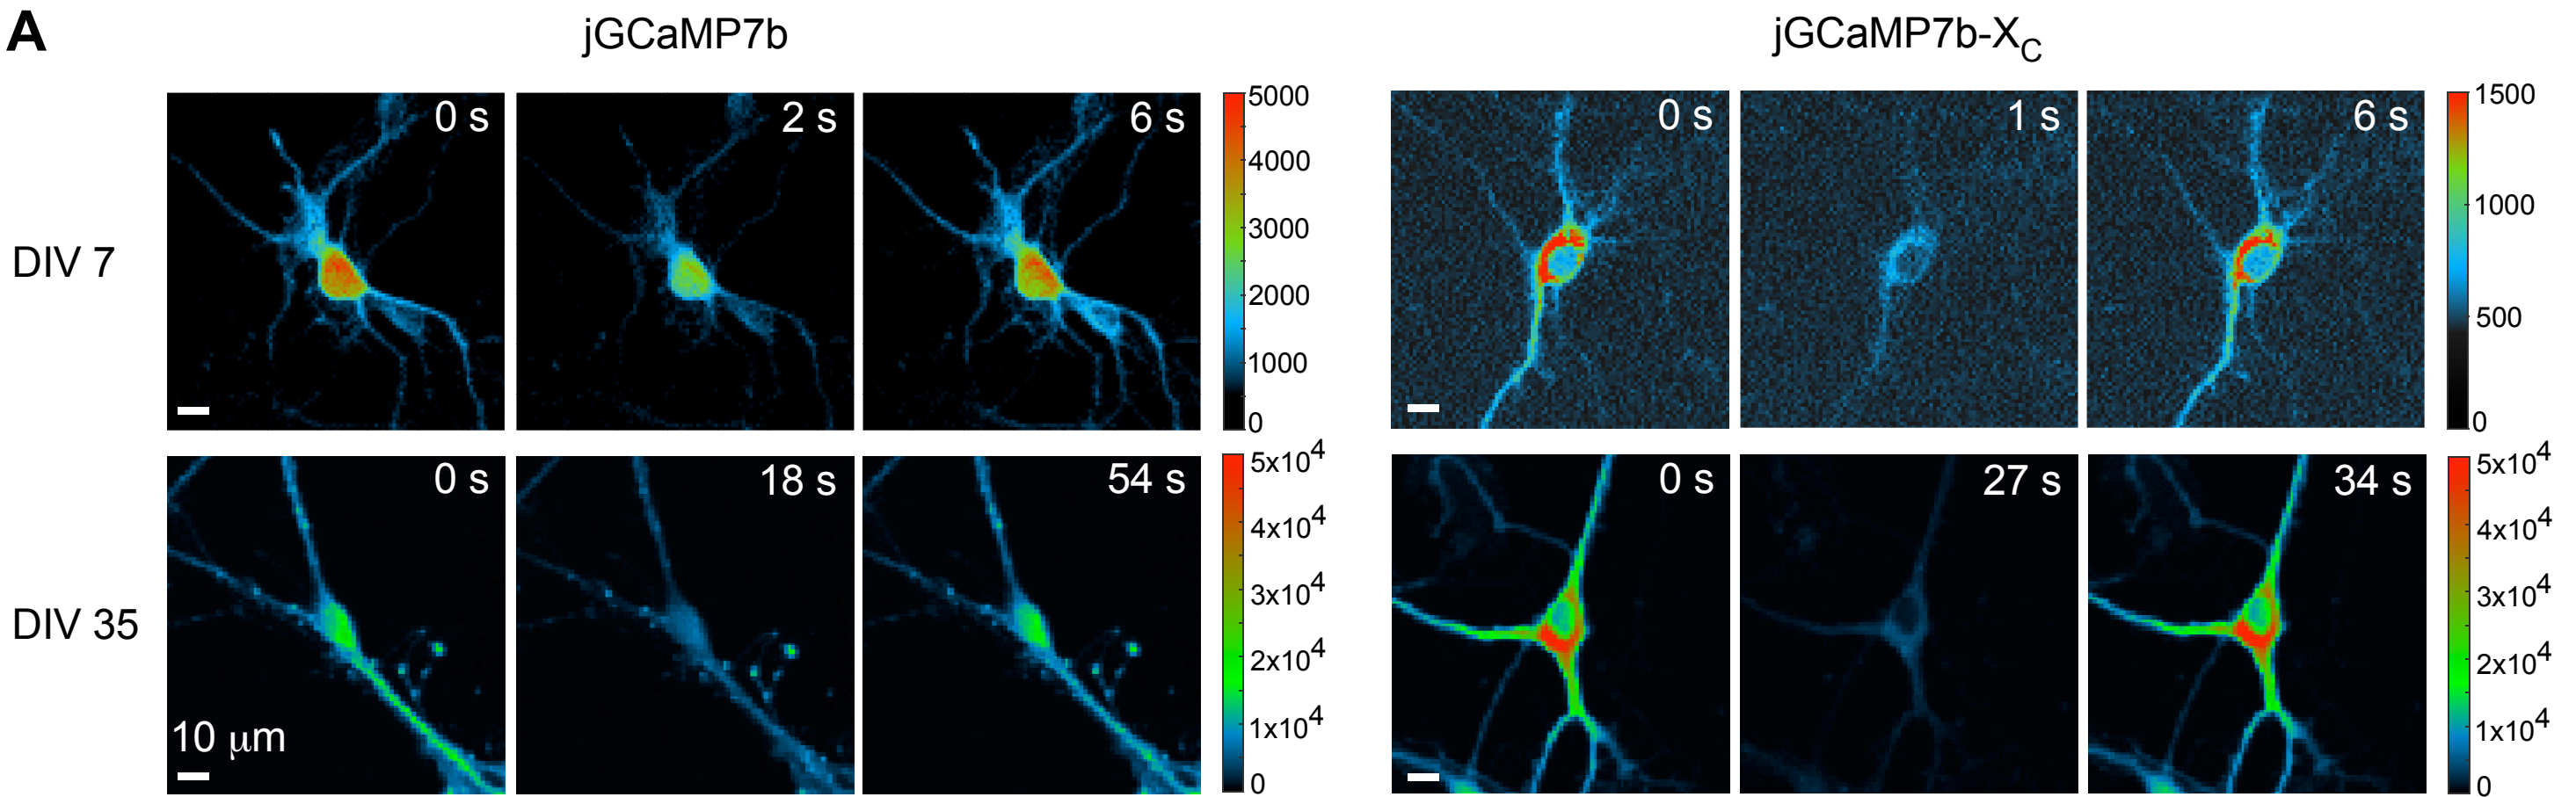**B**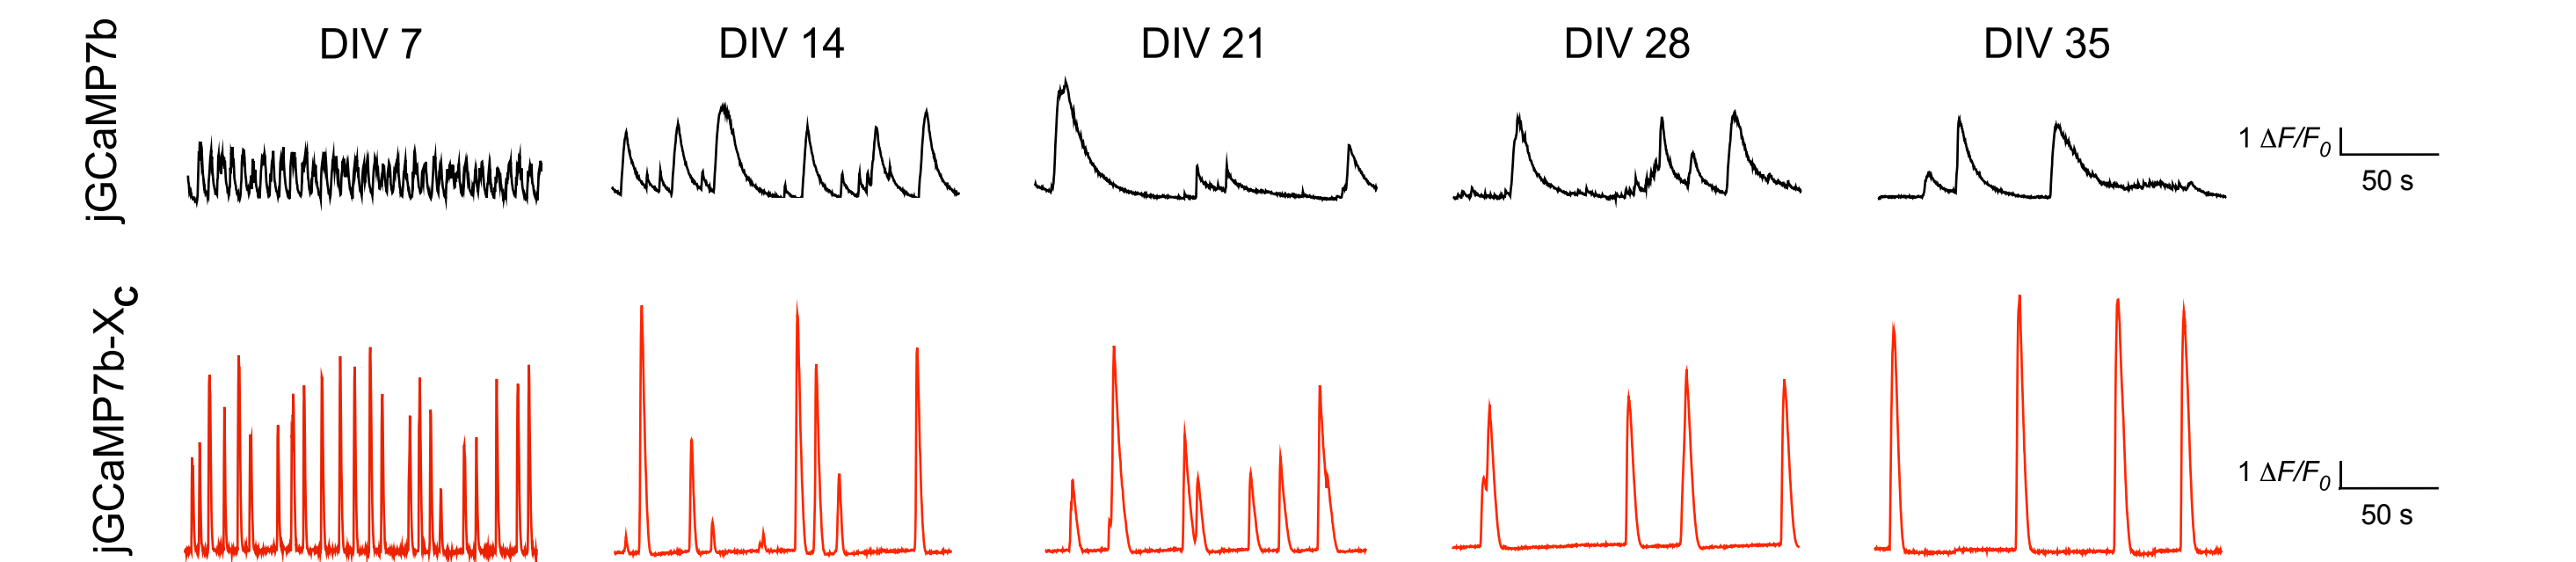**C**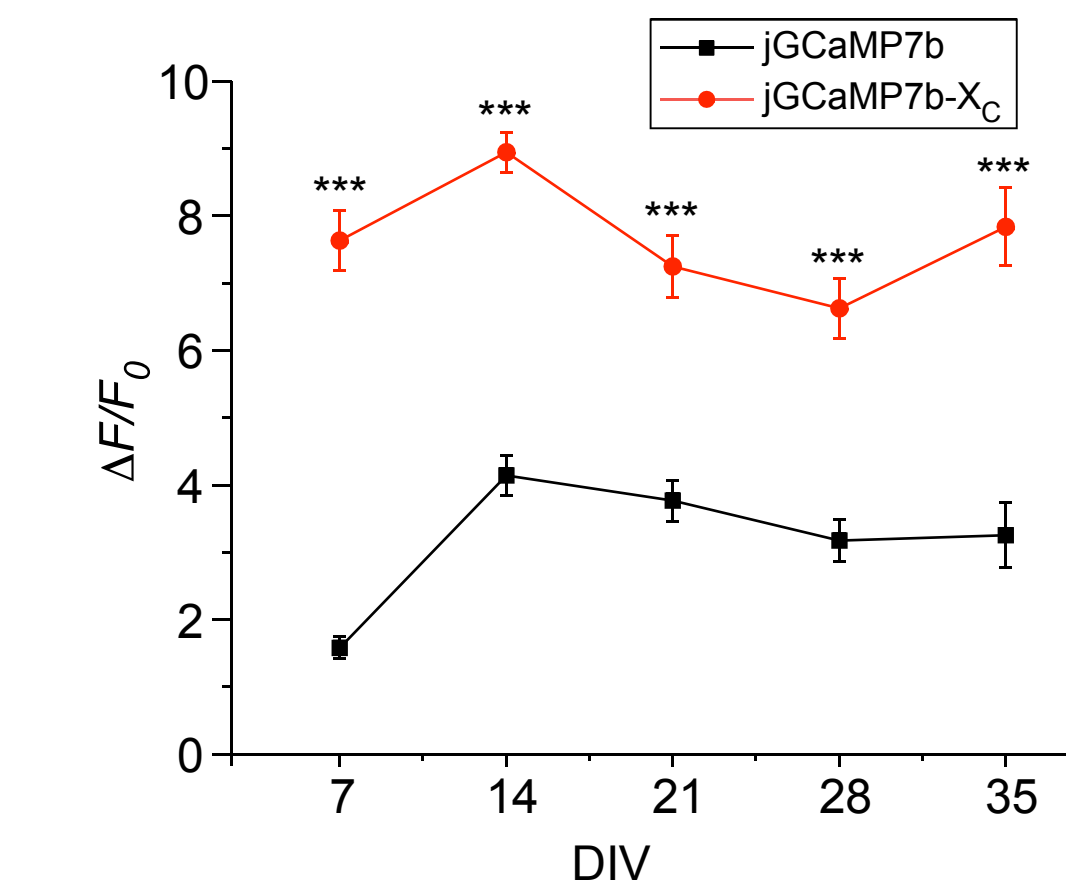

Supplement: supp [file elife-76691-supp-v1.zip]

**A**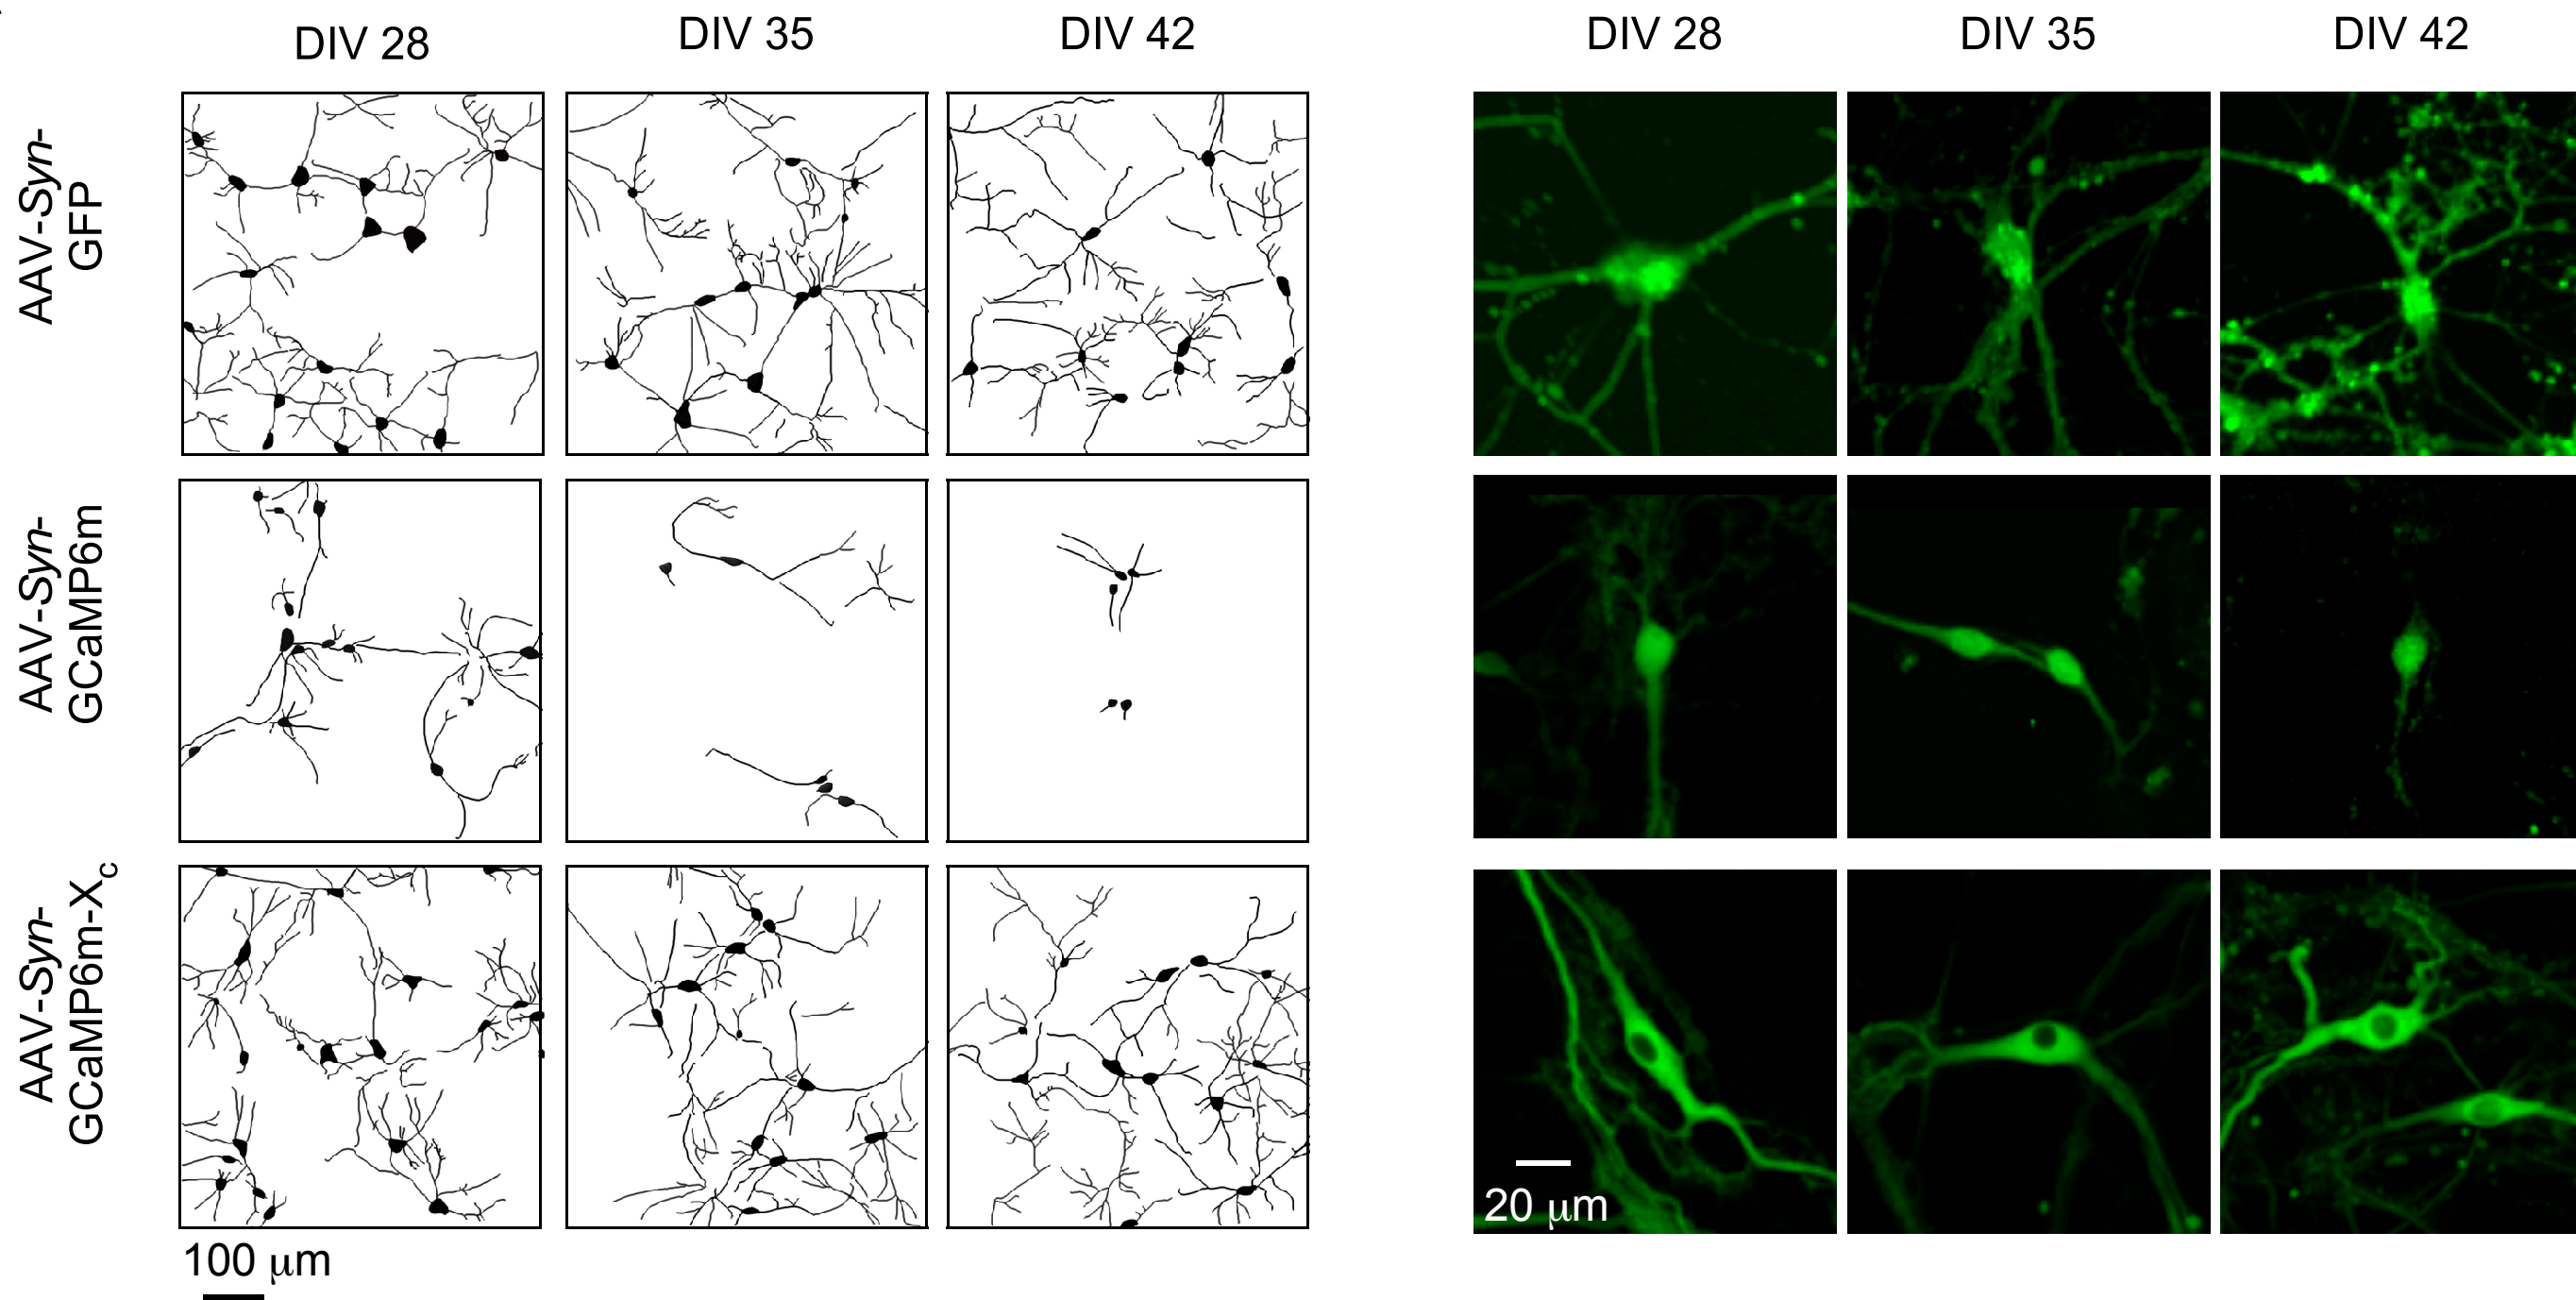**B**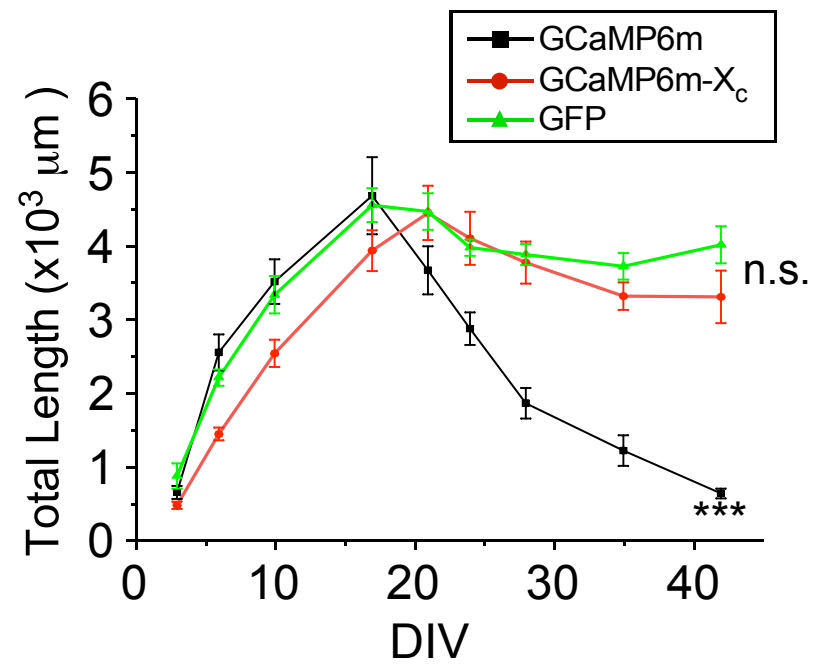**C**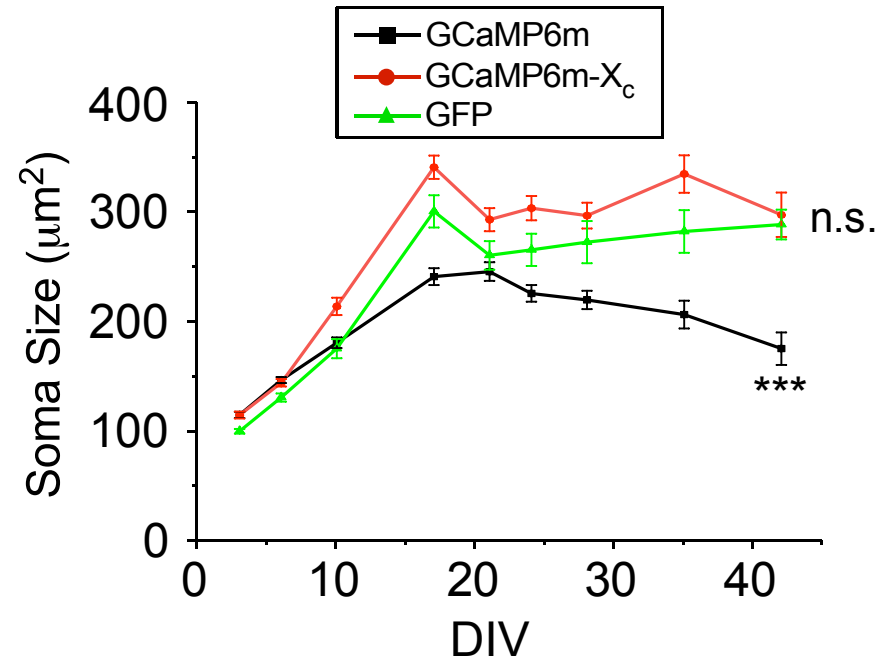

Supplement: supp [file elife-76691-supp-v1.zip]

**A**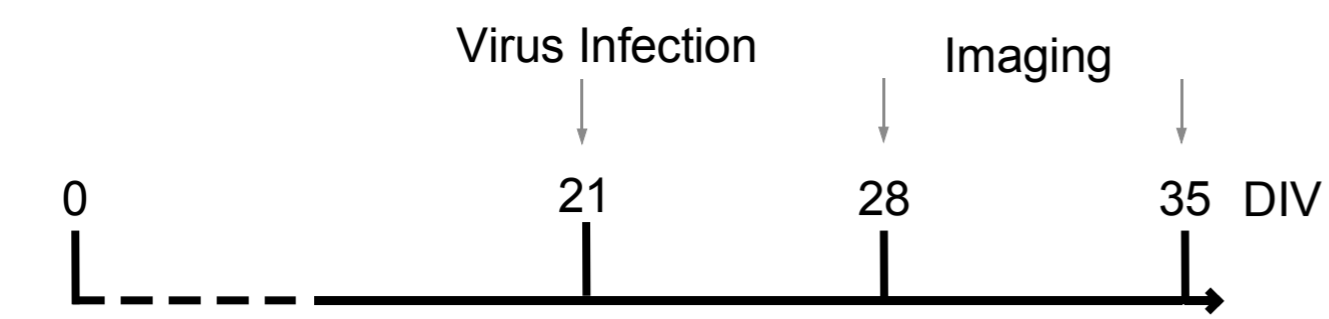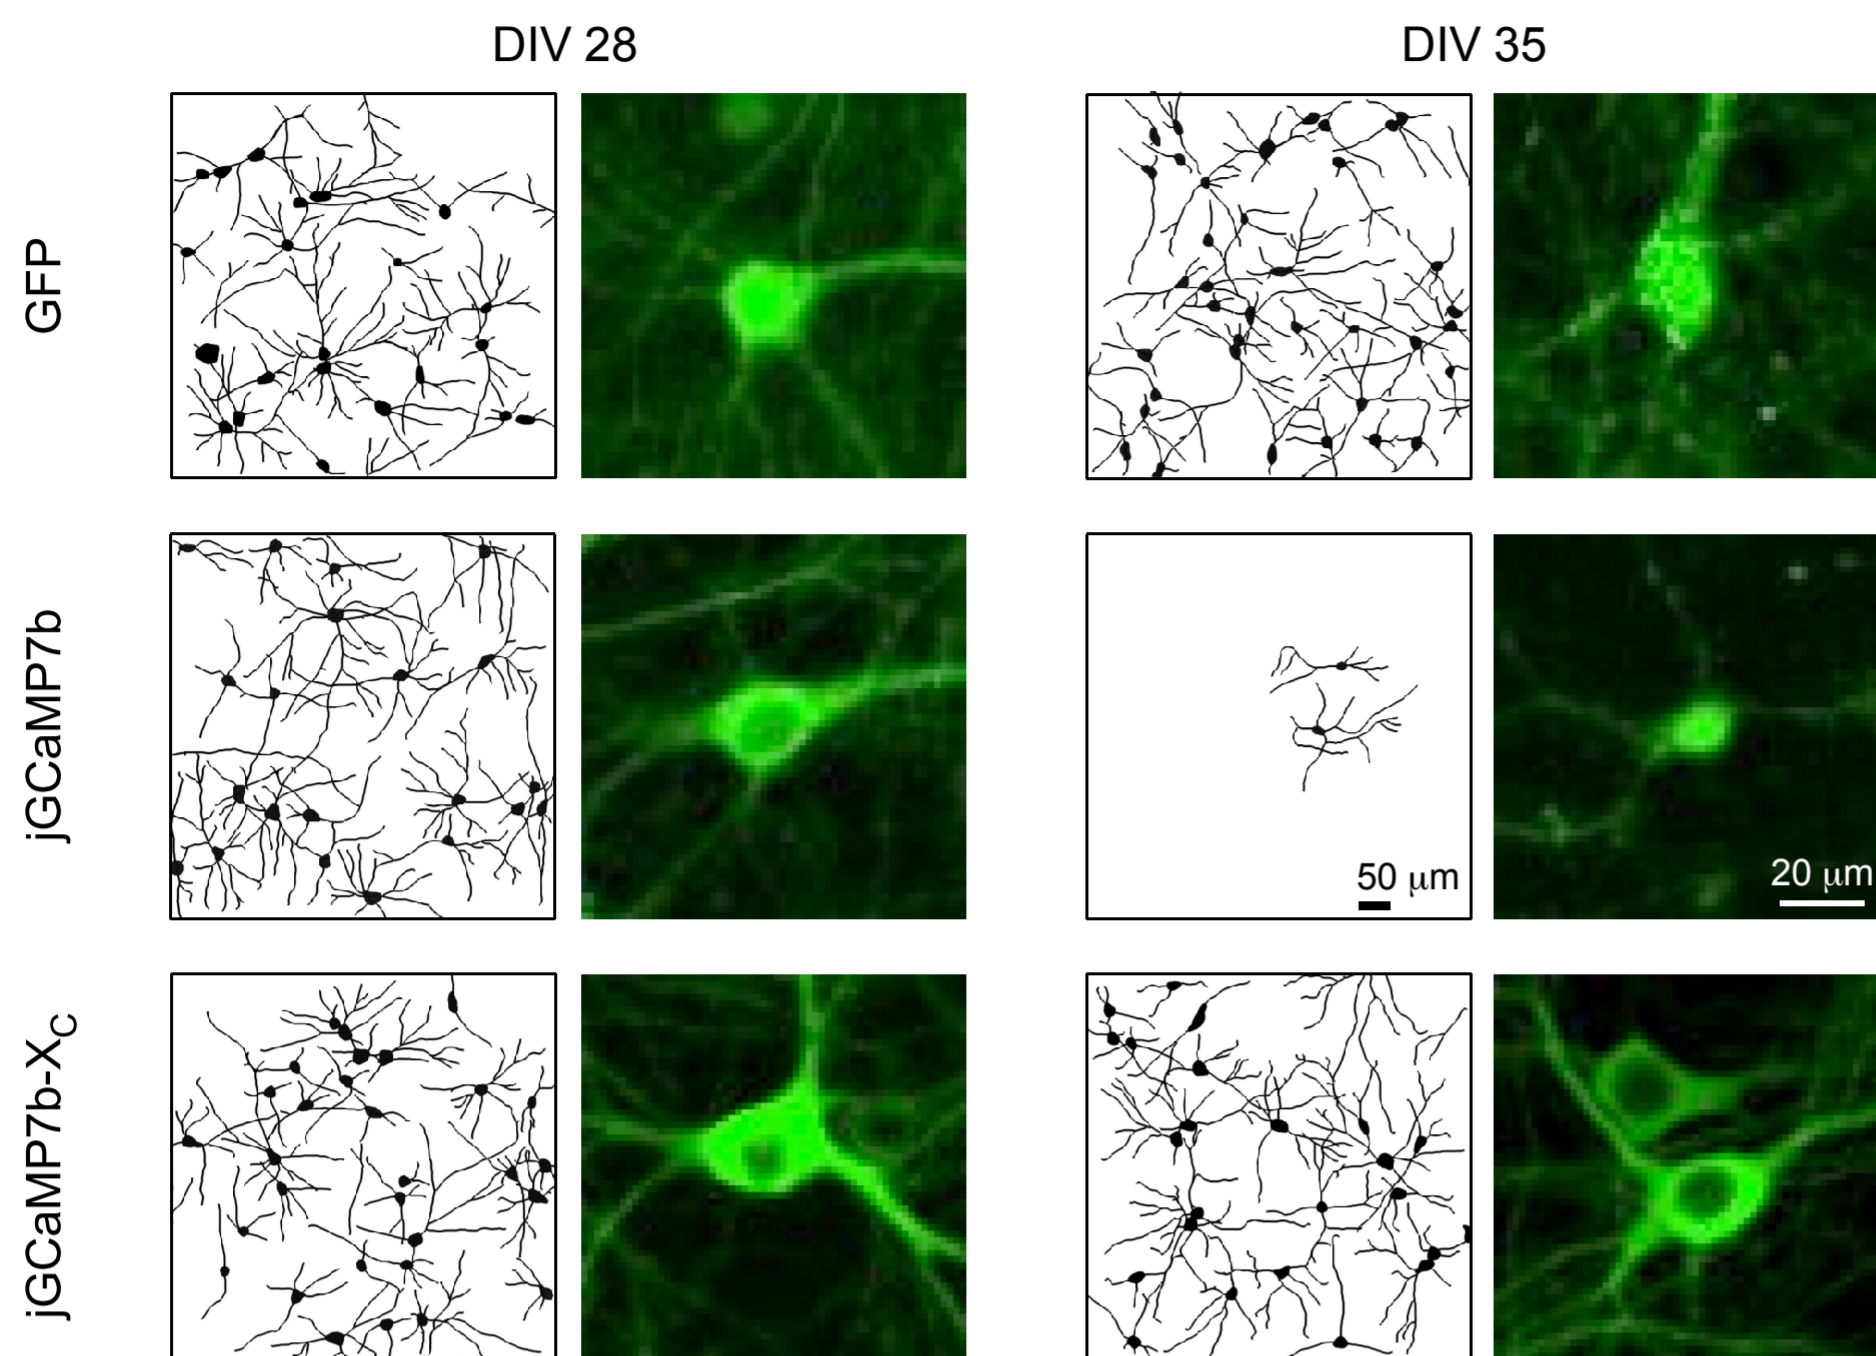**B**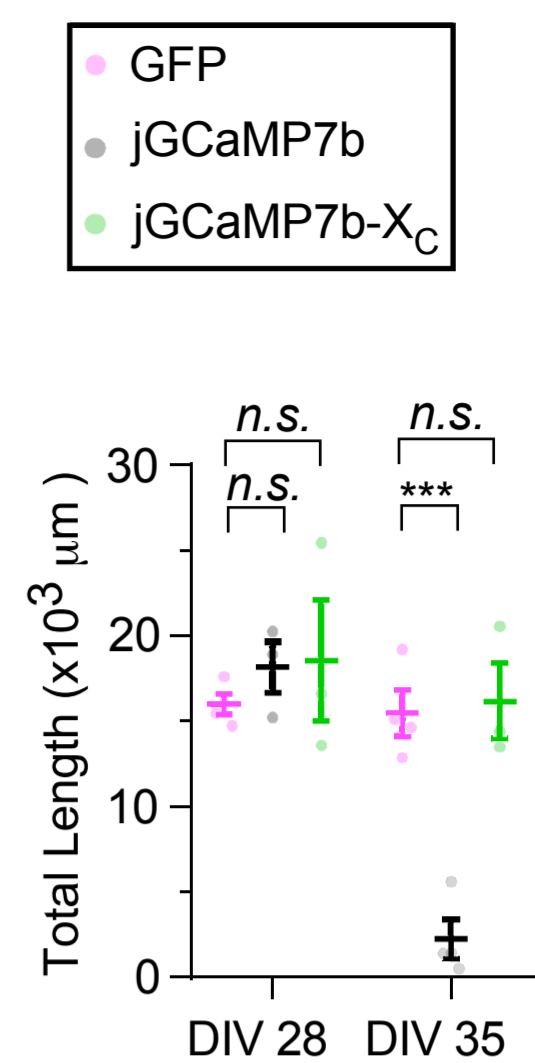**C**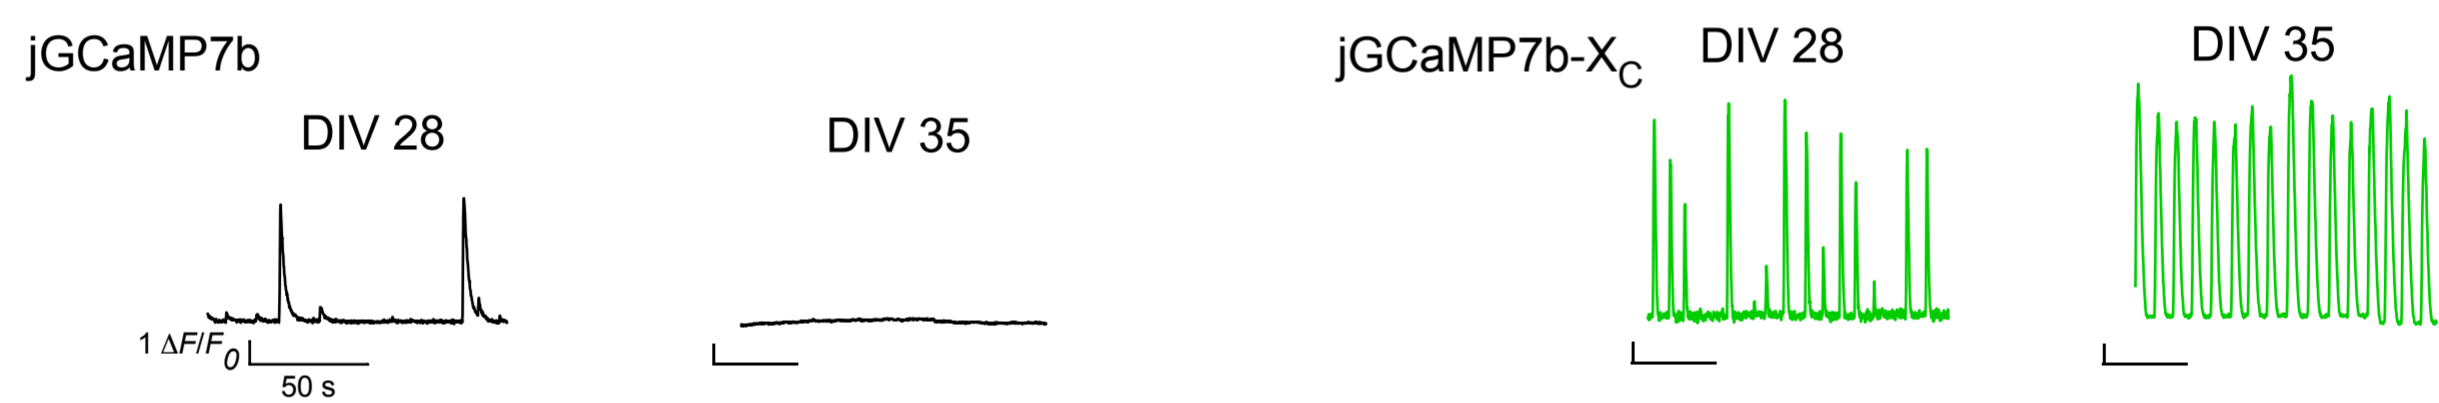**D**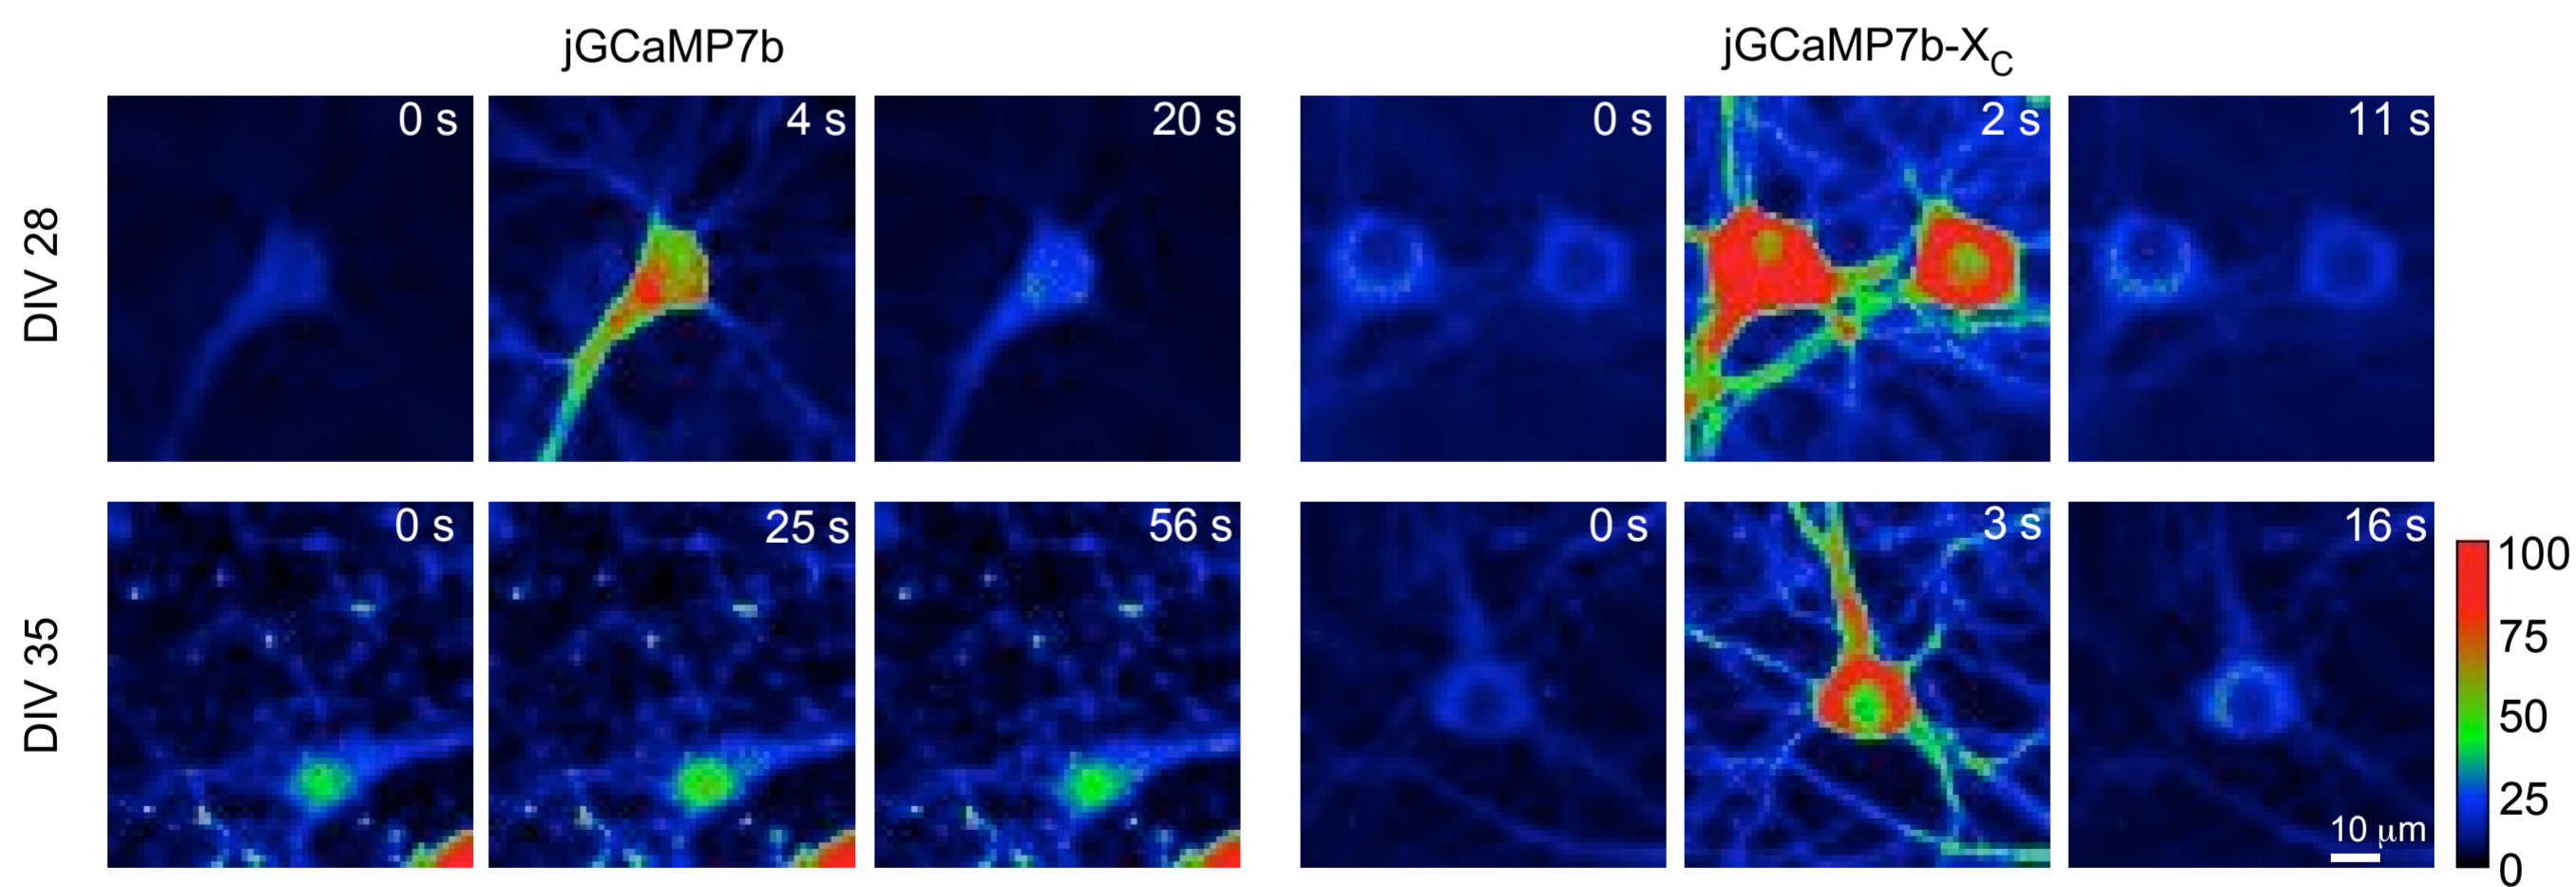**E**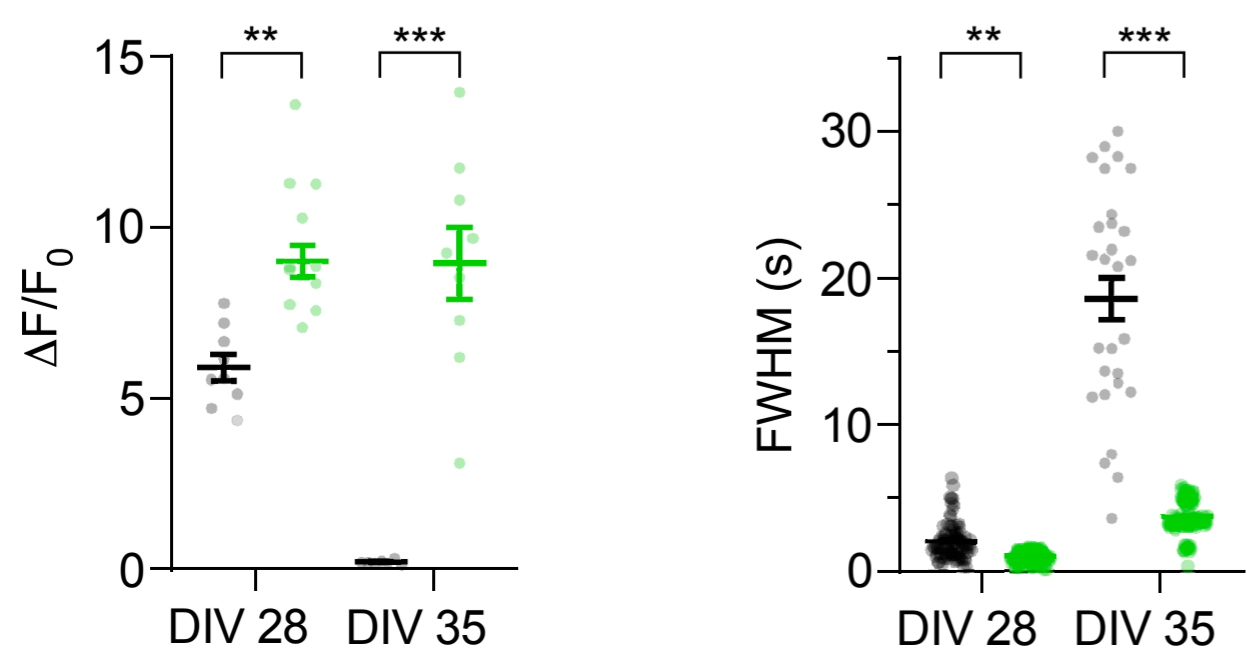

Supplement: supp [file elife-76691-supp-v1.zip]

**A**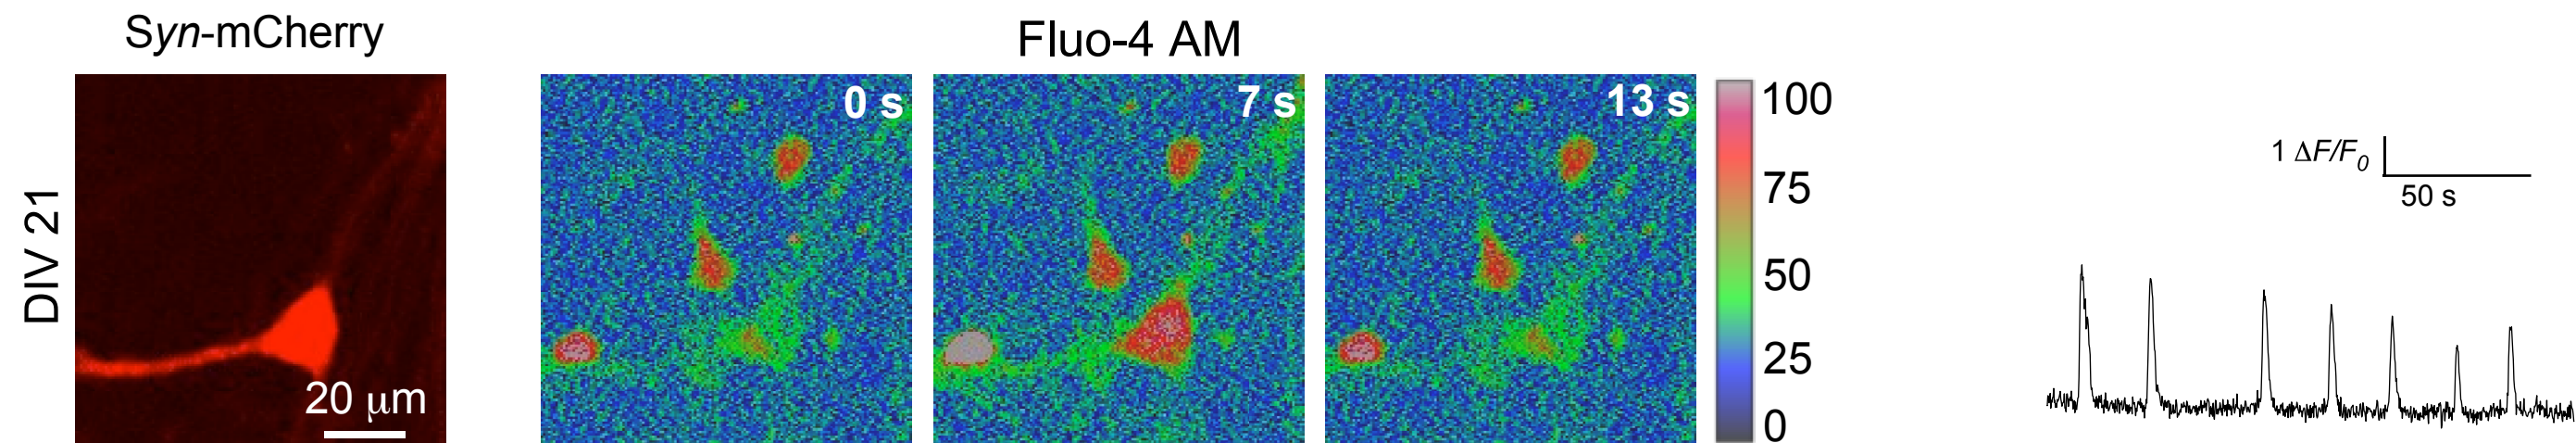**B**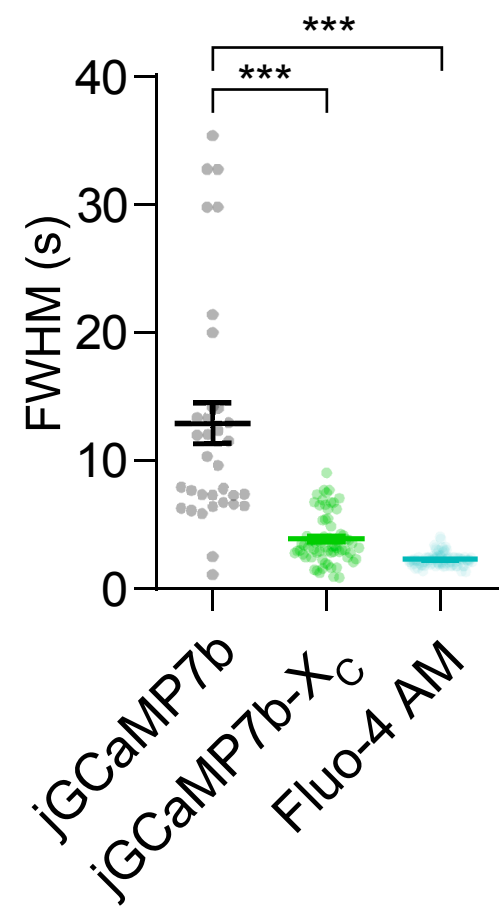**C**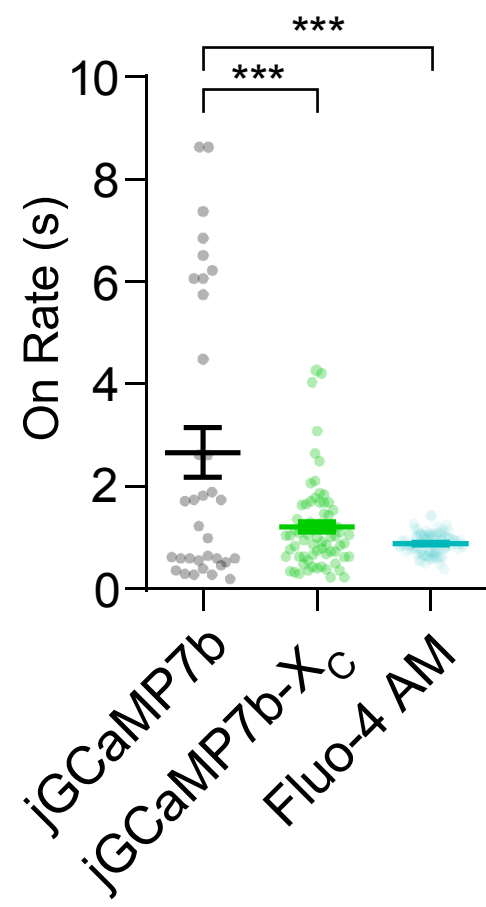**D**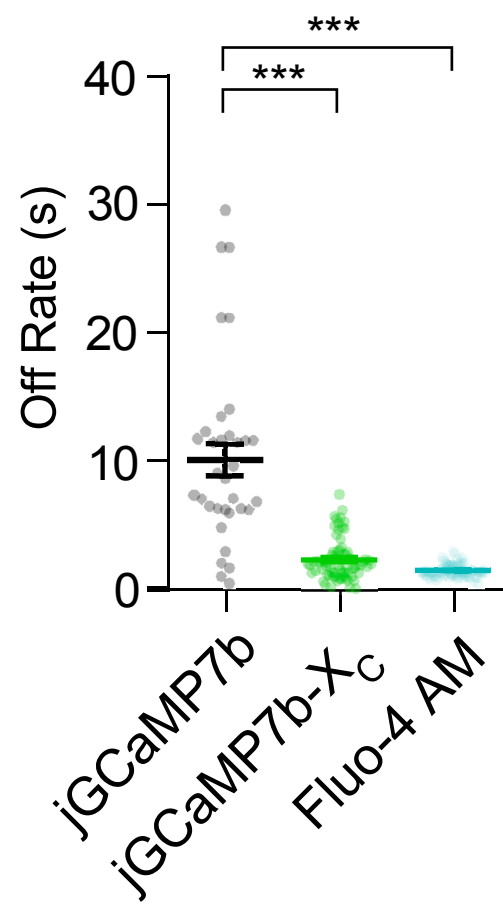**E**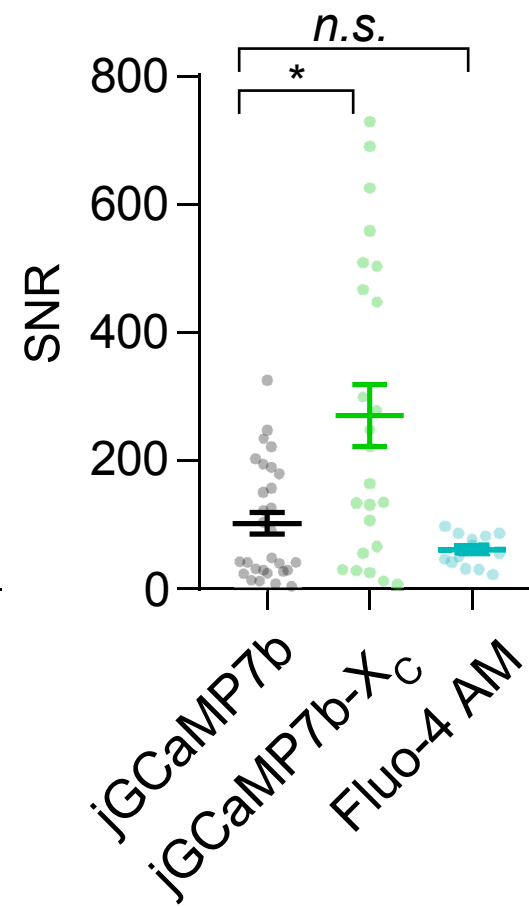**F**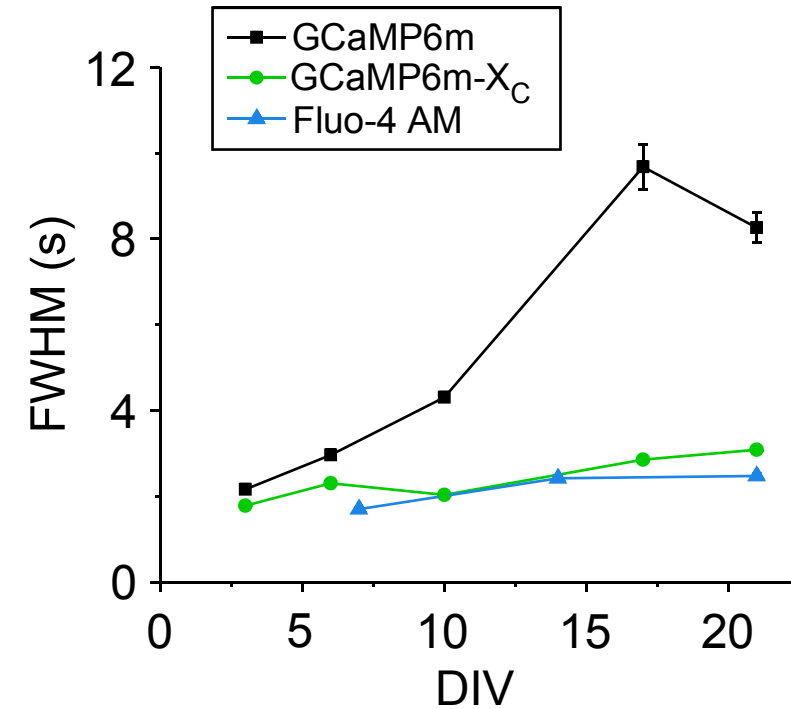

Supplement: supp [file elife-76691-supp-v1.zip]

**A**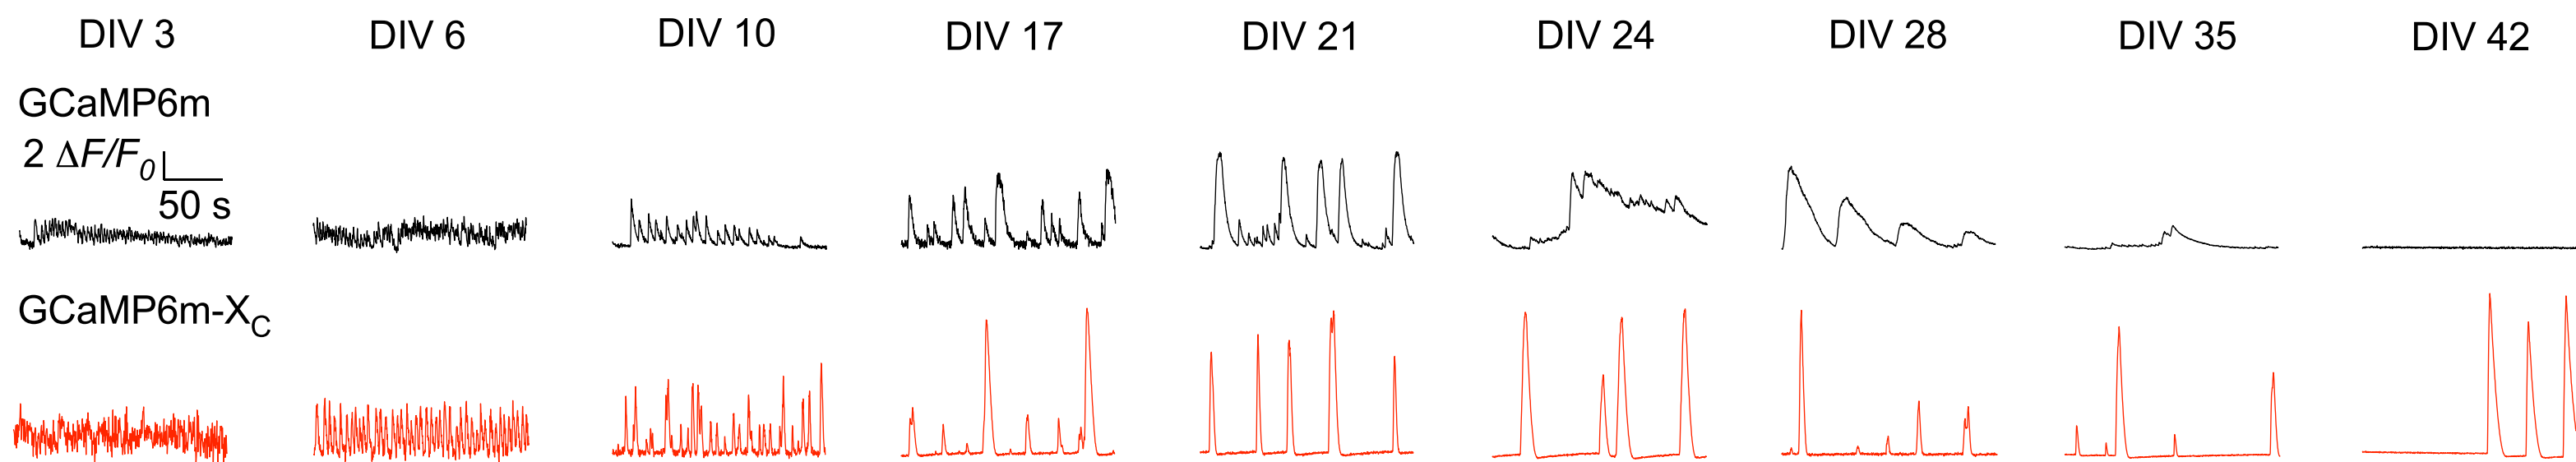**B**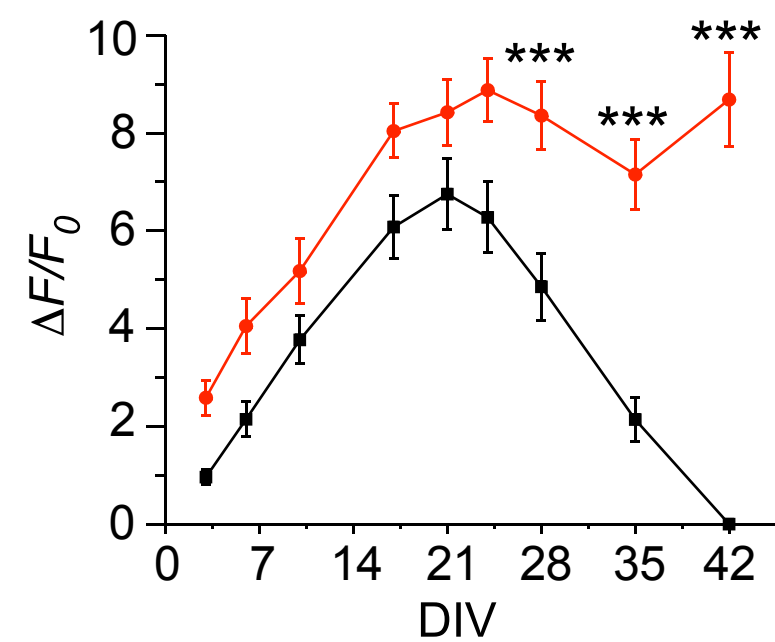**C**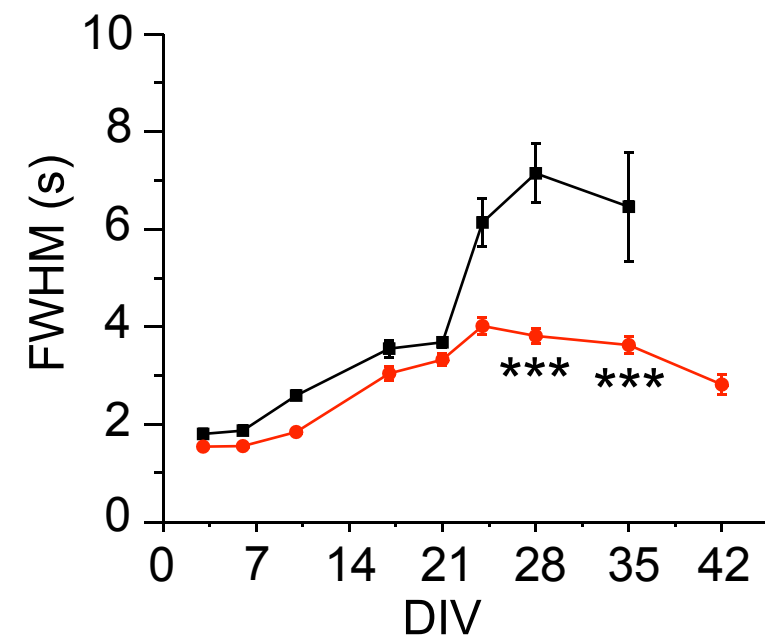**D**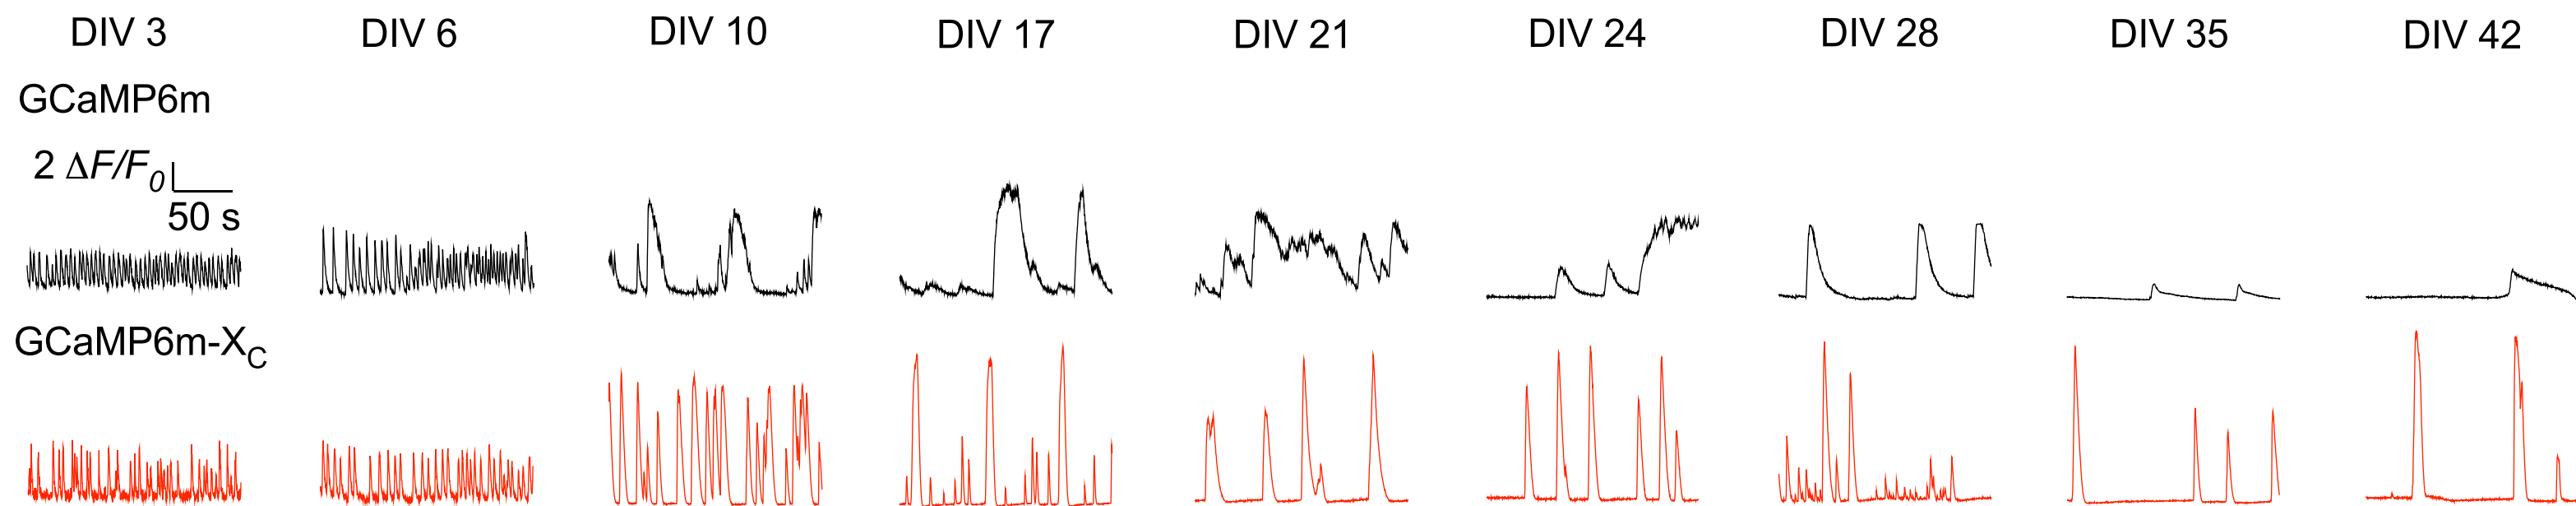**E**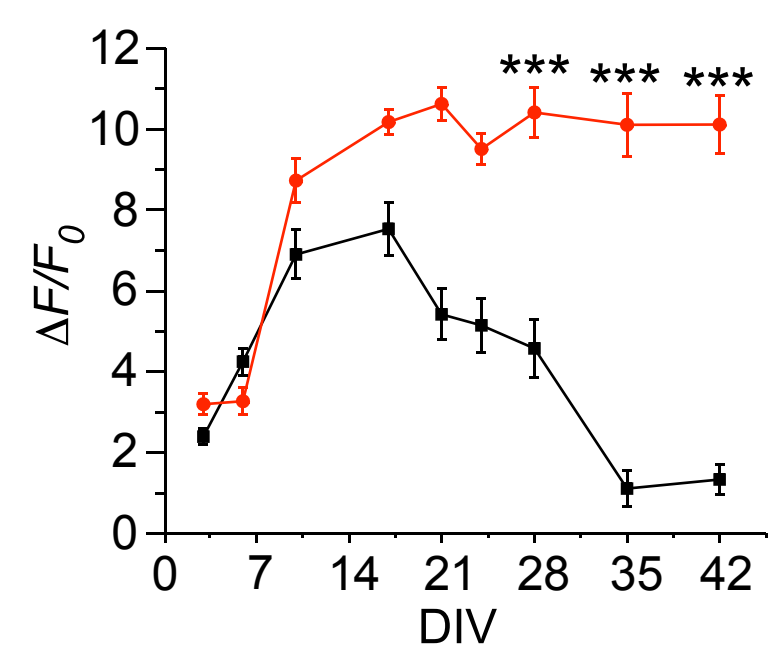**F**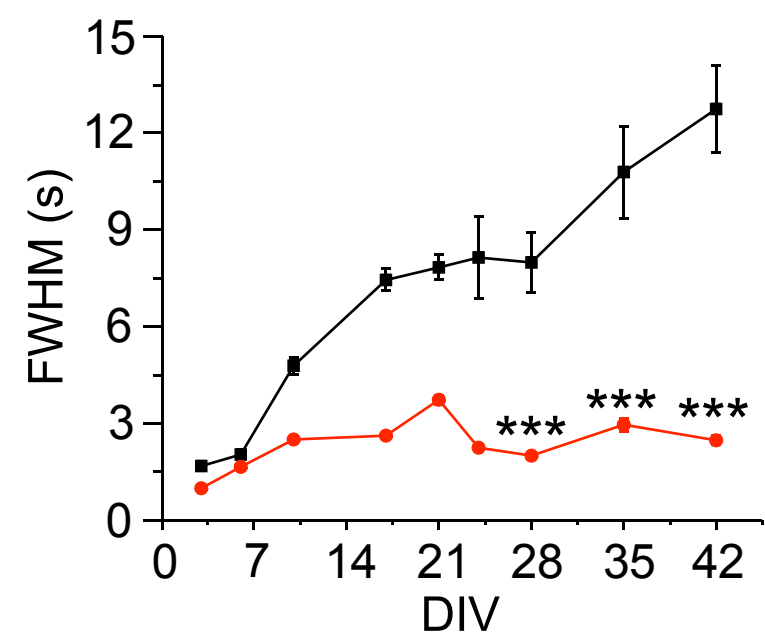

Supplement: supp [file elife-76691-supp-v1.zip]

**A**

Emx1-Cre;Ai148

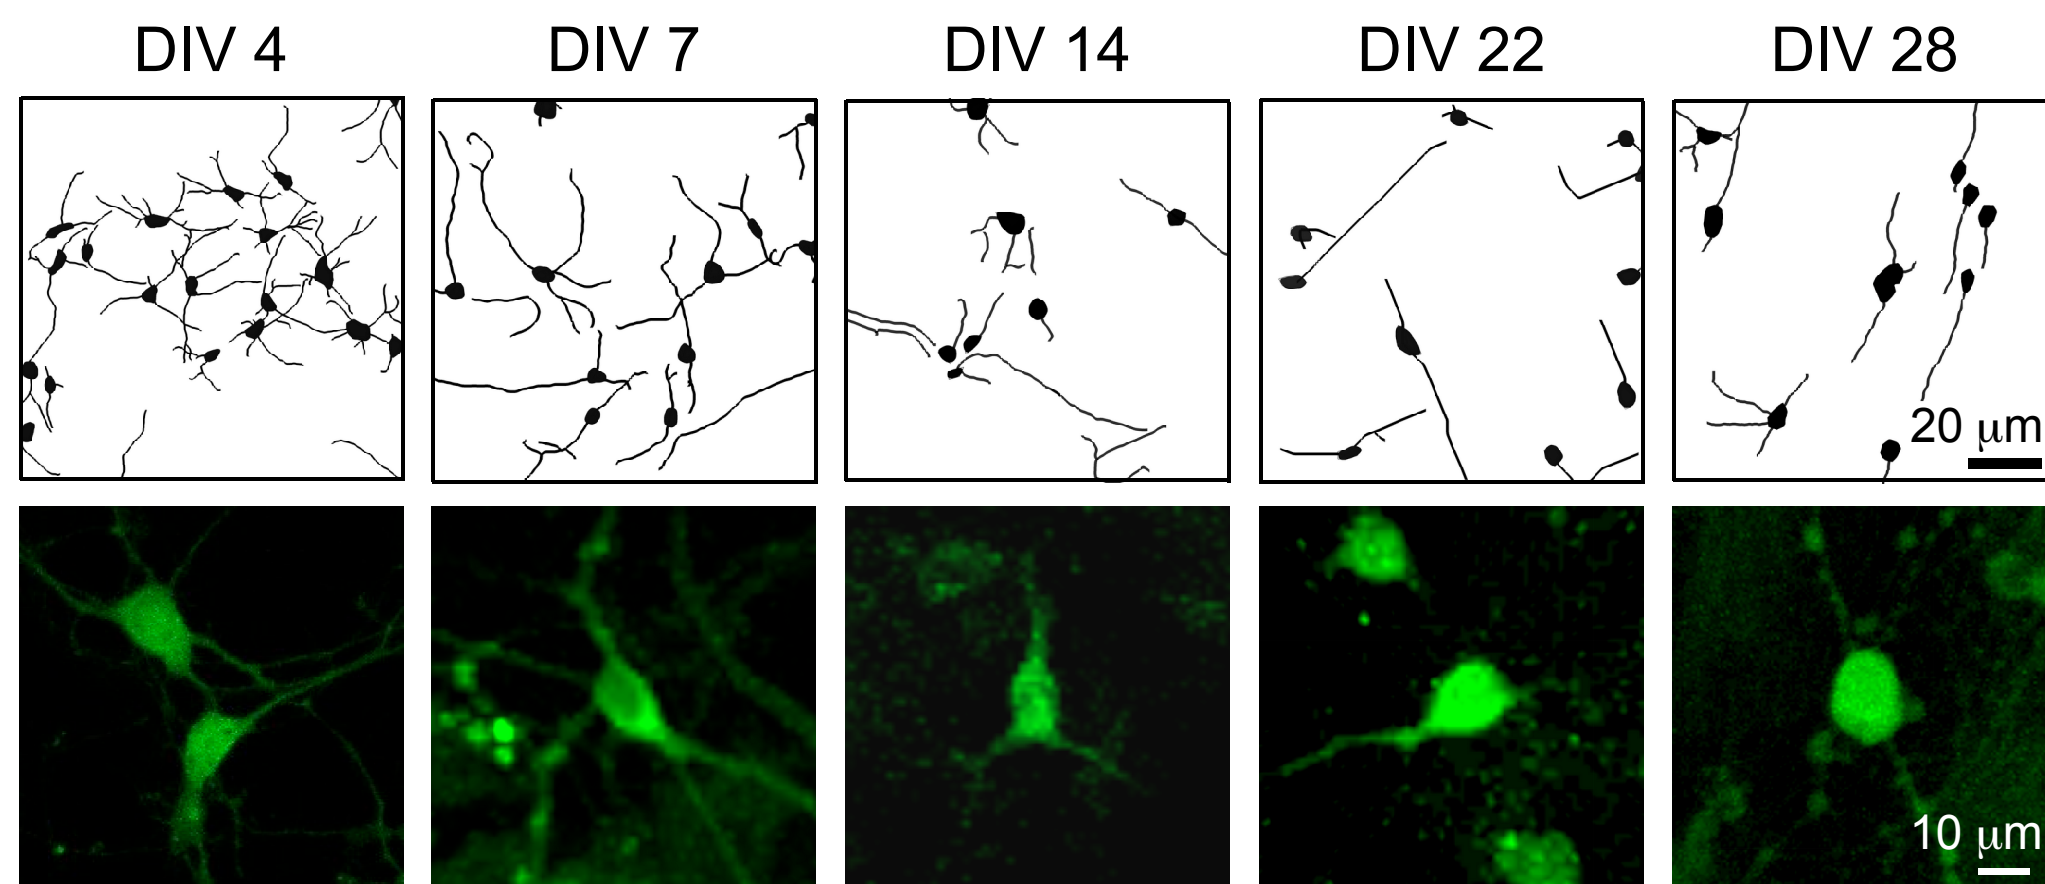**B**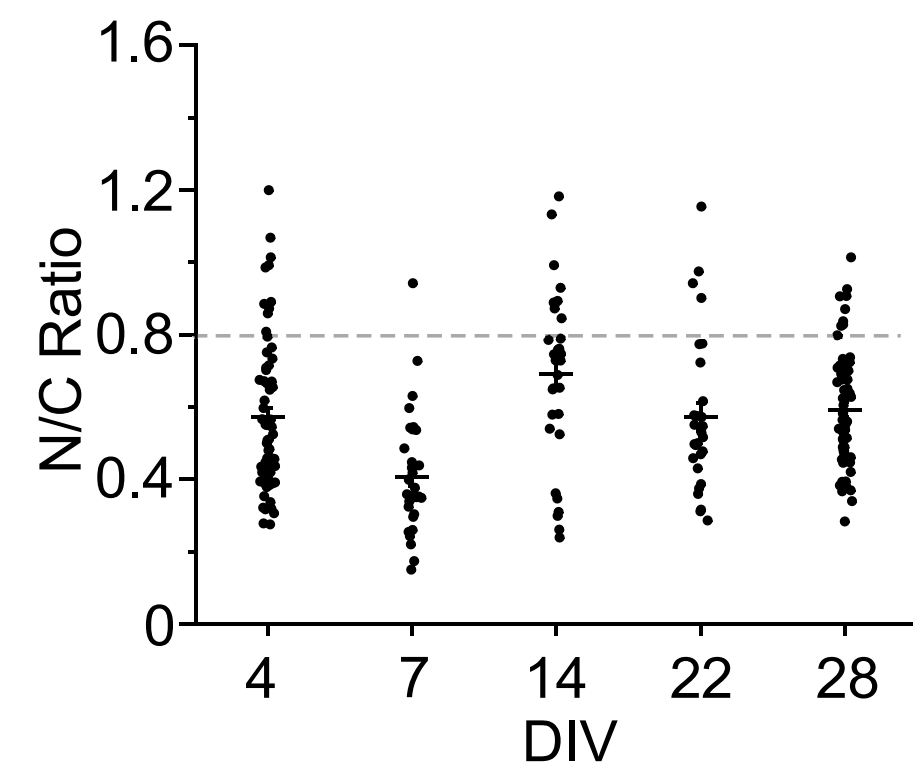**C**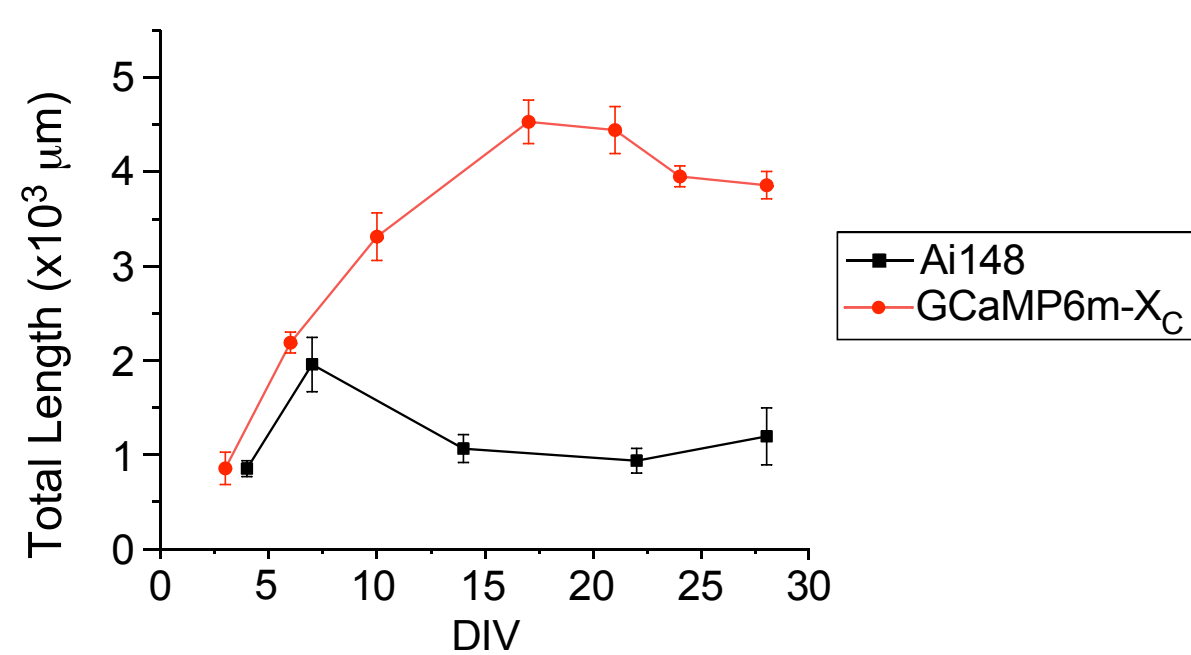**D**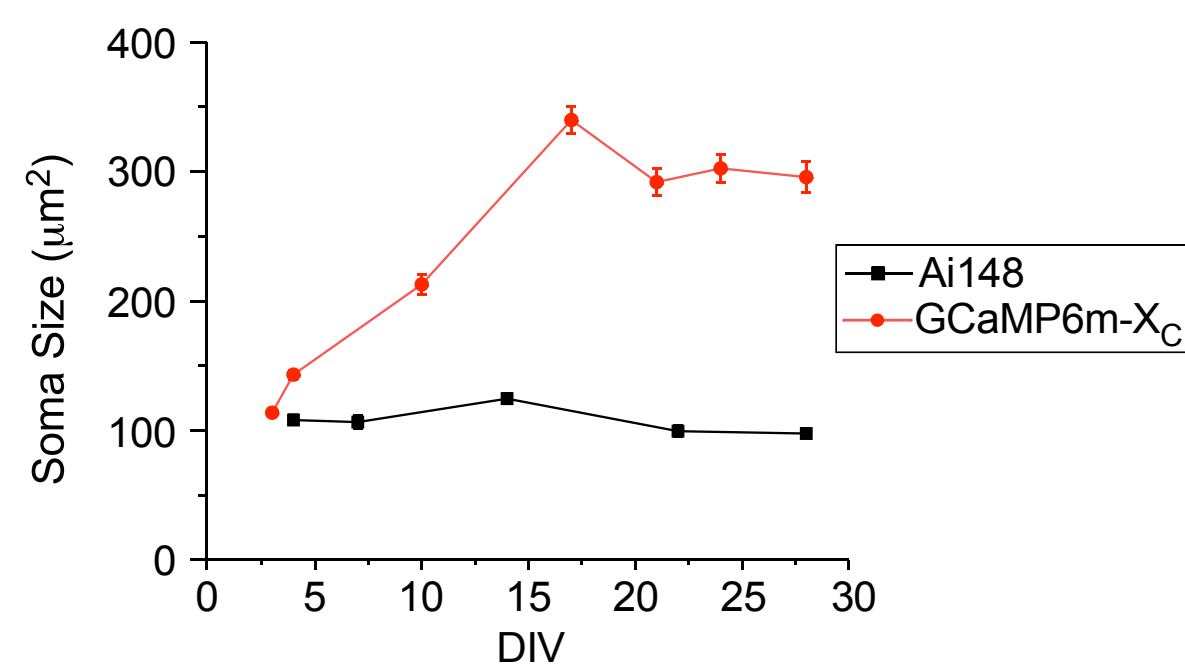**E**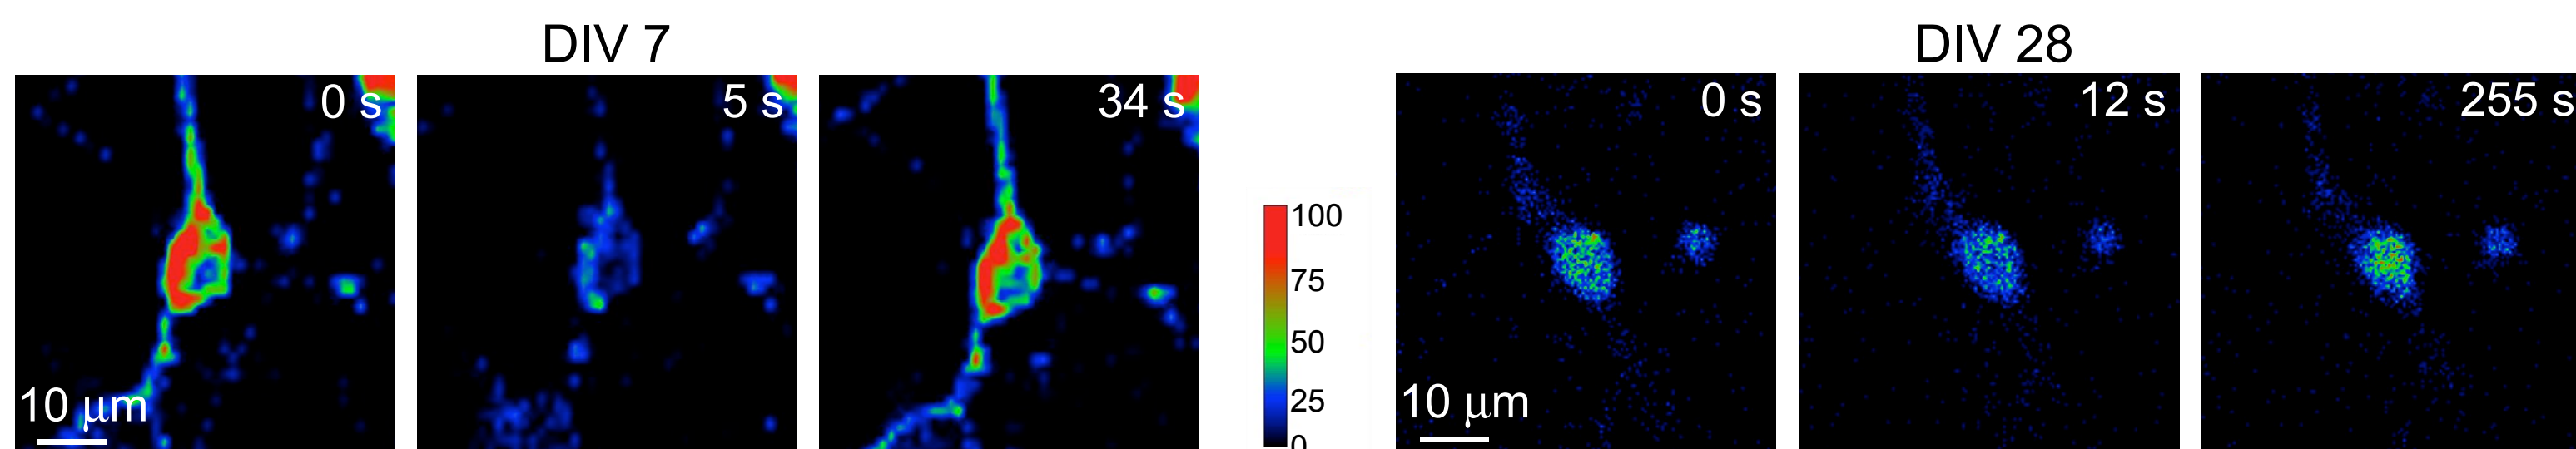**F**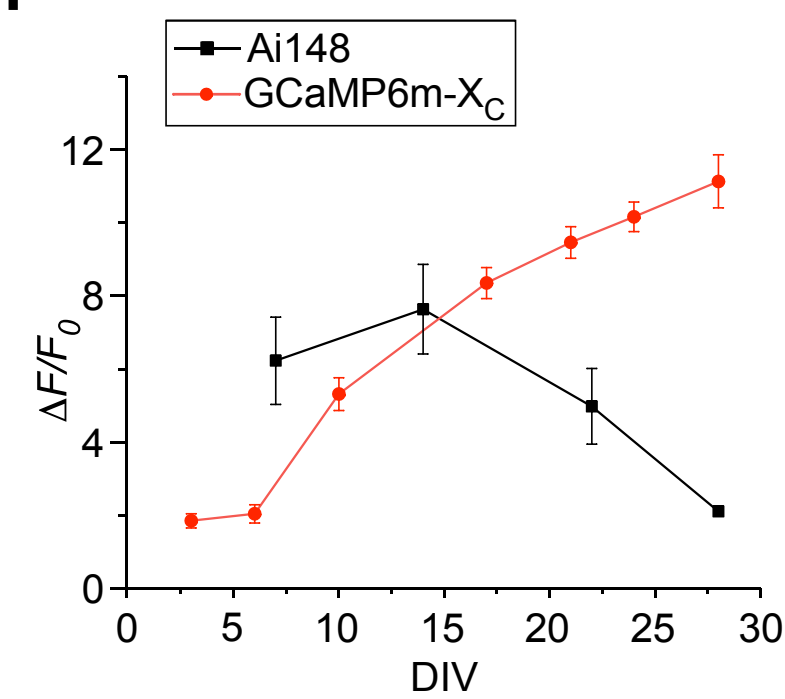**G**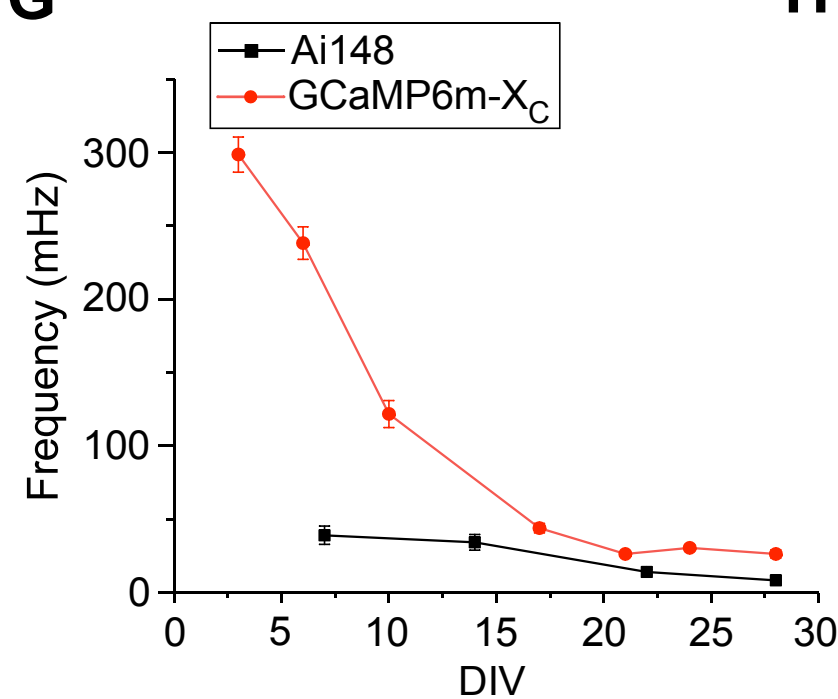**H**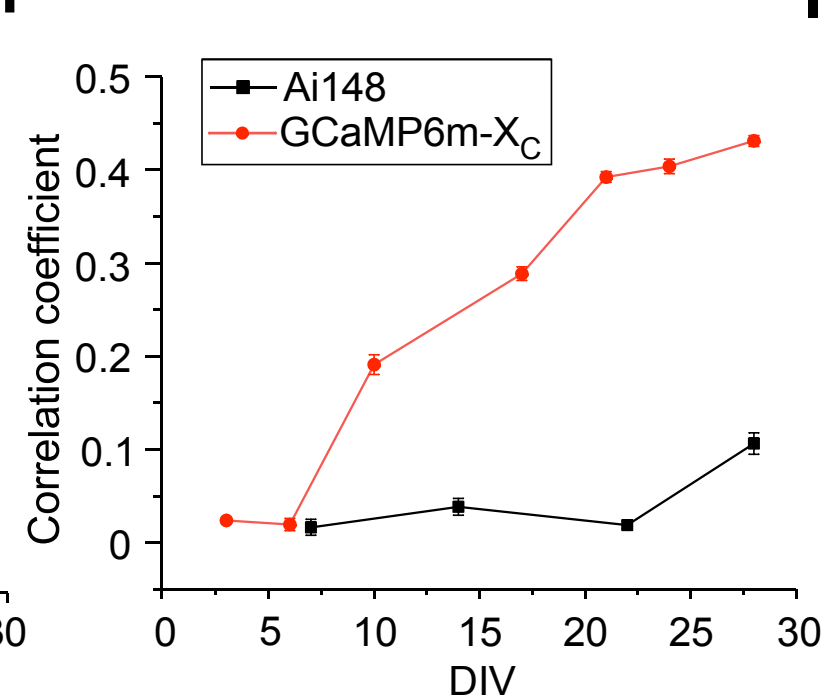**I**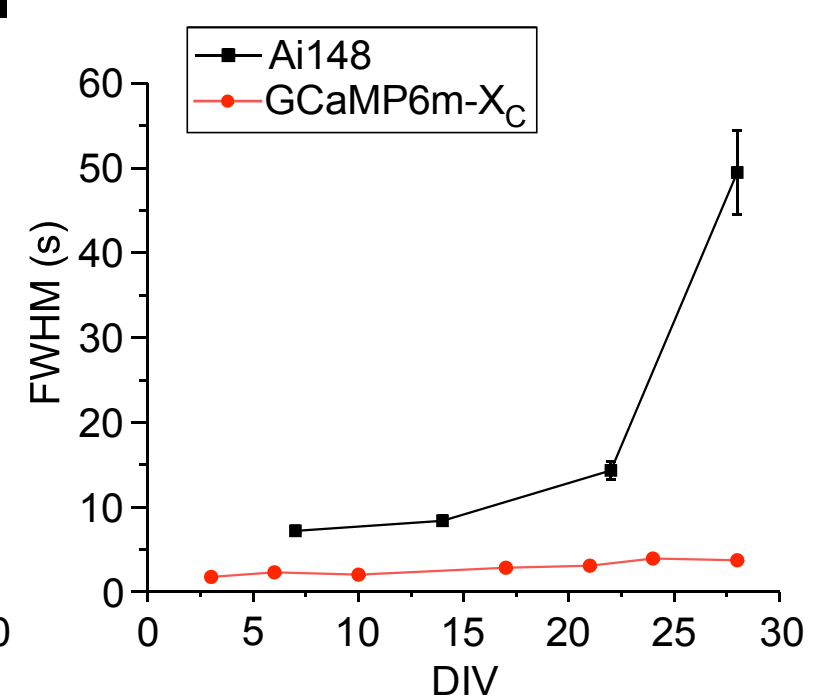

Supplement: supp [file elife-76691-supp-v1.zip]

**A**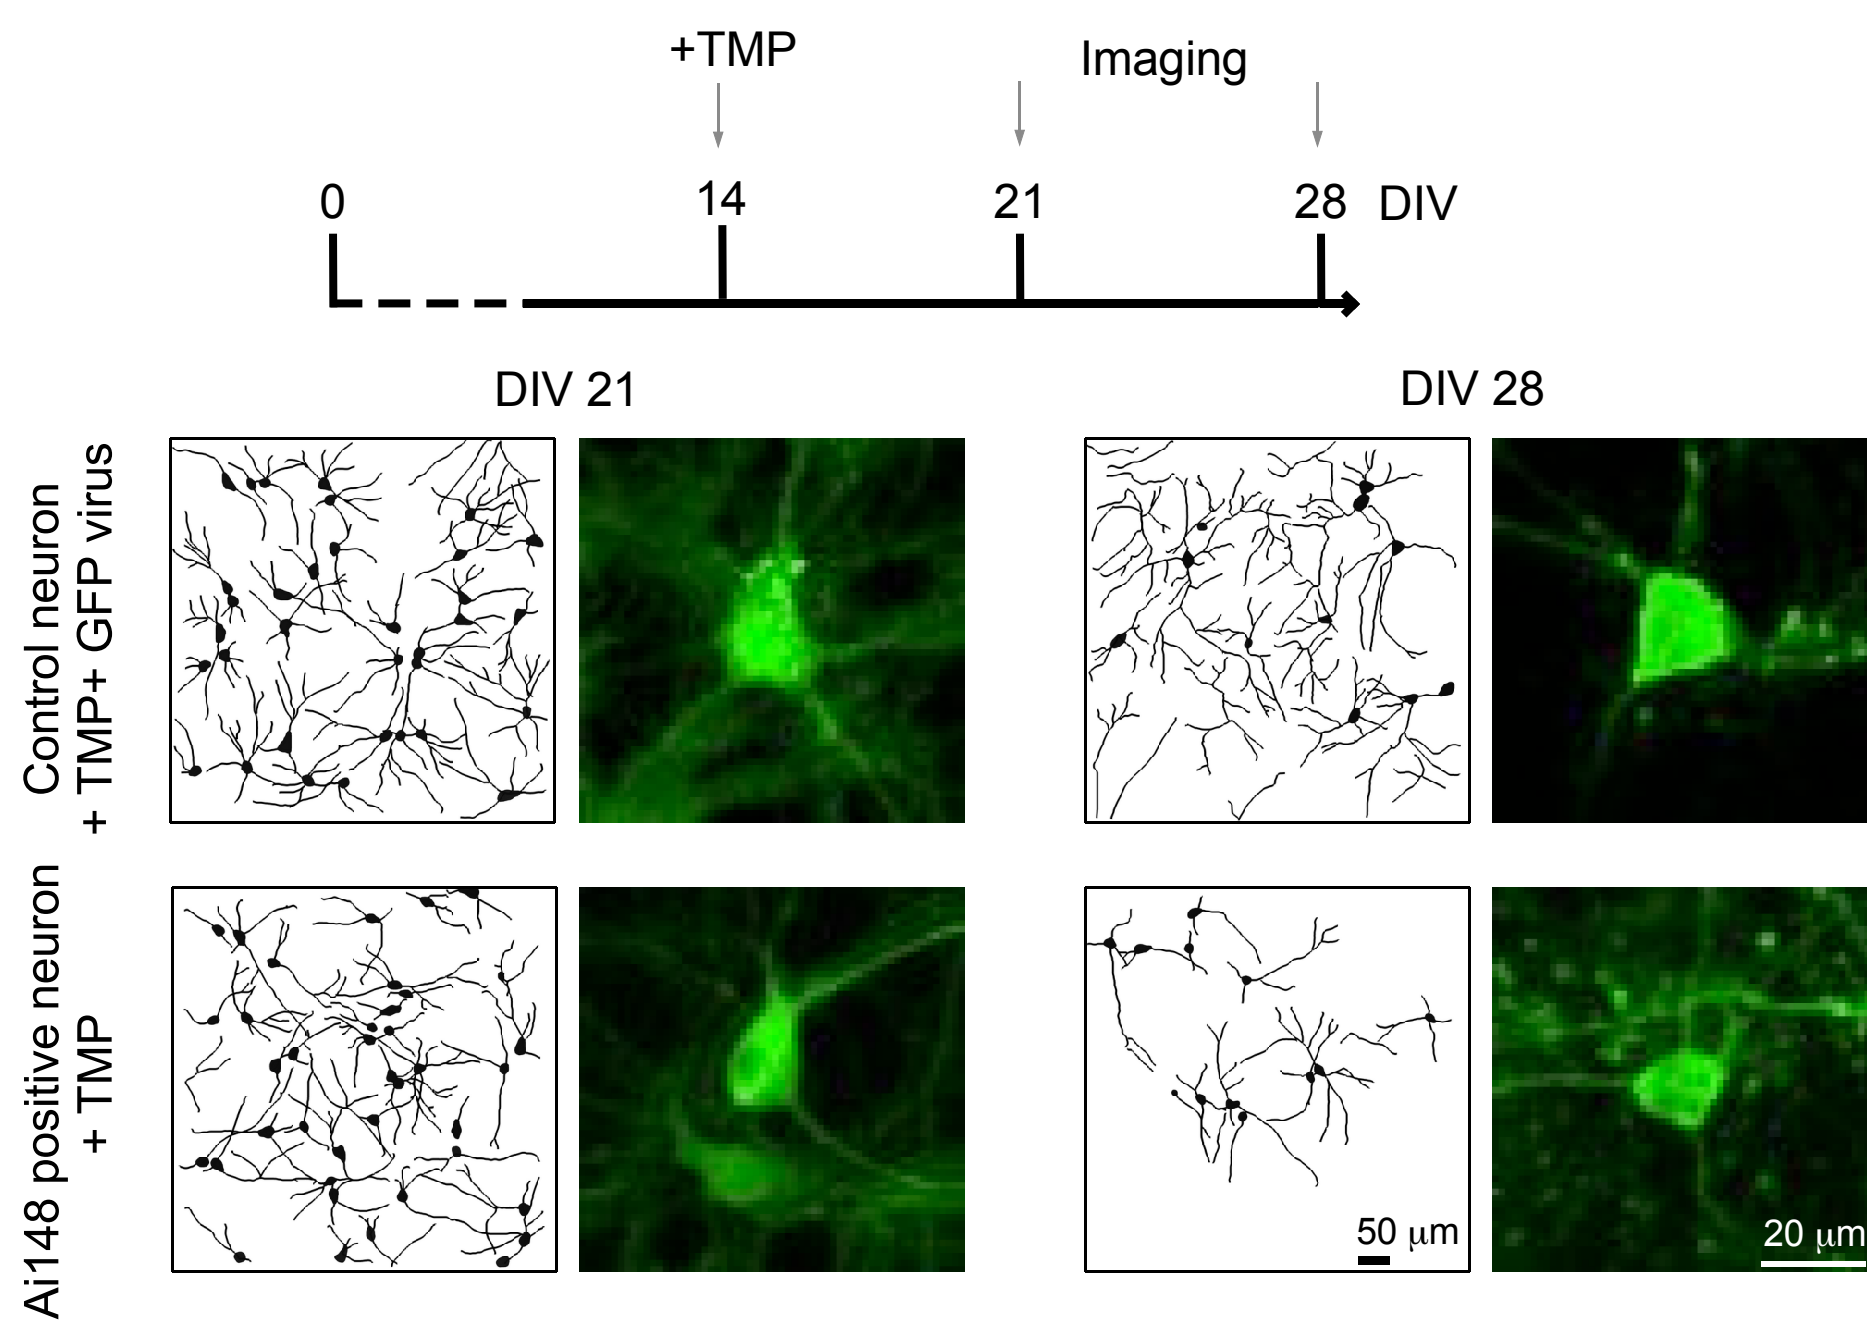**B**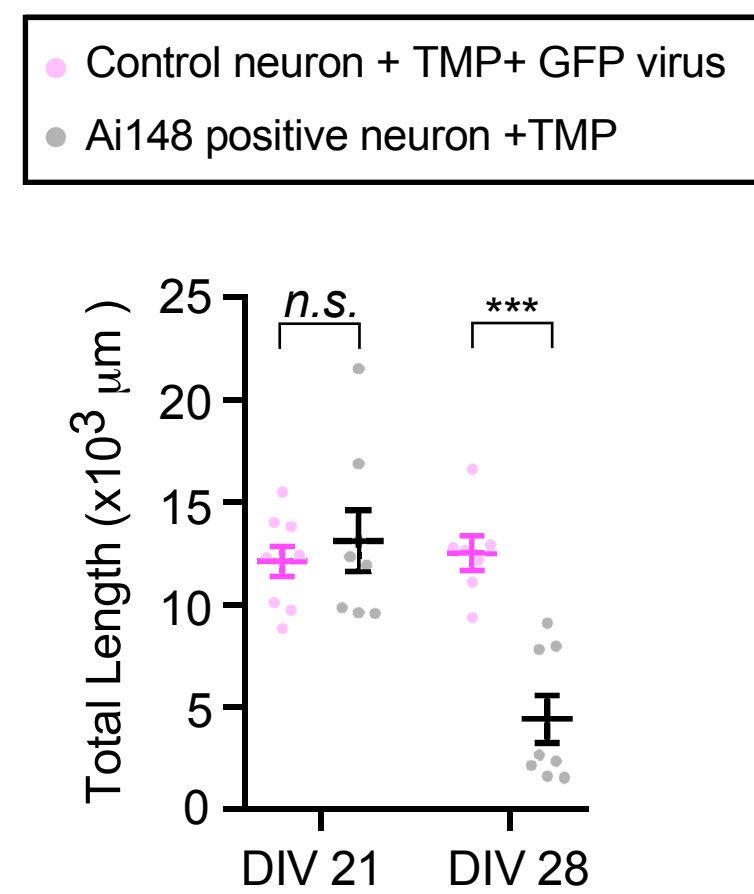**C**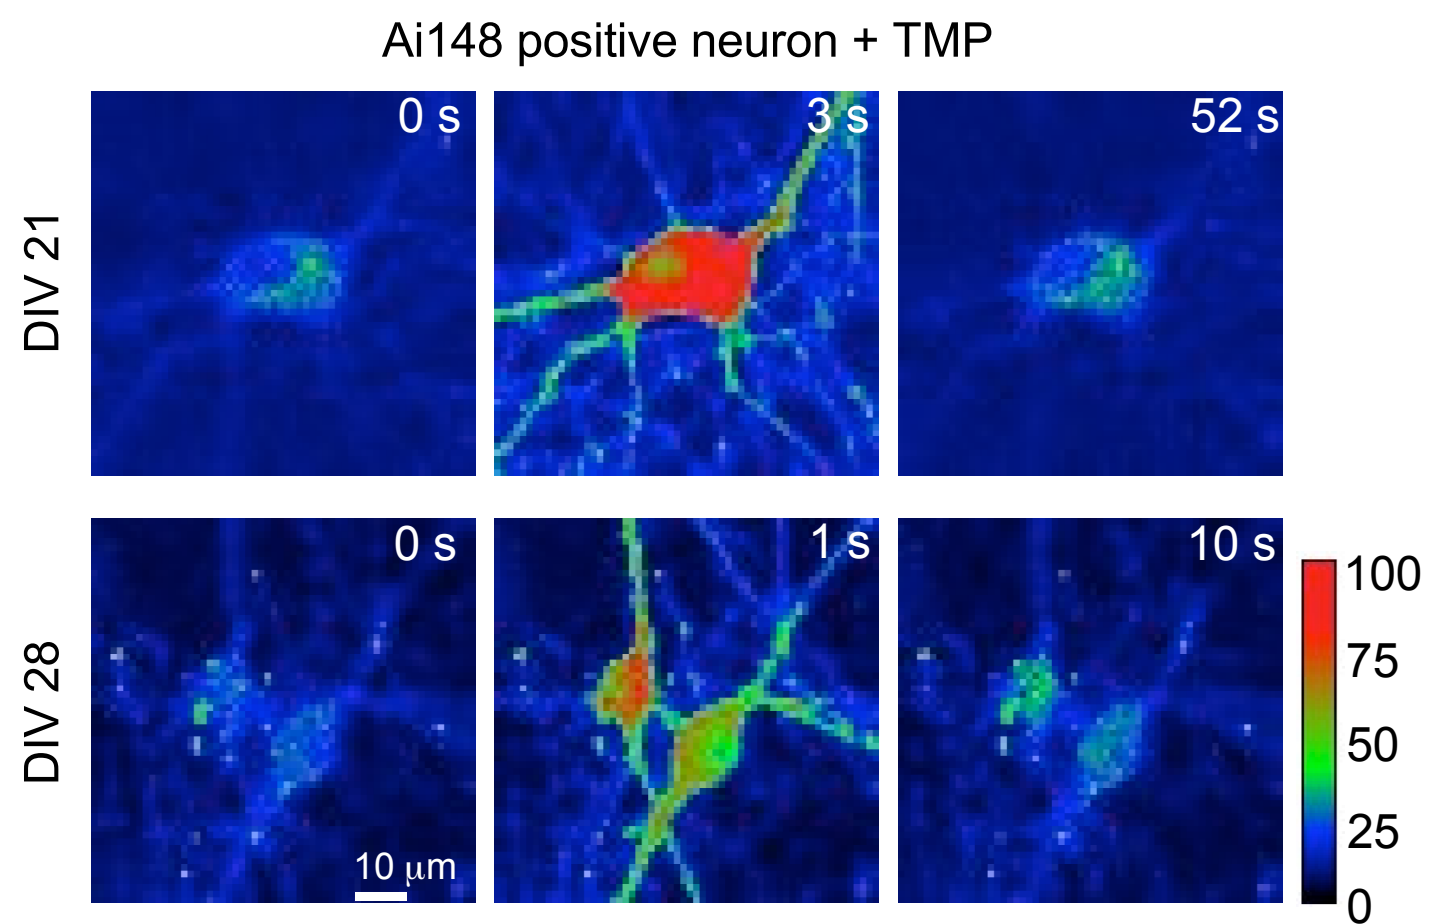**D**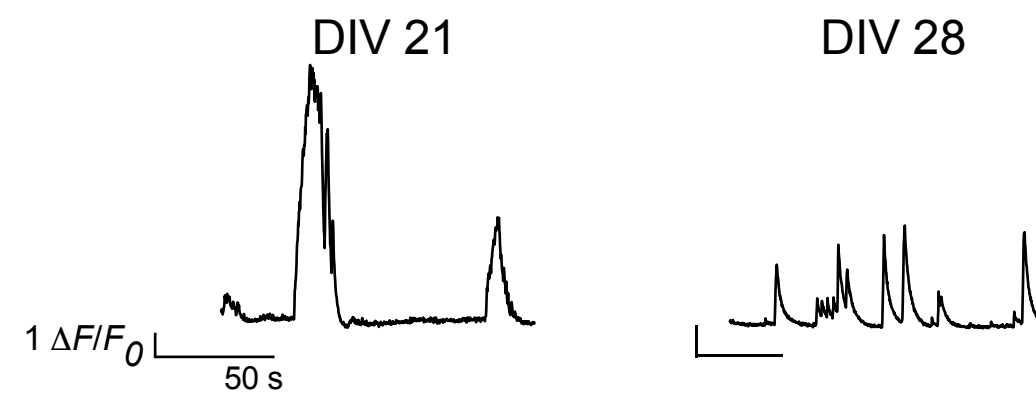**E**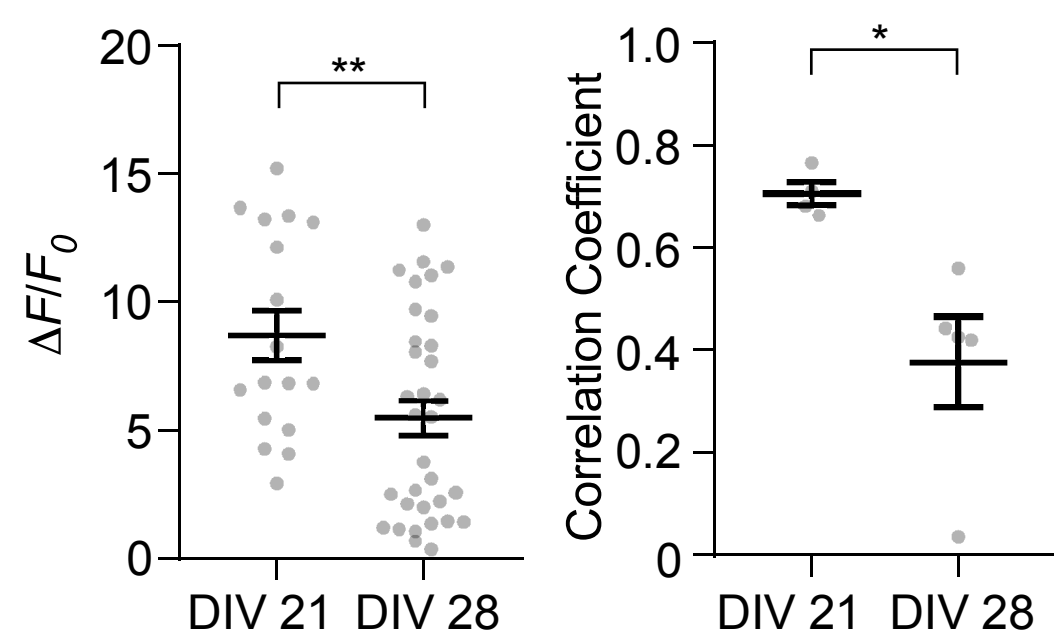

Supplement: supp [file elife-76691-supp-v1.zip]

**A**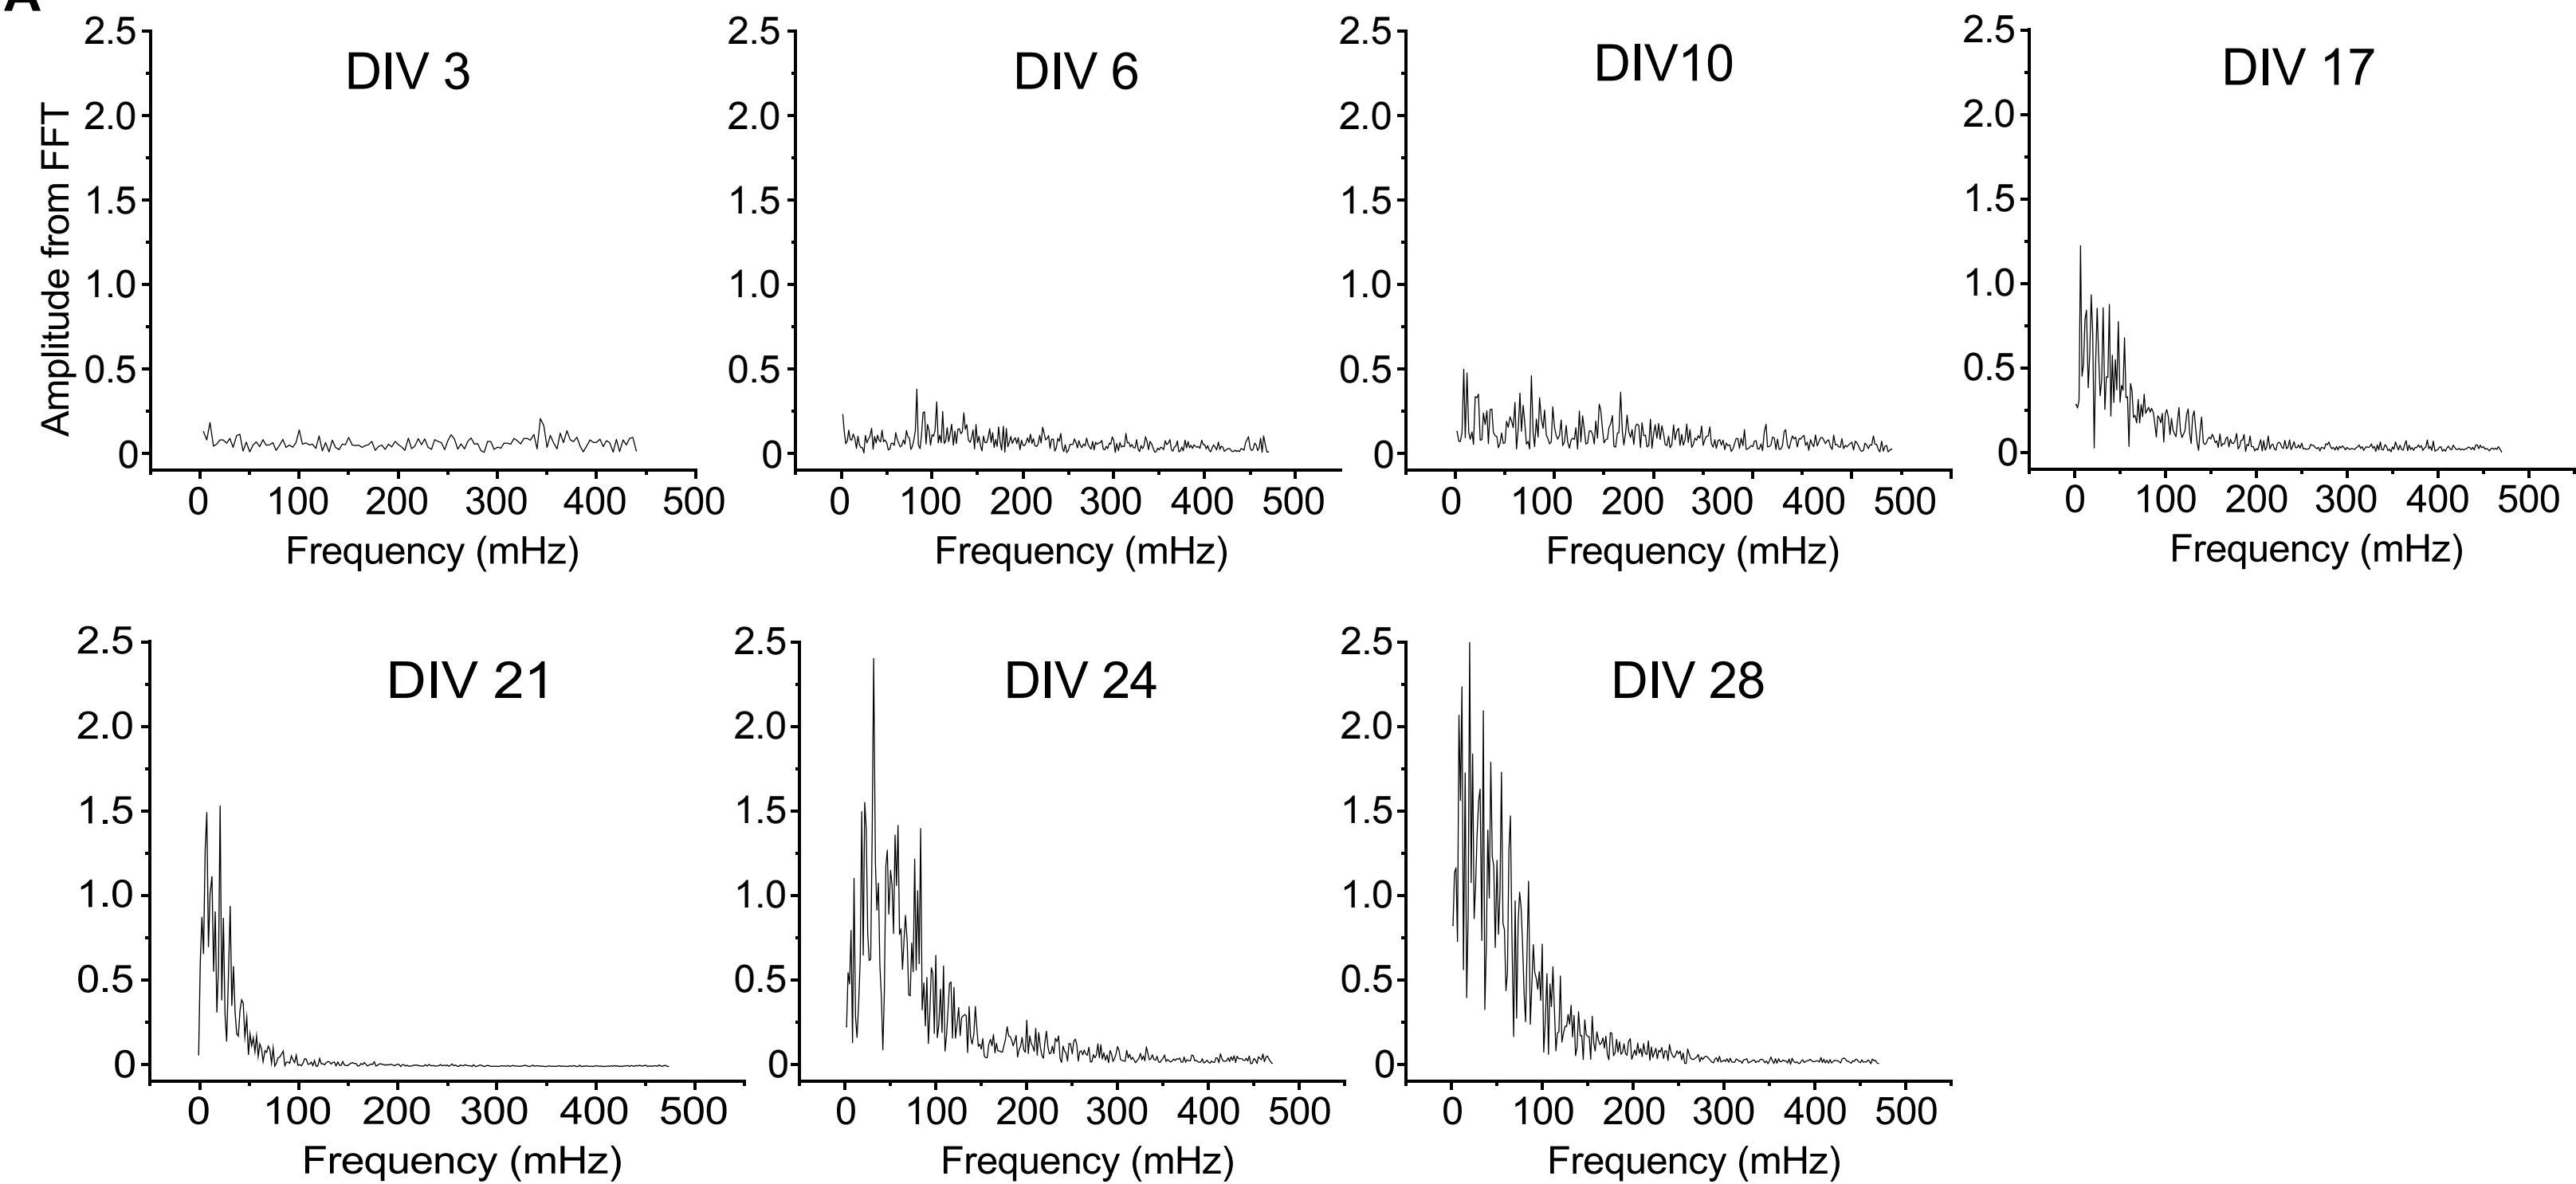**B**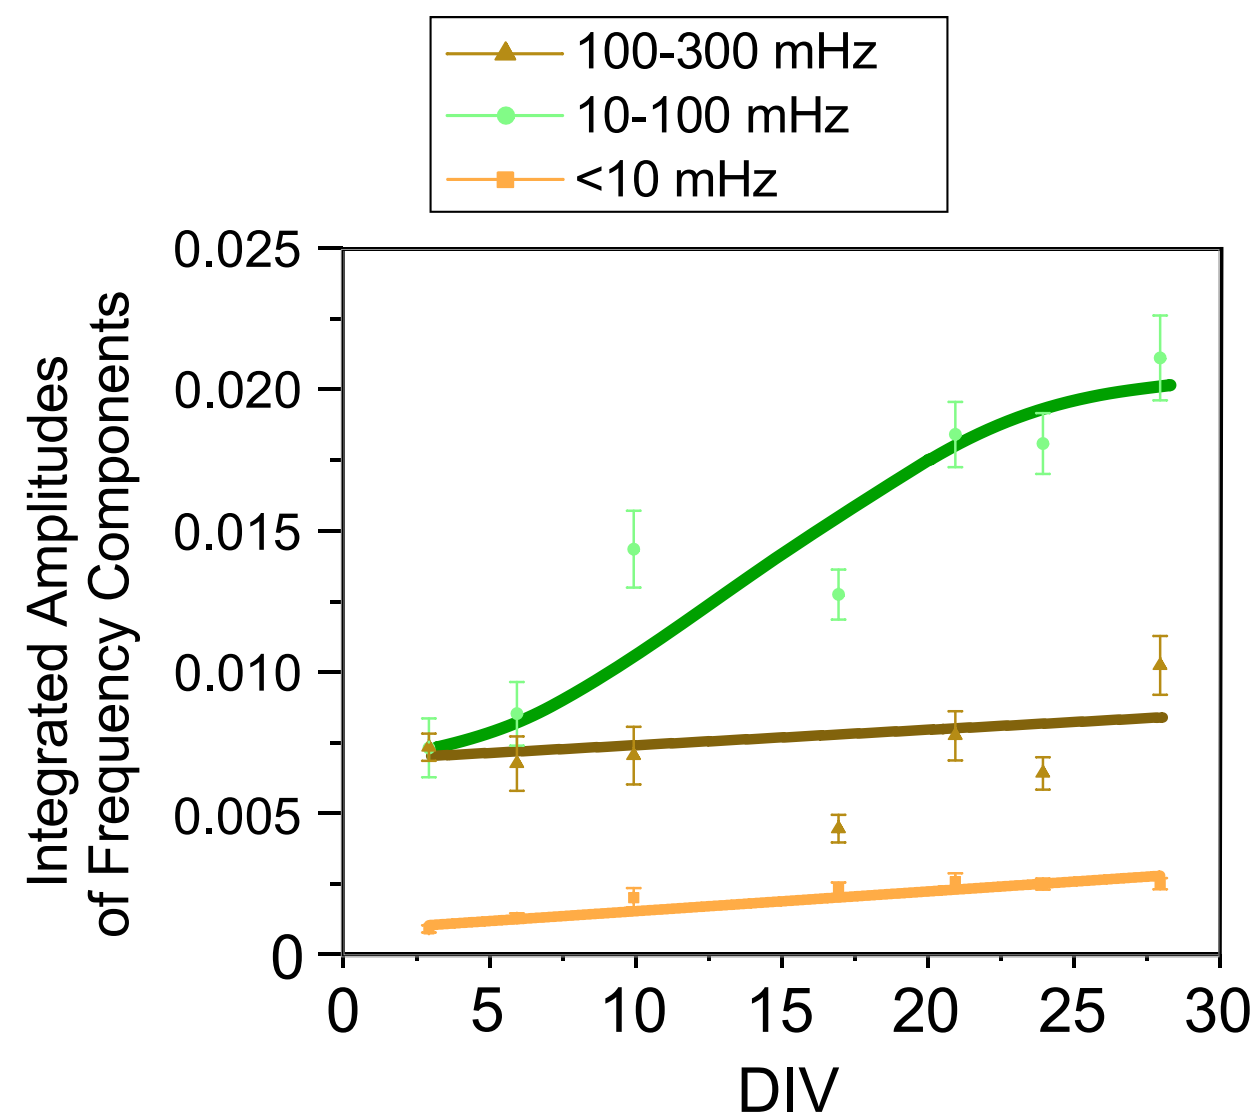

Supplement: supp [file elife-76691-supp-v1.zip]

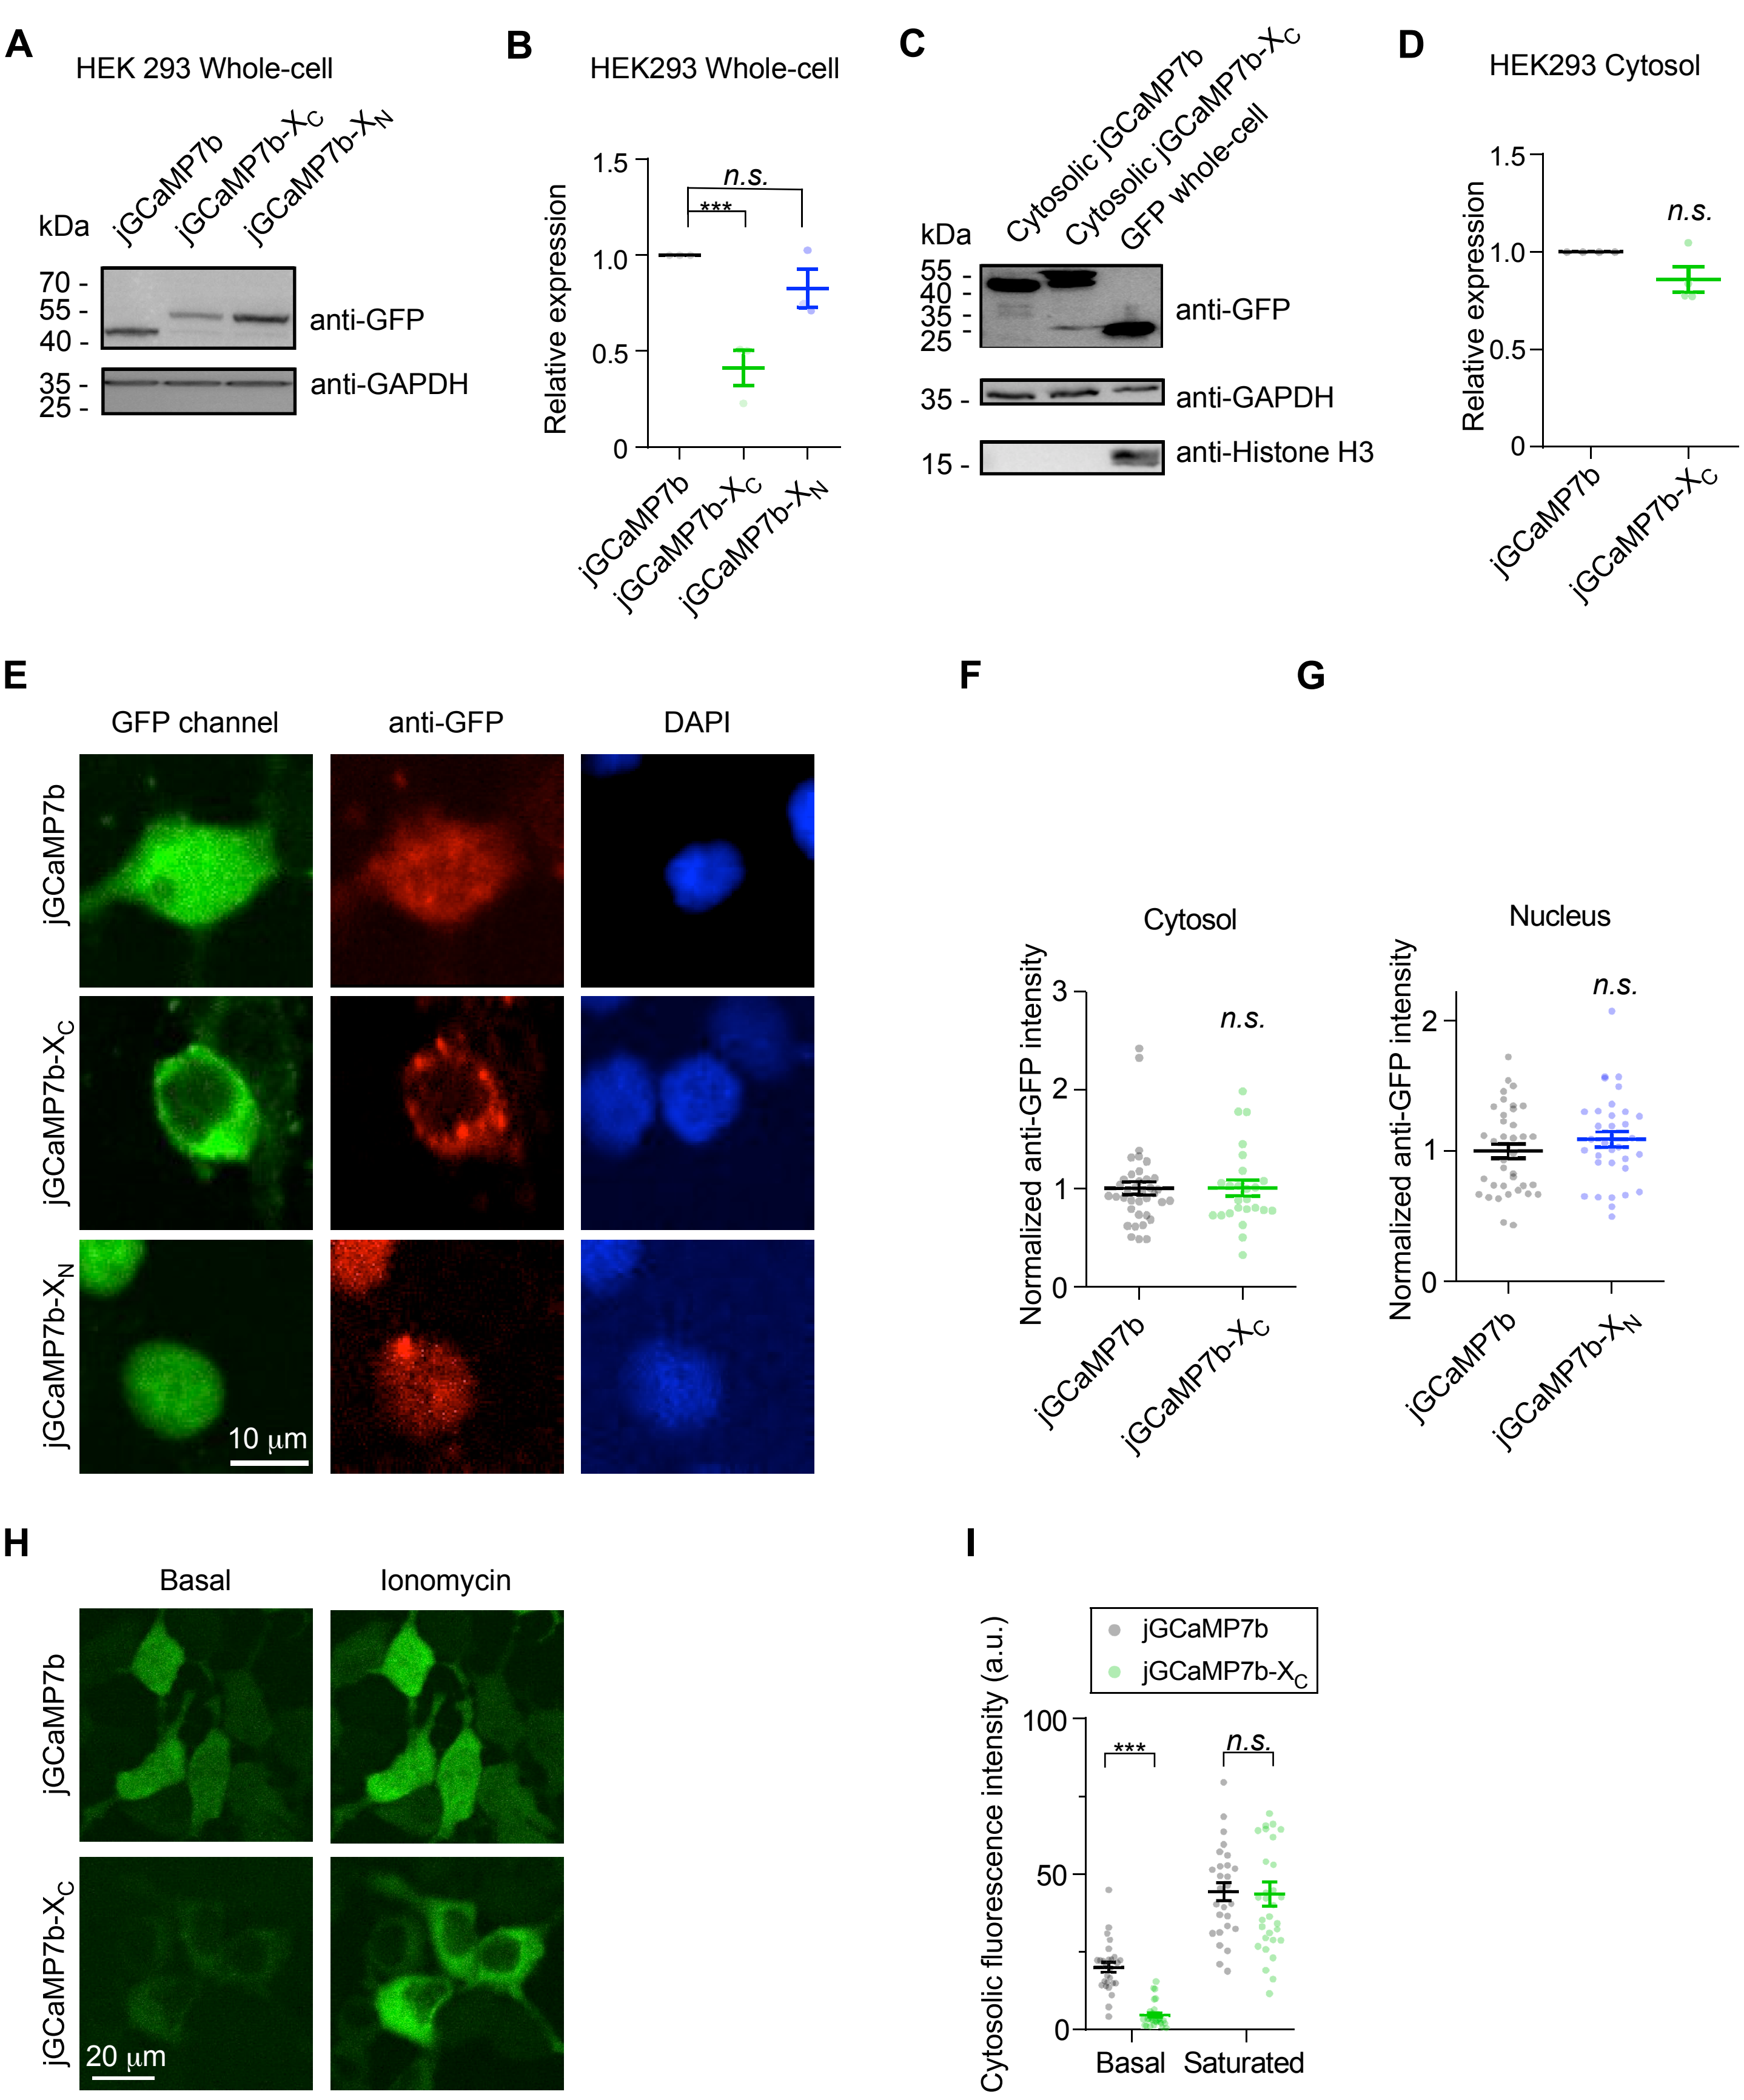

Supplement: supp [file elife-76691-supp-v1.zip]

**A**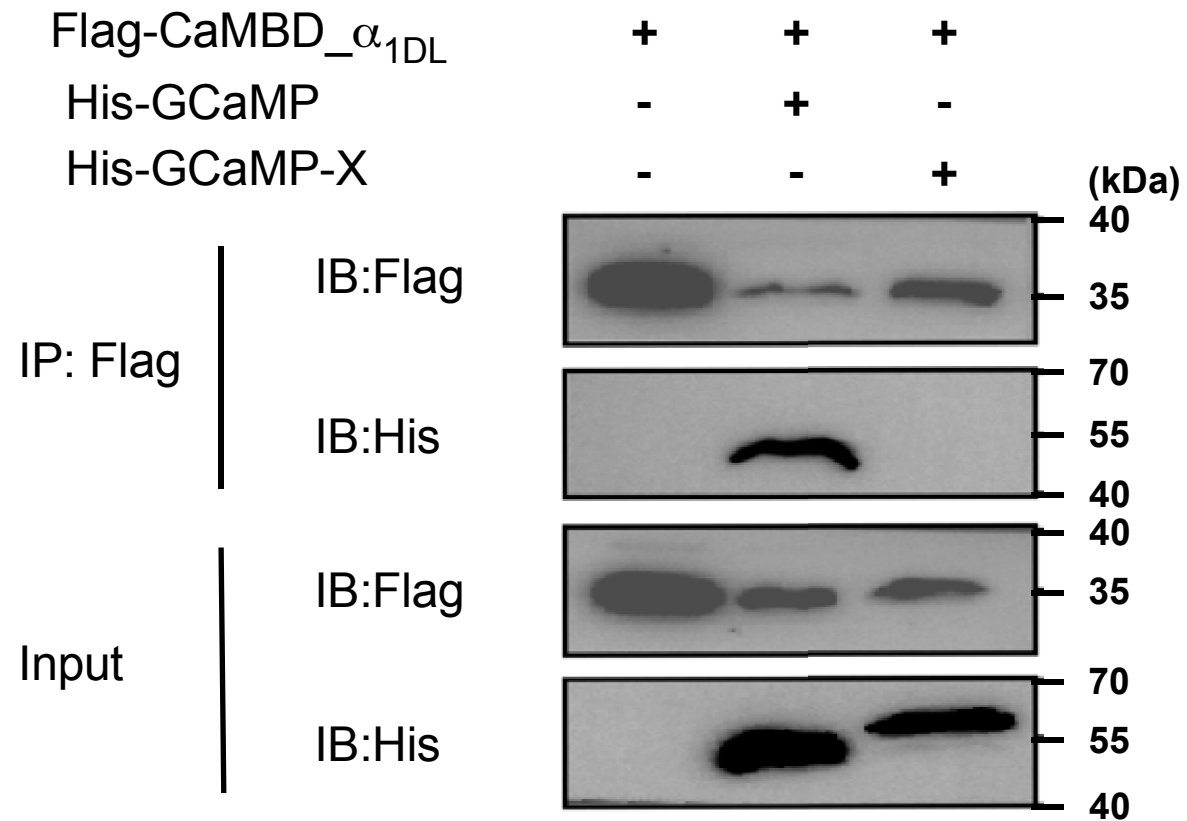**B**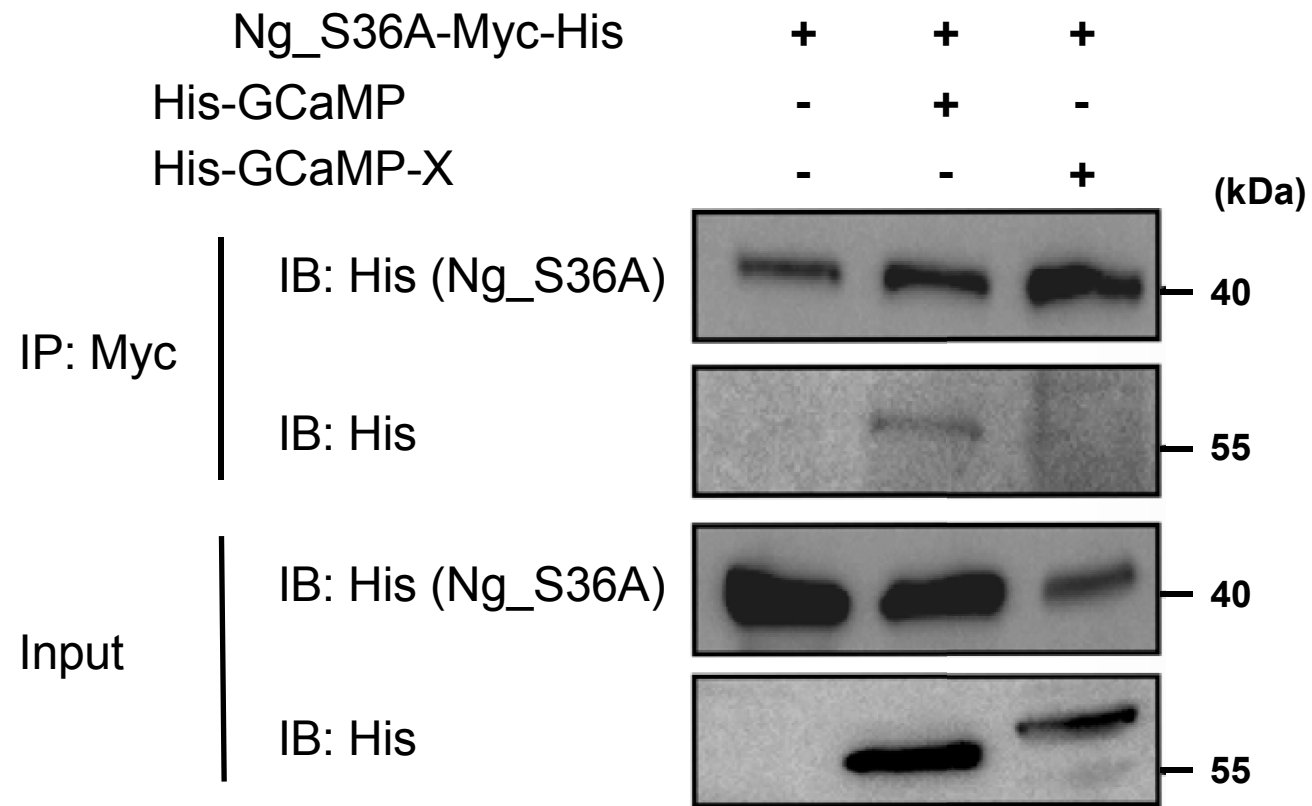

Supplement: supp [file elife-76691-supp-v1.zip]

**A**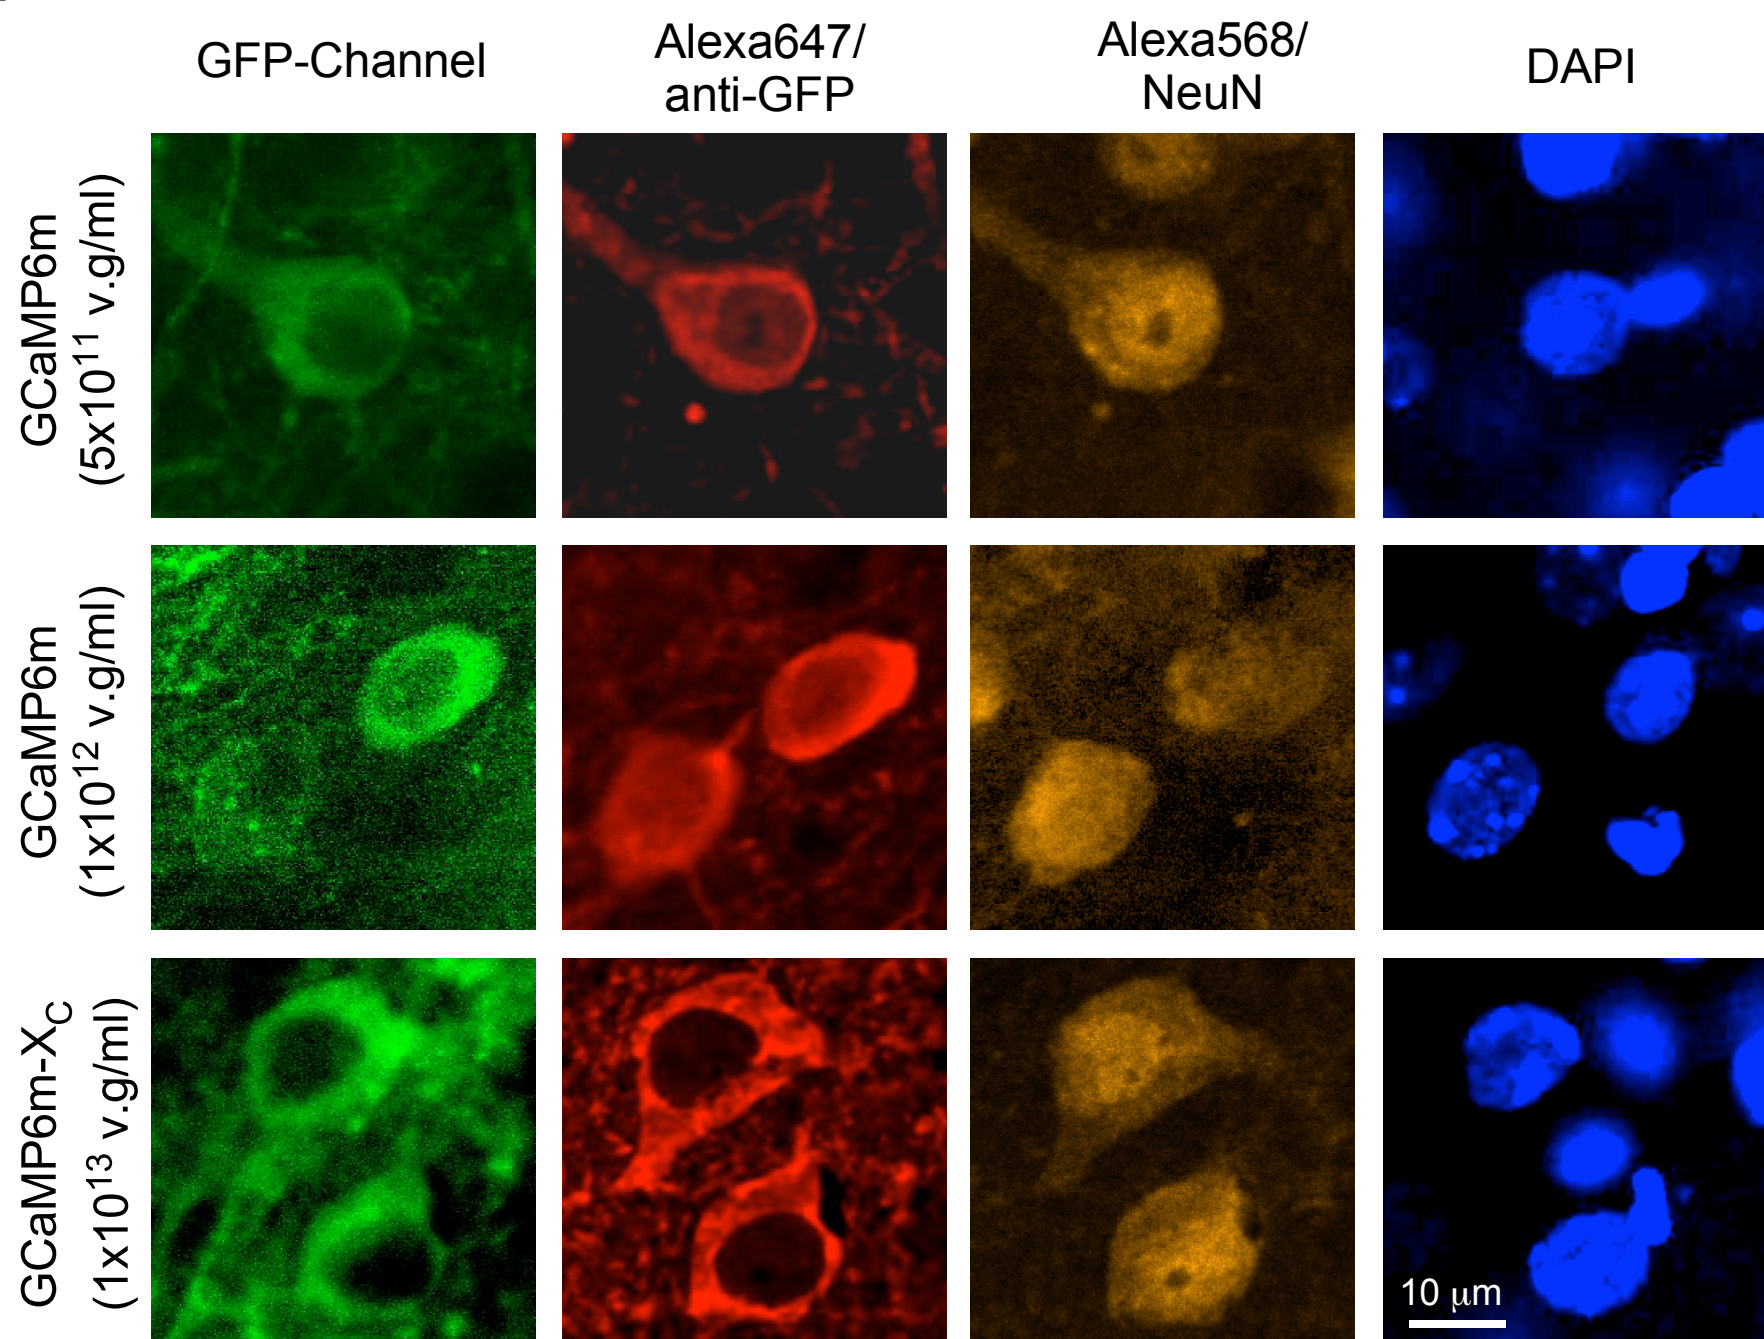**B**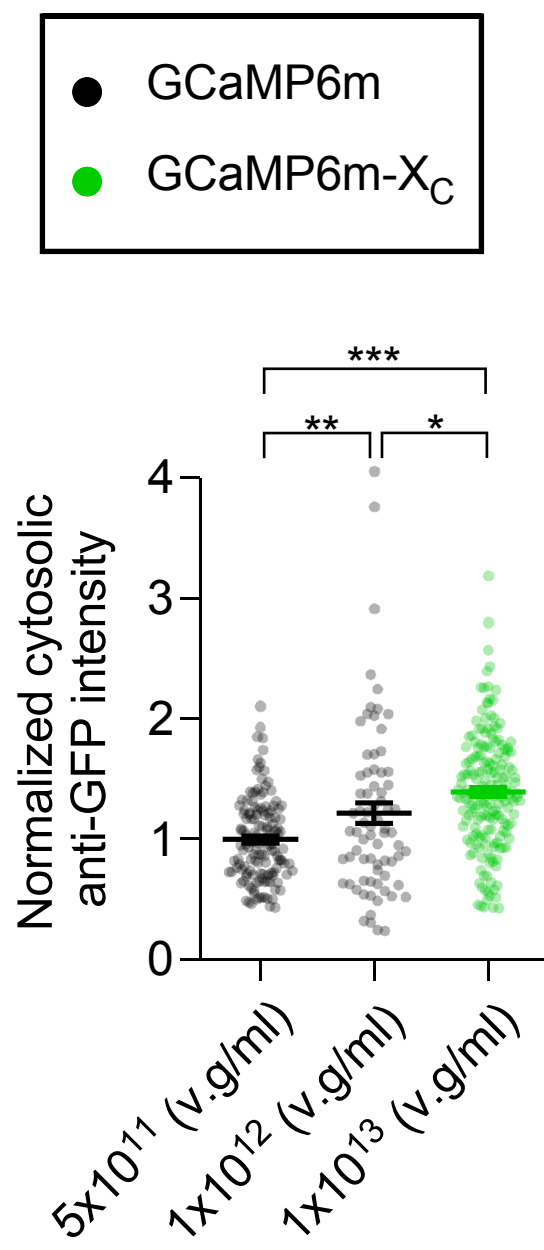**C**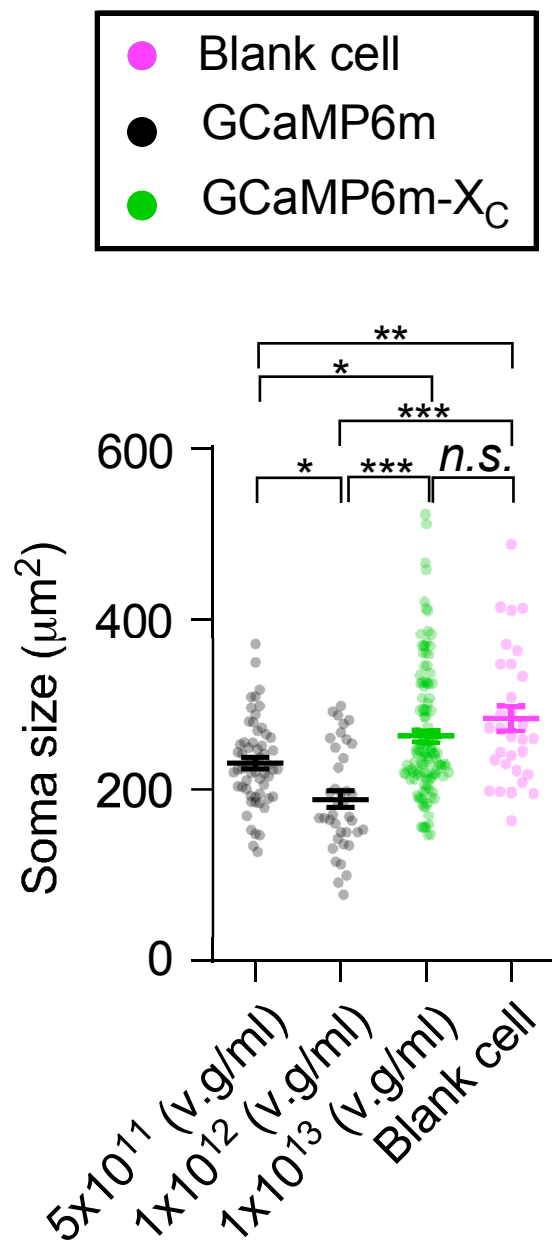

Supplement: supp [file elife-76691-supp-v1.zip]

**A**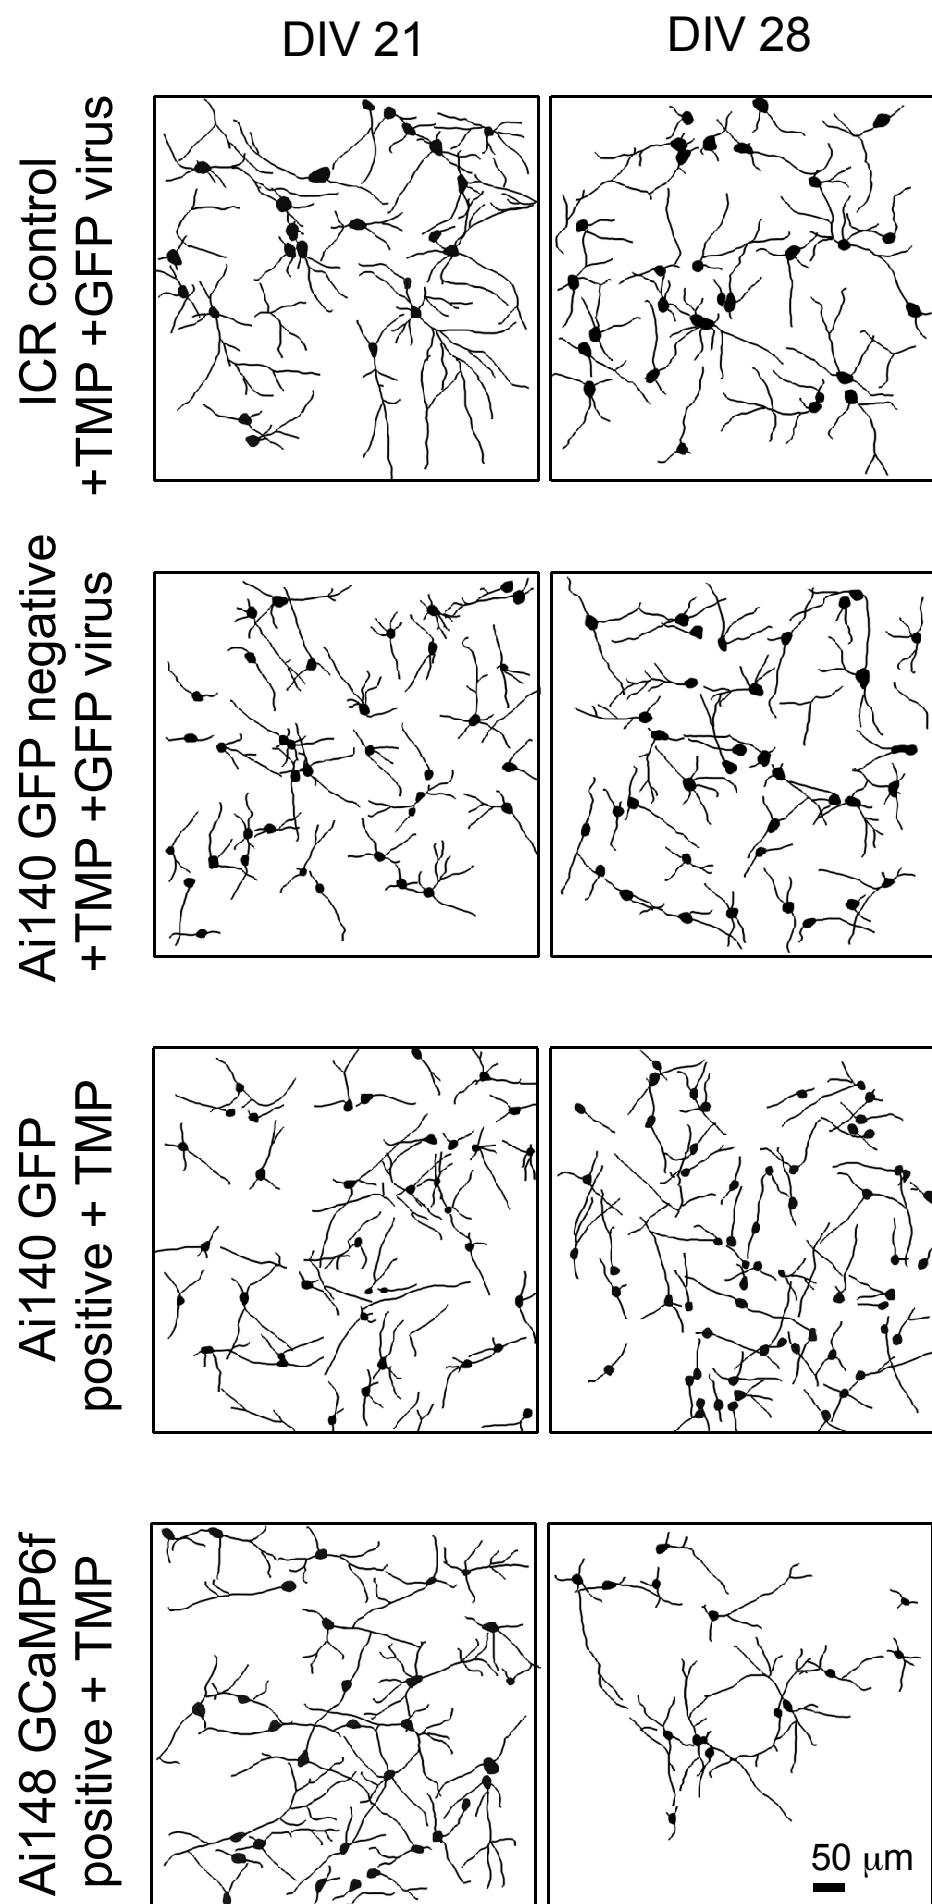**B**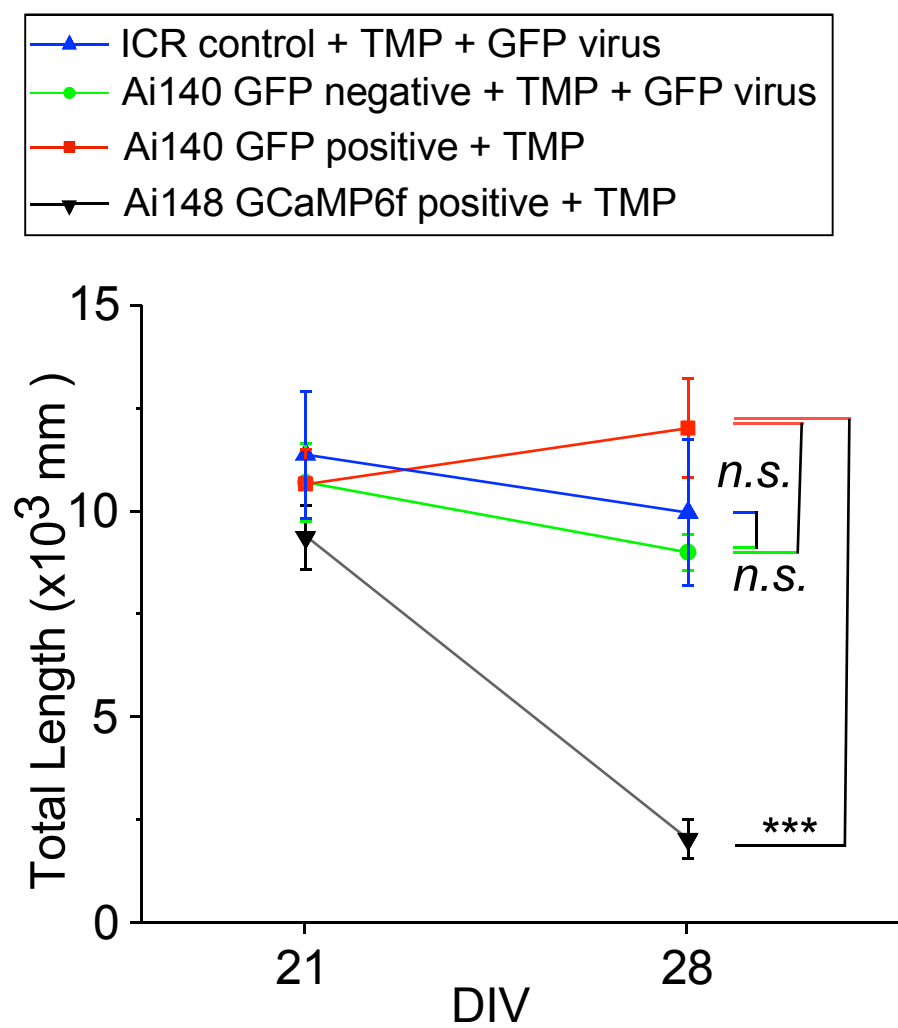

Supplement: supp [file elife-76691-supp-v1.zip]
